# Supplementary material for: The autophagy protein ATG9A promotes HIV-1 infectivity
Source: Retrovirology. 2019 Jul 3;16:18. doi: 10.1186/s12977-019-0480-3 (PMC6607583; doi:10.1186/s12977-019-0480-3)
Supplement: Supplementary file 1 — Additional file 1: Table S1. Identification of HIV-1 and SIV Nef interactors by the TAP-MS protocol outlined in Fig. 1b. Initial datasets were filtered against the experimental control of the empty vector. The “IPI” column provides the International Protein Index identification code referring to the name of the protein in the “User input” column. The “unique peptide” column indicates the number of distinct peptides used to identify the protein whereas the “total peptide” column indicates the total number of identified peptides matched for the protein. Raw data were filtered against the CRAPome database and several values were generated. The experiment appeared (ExpAP) ratio indicates the number of times that protein appeared in a control experiment divided by the total number of experiments analyzed. The column “ExpAP calculated” provides the value of the calculated ratio from the “ExpAP” column. The average spectral count (Ave SC) is the average number of peptides in the experiments where the protein appeared. Max SC is the highest number of peptides found in a single experiment. By multiplying AveSC and ExpAP, we obtained an estimate of both the number of times the protein was identified in a negative control and its abundance when it was identified. [file 12977_2019_480_MOESM1_ESM.xlsx]

## Sheet: empty vector
empty vector
IPI	User Input	Mapped Gene Symbol	Unique peptide	Total peptide
AHNAK_IPI:IPI00021812.2	AHNAK	AHNAK	31	38
MYH9_IPI:IPI00019502.3	MYH9	MYH9	30	40
PLEC1_IPI:IPI00014898.3	PLEC1	PLEC	25	29
FLNB_IPI:IPI00289334.1	FLNB	FLNB	18	18
SERPINB4_IPI:IPI00010303.1	SERPINB4	SERPINB4	17	52
LMNA_IPI:IPI00021405.3	LMNA	LMNA	16	25
C3_IPI:IPI00783987.2	C3	C3	14	24
ANXA1_IPI:IPI00218918.5	ANXA1	ANXA1	13	26
EPPK1_IPI:IPI00010951.2	EPPK1	EPPK1	13	17
ALB_IPI:IPI00022434.4	ALB	ALB	13	23
HSPA8_IPI:IPI00003865.1	HSPA8	HSPA8	12	15
HSPA5_IPI:IPI00003362.2	HSPA5	HSPA5	11	16
PKM2_IPI:IPI00220644.8	PKM2	PKM	11	18
SERPINB3_IPI:IPI00022204.2	SERPINB3	SERPINB3	9	25
SFN_IPI:IPI00013890.2	SFN	SFN	9	22
ACTN4_IPI:IPI00013808.1	ACTN4	ACTN4	9	11
A2M_IPI:IPI00478003.1	A2M	A2M	9	12
IQGAP1_IPI:IPI00009342.1	IQGAP1	IQGAP1	9	9
ANXA2P2_IPI:IPI00334627.3	ANXA2P2	Invalid identifier / gene not available	9	16
PPL_IPI:IPI00298057.2	PPL	PPL	9	10
HSPB1_IPI:IPI00025512.2	HSPB1	HSPB1	8	24
TUBB2C_IPI:IPI00007752.1	TUBB2C	TUBB4B	8	13
HSP90AA1_IPI:IPI00382470.3	HSP90AA1	HSP90AA1	8	11
TGM3_IPI:IPI00300376.4	TGM3	TGM3	8	13
FGB_IPI:IPI00298497.3	FGB	FGB	8	14
IVL_IPI:IPI00011692.2	IVL	IVL	8	8
MPO_IPI:IPI00007244.1	MPO	MPO	8	10
TF_IPI:IPI00022463.1	TF	TF	8	9
P4HB_IPI:IPI00010796.1	P4HB	P4HB	7	8
LTF_IPI:IPI00298860.6	LTF	LTF	7	11
EVPL_IPI:IPI00023711.1	EVPL	EVPL	7	8
ENO1_IPI:IPI00465248.5	ENO1	ENO1	7	9
HIST1H4J_IPI:IPI00453473.6	HIST1H4J	HIST1H4J	7	20
TUBA4A_IPI:IPI00007750.1	TUBA4A	TUBA4A	7	13
ACTA2_IPI:IPI00008603.1	ACTA2	ACTA2	7	21
YWHAZ_IPI:IPI00021263.3	YWHAZ	YWHAZ	6	10
LGALS7_IPI:IPI00219221.3	LGALS7	LGALS7B	6	39
POF1B_IPI:IPI00103242.5	POF1B	POF1B	6	8
ACTBL2_IPI:IPI00003269.1	ACTBL2	ACTBL2	6	24
HSP90AB1_IPI:IPI00414676.6	HSP90AB1	HSP90AB1	6	8
EIF4A1_IPI:IPI00025491.1	EIF4A1	EIF4A1	6	8
CLTC_IPI:IPI00024067.4	CLTC	CLTC	6	7
PKP3_IPI:IPI00026952.1	PKP3	PKP3	6	7
HNRNPK_IPI:IPI00216049.1	HNRNPK	HNRNPK	6	7
HSP90B1_IPI:IPI00027230.3	HSP90B1	HSP90B1	6	8
SERPINB2_IPI:IPI00007117.1	SERPINB2	SERPINB2	6	8
YWHAE_IPI:IPI00000816.1	YWHAE	YWHAE	6	13
IGHA1_IPI:IPI00383164.1	IGHA1	Invalid identifier / gene not available	6	8
VCP_IPI:IPI00022774.3	VCP	VCP	6	8
CTSD_IPI:IPI00011229.1	CTSD	CTSD	6	8
VCL_IPI:IPI00291175.7	VCL	VCL	6	6
PRDX1_IPI:IPI00000874.1	PRDX1	PRDX1	6	9
PGK1_IPI:IPI00169383.3	PGK1	PGK1	6	6
CALML5_IPI:IPI00021536.2	CALML5	CALML5	5	10
GSTP1_IPI:IPI00219757.1	GSTP1	GSTP1	5	8
HSPA1A_IPI:IPI00304925.5	HSPA1A	HSPA1B	5	7
ACTB_IPI:IPI00021439.1	ACTB	ACTB	5	16
PFN1_IPI:IPI00216691.5	PFN1	PFN1	5	9
ATP5B_IPI:IPI00303476.1	ATP5B	ATP5B	5	7
ATP5A1_IPI:IPI00440493.2	ATP5A1	ATP5A1	5	6
GAPDH_IPI:IPI00219018.7	GAPDH	GAPDH	5	10
HSPA1L_IPI:IPI00301277.1	HSPA1L	HSPA1L	5	9
LTA4H_IPI:IPI00219077.4	LTA4H	LTA4H	5	5
TGM1_IPI:IPI00305622.4	TGM1	TGM1	5	6
EEF2_IPI:IPI00186290.6	EEF2	EEF2	5	6
HIST2H2BE_IPI:IPI00003935.6	HIST2H2BE	HIST2H2BE	5	12
CAT_IPI:IPI00465436.4	CAT	CAT	5	5
CTSG_IPI:IPI00028064.1	CTSG	CTSG	5	6
TAGLN2_IPI:IPI00550363.3	TAGLN2	TAGLN2	5	6
HSD17B4_IPI:IPI00019912.3	HSD17B4	HSD17B4	5	5
RPS3_IPI:IPI00011253.3	RPS3	RPS3	5	5
ANXA2_IPI:IPI00418169.3	ANXA2	ANXA2	4	12
GSN_IPI:IPI00026314.1	GSN	GSN	4	5
TUBA1C_IPI:IPI00166768.3	TUBA1C	TUBA1C	4	7
VIM_IPI:IPI00418471.6	VIM	VIM	4	8
SERPINB1_IPI:IPI00027444.1	SERPINB1	SERPINB1	4	6
TXN_IPI:IPI00216298.6	TXN	TXN	4	6
PHGDH_IPI:IPI00011200.5	PHGDH	PHGDH	4	4
TPI1_IPI:IPI00383071.1	TPI1	TPI1	4	7
PDIA3_IPI:IPI00025252.1	PDIA3	PDIA3	4	4
CAPG_IPI:IPI00027341.1	CAPG	CAPG	4	4
YWHAQ_IPI:IPI00018146.1	YWHAQ	YWHAQ	4	6
ACADVL_IPI:IPI00028031.2	ACADVL	ACADVL	4	4
MDH2_IPI:IPI00291006.2	MDH2	MDH2	4	6
GSDMA_IPI:IPI00166200.4	GSDMA	GSDMA	4	5
EEF1A2_IPI:IPI00014424.1	EEF1A2	EEF1A2	4	7
ALDOA_IPI:IPI00465439.5	ALDOA	ALDOA	4	6
CAPZB_IPI:IPI00026185.6	CAPZB	CAPZB	4	4
IPI:IPI00550731.2_IPI:IPI00550731.2	IPI:IPI00550731	Invalid identifier / gene not available	3	26
HNRNPU_IPI:IPI00479217.1	HNRNPU	HNRNPU	3	3
RPLP2_IPI:IPI00008529.1	RPLP2	RPLP2	3	3
XRCC6_IPI:IPI00644712.4	XRCC6	XRCC6	3	4
ANXA3_IPI:IPI00024095.3	ANXA3	ANXA3	3	3
RNH1_IPI:IPI00550069.3	RNH1	RNH1	3	3
NP_IPI:IPI00017672.4	NP	Invalid identifier / gene not available	3	6
EEF1A1_IPI:IPI00025447.8	EEF1A1	EEF1A1	3	6
ACTN1_IPI:IPI00013508.5	ACTN1	ACTN1	3	6
IGLC1_IPI:IPI00154742.6	IGLC1	IGLL5	3	22
IGHG1_IPI:IPI00384938.1	IGHG1	Invalid identifier / gene not available	3	16
HSP90AA2_IPI:IPI00031523.4	HSP90AA2	Invalid identifier / gene not available	3	3
FGG_IPI:IPI00021891.5	FGG	FGG	3	6
RPL18_IPI:IPI00215719.6	RPL18	RPL18	3	3
RPS4X_IPI:IPI00217030.1	RPS4X	RPS4X	3	5
GGCT_IPI:IPI00031564.1	GGCT	GGCT	3	5
YWHAB_IPI:IPI00216318.5	YWHAB	YWHAB	3	4
NPM1_IPI:IPI00220740.1	NPM1	NPM1	3	3
UBC_IPI:IPI00179330.6	UBC	UBC	3	8
FLNA_IPI:IPI00302592.2	FLNA	FLNA	3	4
PA2G4_IPI:IPI00299000.5	PA2G4	PA2G4	3	3
HMGCS1_IPI:IPI00008475.1	HMGCS1	HMGCS1	3	3
FGA_IPI:IPI00021885.1	FGA	FGA	3	3
LDHA_IPI:IPI00217966.8	LDHA	LDHA	3	4
AHNAK2_IPI:IPI00856045.1	AHNAK2	AHNAK2	3	3
A2ML1_IPI:IPI00419215.5	A2ML1	A2ML1	3	4
SPTAN1_IPI:IPI00744706.2	SPTAN1	SPTAN1	3	3
IGHG3_IPI:IPI00168728.1	IGHG3	Invalid identifier / gene not available	3	11
CAP1_IPI:IPI00008274.7	CAP1	CAP1	2	3
IL1RN_IPI:IPI00000045.1	IL1RN	IL1RN	2	3
CALML3_IPI:IPI00216984.5	CALML3	CALML3	2	4
SERPINA1_IPI:IPI00305457.5	SERPINA1	SERPINA1	2	2
UBA1_IPI:IPI00645078.1	UBA1	UBA1	2	2
TUBB_IPI:IPI00011654.2	TUBB	TUBB	2	3
CFL1_IPI:IPI00012011.6	CFL1	CFL1	2	6
RPLP0_IPI:IPI00008530.1	RPLP0	RPLP0	2	2
HSPA7_IPI:IPI00011134.2	HSPA7	Invalid identifier / gene not available	2	4
CKAP4_IPI:IPI00141318.2	CKAP4	CKAP4	2	2
CLIC1_IPI:IPI00010896.3	CLIC1	CLIC1	2	2
RPLP1_IPI:IPI00008527.3	RPLP1	RPLP1	2	2
HNRNPA2B1_IPI:IPI00386854.6	HNRNPA2B1	HNRNPA2B1	2	2
IGHM_IPI:IPI00477090.7	IGHM	Invalid identifier / gene not available	2	2
MT-CO2_IPI:IPI00017510.3	MT-CO2	MT-CO2	2	2
PDIA6_IPI:IPI00299571.5	PDIA6	PDIA6	2	2
NAMPT_IPI:IPI00018873.1	NAMPT	NAMPT	2	2
ANXA4_IPI:IPI00793199.1	ANXA4	ANXA4	2	2
CALM1_IPI:IPI00075248.1	CALM1	CALM3	2	2
GPI_IPI:IPI00027497.5	GPI	GPI	2	2
TYMP_IPI:IPI00292858.4	TYMP	TYMP	2	3
RDX_IPI:IPI00017367.6	RDX	RDX	2	2
RPS6_IPI:IPI00021840.1	RPS6	RPS6	2	2
EEF1D_IPI:IPI00023048.4	EEF1D	EEF1D	2	2
ARF1_IPI:IPI00215914.5	ARF1	ARF1	2	2
PGAM2_IPI:IPI00218570.6	PGAM2	PGAM2	2	2
MVP_IPI:IPI00000105.4	MVP	MVP	2	2
UBA1_IPI:IPI00026119.6	UBA1	UBA1	2	2
PPP2R1A_IPI:IPI00168184.8	PPP2R1A	PPP2R1A	2	2
RAB7A_IPI:IPI00016342.1	RAB7A	RAB7A	2	2
NDRG1_IPI:IPI00022078.3	NDRG1	NDRG1	2	3
DSC1_IPI:IPI00216099.3	DSC1	DSC1	2	2
CTNNA1_IPI:IPI00215948.4	CTNNA1	CTNNA1	2	2
SERPINB5_IPI:IPI00783625.2	SERPINB5	SERPINB5	2	3
STOM_IPI:IPI00219682.6	STOM	STOM	2	2
TPM4_IPI:IPI00010779.4	TPM4	TPM4	2	2
AZU1_IPI:IPI00022246.1	AZU1	AZU1	2	2
PPIA_IPI:IPI00419585.9	PPIA	PPIA	2	2
IGLC1_IPI:IPI00719373.2	IGLC1	IGLL5	2	2
HNRNPA3_IPI:IPI00419373.1	HNRNPA3	HNRNPA3	2	2
HADHB_IPI:IPI00022793.5	HADHB	HADHB	2	2
RPL22_IPI:IPI00219153.4	RPL22	RPL22	2	2
PSMA7_IPI:IPI00024175.3	PSMA7	PSMA7	2	2
RPL3_IPI:IPI00550021.4	RPL3	RPL3	2	2
CCT2_IPI:IPI00297779.7	CCT2	CCT2	2	2
PRDX6_IPI:IPI00220301.5	PRDX6	PRDX6	2	2
KIF5B_IPI:IPI00012837.1	KIF5B	KIF5B	2	2
PGM2_IPI:IPI00550364.8	PGM2	PGM2	2	2
CAPZA1_IPI:IPI00005969.3	CAPZA1	CAPZA1	2	2
C4A_IPI:IPI00032258.4	C4A	C4A	2	2
RAB1A_IPI:IPI00005719.1	RAB1A	RAB1A	2	2
LMNB1_IPI:IPI00217975.4	LMNB1	LMNB1	2	2
EZR_IPI:IPI00746388.3	EZR	EZR	2	2
GOT2_IPI:IPI00018206.3	GOT2	GOT2	2	2
ILK-2_IPI:IPI00302927.6	ILK-2	Invalid identifier / gene not available	2	2
ERO1L_IPI:IPI00386755.2	ERO1L	ERO1L	2	2
GNB2L1_IPI:IPI00641950.4	GNB2L1	GNB2L1	2	2
FASN_IPI:IPI00026781.2	FASN	FASN	2	2
SOD1_IPI:IPI00218733.6	SOD1	SOD1	2	2
EEF1G_IPI:IPI00000875.7	EEF1G	EEF1G	2	2
HNRNPA2B1_IPI:IPI00396378.3	HNRNPA2B1	HNRNPA2B1	2	2
ACTR2_IPI:IPI00005159.3	ACTR2	ACTR2	2	2
DYNC1H1_IPI:IPI00456969.1	DYNC1H1	DYNC1H1	2	2
DDX5_IPI:IPI00017617.1	DDX5	DDX5	2	2
H2AFV_IPI:IPI00018278.3	H2AFV	H2AFV	2	2
IPI:IPI00328587.4_IPI:IPI00328587.4	IPI:IPI00328587	Invalid identifier / gene not available	2	2
TRIM29_IPI:IPI00073096.3	TRIM29	TRIM29	2	2
NCL_IPI:IPI00183526.6	NCL	NCL	2	2
PYCARD_IPI:IPI00001699.1	PYCARD	PYCARD	2	2
CA2_IPI:IPI00218414.5	CA2	CA2	2	2
SH3BGRL3_IPI:IPI00010402.2	SH3BGRL3	SH3BGRL3	2	2
LOC653879_IPI:IPI00739237.1	LOC653879	Invalid identifier / gene not available	2	2
RPS8_IPI:IPI00216587.9	RPS8	RPS8	2	2
HSPA9_IPI:IPI00007765.5	HSPA9	HSPA9	2	2
PDCD6IP_IPI:IPI00246058.9	PDCD6IP	PDCD6IP	2	2
HP_IPI:IPI00431645.1	HP	HPR	2	2
MYH14_IPI:IPI00029818.5	MYH14	MYH14	2	2
CLIC3_IPI:IPI00000692.2	CLIC3	CLIC3	2	2
CKMT1B_IPI:IPI00658109.1	CKMT1B	CKMT1B	1	1
IPI:IPI00382494.1_IPI:IPI00382494.1	IPI:IPI00382494	Invalid identifier / gene not available	1	1
DBNL_IPI:IPI00101968.3	DBNL	DBNL	1	1
ALDOC_IPI:IPI00418262.5	ALDOC	ALDOC	1	1
HIST1H2AB_IPI:IPI00026272.2	HIST1H2AB	HIST1H2AE	1	1
TPM3_IPI:IPI00218319.3	TPM3	TPM3	1	1
ENO2_IPI:IPI00216171.3	ENO2	ENO2	1	1
RPL19_IPI:IPI00025329.1	RPL19	RPL19	1	1
TPD52L2_IPI:IPI00221178.1	TPD52L2	TPD52L2	1	1
TUBA1A_IPI:IPI00180675.4	TUBA1A	TUBA1A	1	1
SERPINB5_IPI:IPI00644196.1	SERPINB5	SERPINB5	1	1
RPL11_IPI:IPI00376798.3	RPL11	RPL11	1	1
ANXA8_IPI:IPI00872295.2	ANXA8	ANXA8	1	1
LCN2_IPI:IPI00299547.4	LCN2	LCN2	1	1
HNRNPAB_IPI:IPI00334587.1	HNRNPAB	HNRNPAB	1	1
SERPINA1_IPI:IPI00553177.1	SERPINA1	SERPINA1	1	1
IGKV3-20_IPI:IPI00030205.3	IGKV3-20	Invalid identifier / gene not available	1	1
ARHGDIA_IPI:IPI00003815.3	ARHGDIA	ARHGDIA	1	1
MYL12B_IPI:IPI00033494.3	MYL12B	MYL12B	1	1
PEBP1_IPI:IPI00219446.5	PEBP1	PEBP1	1	1
IPI:IPI00240503.7_IPI:IPI00240503.7	IPI:IPI00240503	Invalid identifier / gene not available	1	1
IPI:IPI00382440.1_IPI:IPI00382440.1	IPI:IPI00382440	Invalid identifier / gene not available	1	1
VPS35_IPI:IPI00018931.6	VPS35	VPS35	1	1
IPI:IPI00384397.1_IPI:IPI00384397.1	IPI:IPI00384397	Invalid identifier / gene not available	1	1
YWHAG_IPI:IPI00220642.7	YWHAG	YWHAG	1	1
PKM2_IPI:IPI00479186.7	PKM2	PKM	1	1
RPL7A_IPI:IPI00299573.1	RPL7A	RPL7A	1	1
HAL_IPI:IPI00031425.1	HAL	HAL	1	1
SERPINA3_IPI:IPI00550991.3	SERPINA3	SERPINA3	1	1
NACA_IPI:IPI00023748.3	NACA	NACA	1	1
CAP1_IPI:IPI00643567.2	CAP1	CAP1	1	1
PYGL_IPI:IPI00783313.2	PYGL	PYGL	1	1
TREX2_IPI:IPI00383247.2	TREX2	TREX2	1	1
TAX1BP3_IPI:IPI00005585.5	TAX1BP3	TAX1BP3	1	1
TUFM_IPI:IPI00027107.5	TUFM	TUFM	1	1
HSP90AB1_IPI:IPI00411633.4	HSP90AB1	HSP90AB1	1	1
RPL12_IPI:IPI00024933.3	RPL12	RPL12	1	1
HNRNPD_IPI:IPI00028888.1	HNRNPD	HNRNPD	1	1
RPS14_IPI:IPI00026271.5	RPS14	RPS14	1	1
COPB2_IPI:IPI00220219.6	COPB2	COPB2	1	1
TUBB1_IPI:IPI00006510.1	TUBB1	TUBB1	1	1
MYL6_IPI:IPI00335168.9	MYL6	MYL6	1	1
ACTR1A_IPI:IPI00029468.1	ACTR1A	ACTR1A	1	1
DLST_IPI:IPI00384016.1	DLST	DLST	1	1
RPL4_IPI:IPI00003918.6	RPL4	RPL4	1	1
IPI:IPI00382478.1_IPI:IPI00382478.1	IPI:IPI00382478	Invalid identifier / gene not available	1	1
CS_IPI:IPI00025366.4	CS	CS	1	1
GNAI2_IPI:IPI00217906.3	GNAI2	GNAI2	1	1
PCNT_IPI:IPI00479143.2	PCNT	PCNT	1	1
SORD_IPI:IPI00216057.5	SORD	SORD	1	1
KIAA1967_IPI:IPI00182757.1	KIAA1967	CCAR2	1	1
MYL6B_IPI:IPI00027255.1	MYL6B	MYL6B	1	1
CLTCL1_IPI:IPI00022881.1	CLTCL1	CLTCL1	1	1
IPI:IPI00383732.1_IPI:IPI00383732.1	IPI:IPI00383732	Invalid identifier / gene not available	1	1
TUBB2A_IPI:IPI00013475.1	TUBB2A	TUBB2A	1	1
RPSAP12_IPI:IPI00398958.3	RPSAP12	Invalid identifier / gene not available	1	1
ATP6V1A_IPI:IPI00007682.2	ATP6V1A	ATP6V1A	1	1
RAB5C_IPI:IPI00016339.4	RAB5C	RAB5C	1	1
PRKCSH_IPI:IPI00026154.3	PRKCSH	PRKCSH	1	1
NCKAP1_IPI:IPI00031982.1	NCKAP1	NCKAP1	1	1
IPI:IPI00069693.4_IPI:IPI00069693.4	IPI:IPI00069693	Invalid identifier / gene not available	1	1
TPI1_IPI:IPI00465028.7	TPI1	TPI1	1	1
PPA2_IPI:IPI00301109.4	PPA2	PPA2	1	1
KLK13_IPI:IPI00007726.1	KLK13	KLK13	1	1
DARS_IPI:IPI00216951.2	DARS	DARS	1	1
TPM1_IPI:IPI00000230.6	TPM1	TPM1	1	1
RAB11B_IPI:IPI00020436.4	RAB11B	RAB11B	1	1
IPI:IPI00453476.2_IPI:IPI00453476.2	IPI:IPI00453476	Invalid identifier / gene not available	1	1
RAB25_IPI:IPI00027993.2	RAB25	RAB25	1	1
IL1F9_IPI:IPI00021343.1	IL1F9	Invalid identifier / gene not available	1	1
PKLR_IPI:IPI00027165.3	PKLR	PKLR	1	1
TPM4_IPI:IPI00216975.1	TPM4	TPM4	1	1
VTN_IPI:IPI00298971.1	VTN	VTN	1	1
ALOX12B_IPI:IPI00025278.1	ALOX12B	ALOX12B	1	1
PSMB1_IPI:IPI00025019.3	PSMB1	PSMB1	1	1
IPI:IPI00176692.7_IPI:IPI00176692.7	IPI:IPI00176692	Invalid identifier / gene not available	1	1
TTLL3_IPI:IPI00386354.1	TTLL3	TTLL3	1	1
IPI:IPI00385264.1_IPI:IPI00385264.1	IPI:IPI00385264	Invalid identifier / gene not available	1	1
NUP50_IPI:IPI00026940.2	NUP50	NUP50	1	1
RPL15_IPI:IPI00470528.5	RPL15	RPL15	1	1
PSMB3_IPI:IPI00028004.2	PSMB3	PSMB3	1	1
TPD52_IPI:IPI00619951.3	TPD52	TPD52	1	1
TUBA4B_IPI:IPI00017454.4	TUBA4B	Invalid identifier / gene not available	1	1
MAT2A_IPI:IPI00010157.1	MAT2A	MAT2A	1	1
RPL13_IPI:IPI00465361.4	RPL13	RPL13	1	1
IPI:IPI00382488.1_IPI:IPI00382488.1	IPI:IPI00382488	Invalid identifier / gene not available	1	1
CALR_IPI:IPI00020599.1	CALR	CALR	1	1
FKBP4_IPI:IPI00219005.3	FKBP4	FKBP4	1	1
LOC100131813_IPI:IPI00886929.1	LOC100131813	Invalid identifier / gene not available	1	1
RAB2A_IPI:IPI00031169.1	RAB2A	RAB2A	1	1
ZNF185_IPI:IPI00641065.4	ZNF185	ZNF185	1	1
RAB10_IPI:IPI00016513.5	RAB10	RAB10	1	1
RPL7_IPI:IPI00030179.3	RPL7	RPL7	1	1
STX7_IPI:IPI00289876.6	STX7	STX7	1	1
CHMP4B_IPI:IPI00025974.3	CHMP4B	CHMP4B	1	1
PRDX5_IPI:IPI00024915.2	PRDX5	PRDX5	1	1
TUBB6_IPI:IPI00646779.2	TUBB6	TUBB6	1	1
SBSN_IPI:IPI00373937.3	SBSN	SBSN	1	1
PSMD2_IPI:IPI00012268.3	PSMD2	PSMD2	1	1
IPI:IPI00911039.1_IPI:IPI00911039.1	IPI:IPI00911039	Invalid identifier / gene not available	1	1
PDXK_IPI:IPI00013004.1	PDXK	PDXK	1	1
ANXA8L1_IPI:IPI00414499.3	ANXA8L1	ANXA8L1	1	1
ATXN2L_IPI:IPI00456359.1	ATXN2L	ATXN2L	1	1
ZNF185_IPI:IPI00005688.1	ZNF185	ZNF185	1	1
SPTLC1_IPI:IPI00005745.1	SPTLC1	SPTLC1	1	1
PCBP2_IPI:IPI00012066.2	PCBP2	PCBP2	1	1
CBR1_IPI:IPI00295386.7	CBR1	CBR1	1	1
FAM125B_IPI:IPI00022918.6	FAM125B	Invalid identifier / gene not available	1	1
TSTA3_IPI:IPI00014361.1	TSTA3	TSTA3	1	1
CRABP2_IPI:IPI00216088.3	CRABP2	CRABP2	1	1
RANP1_IPI:IPI00643041.3	RANP1	Invalid identifier / gene not available	1	1
RAB15_IPI:IPI00383449.2	RAB15	RAB15	1	1
RAB39_IPI:IPI00001618.2	RAB39	Invalid identifier / gene not available	1	1
USP5_IPI:IPI00024664.1	USP5	USP5	1	1
DNM2_IPI:IPI00033022.2	DNM2	DNM2	1	1
RPL13P12_IPI:IPI00397611.2	RPL13P12	Invalid identifier / gene not available	1	1
ATAD5_IPI:IPI00102575.4	ATAD5	ATAD5	1	1
TUBB3_IPI:IPI00013683.2	TUBB3	Invalid identifier / gene not available	1	1
NCL_IPI:IPI00444262.3	NCL	NCL	1	1
IPI:IPI00180730.1_IPI:IPI00180730.1	IPI:IPI00180730	Invalid identifier / gene not available	1	1
ETFA_IPI:IPI00010810.1	ETFA	ETFA	1	1
HIST1H1C_IPI:IPI00217465.5	HIST1H1C	HIST1H1C	1	1
OTUB1_IPI:IPI00000581.6	OTUB1	OTUB1	1	1
VDAC1_IPI:IPI00216308.5	VDAC1	VDAC1	1	1
HIP1R_IPI:IPI00024417.1	HIP1R	HIP1R	1	1
ALDH4A1_IPI:IPI00217871.4	ALDH4A1	ALDH4A1	1	1
RPN2_IPI:IPI00028635.4	RPN2	RPN2	1	1
SSBP1_IPI:IPI00029744.1	SSBP1	SSBP1	1	1
AP1B1_IPI:IPI00328257.4	AP1B1	AP1B1	1	1
IL1F6_IPI:IPI00004382.1	IL1F6	Invalid identifier / gene not available	1	1
SEPT5_IPI:IPI00017731.1	2015-09-05	Invalid identifier / gene not available	1	1
LCP1_IPI:IPI00010471.5	LCP1	LCP1	1	1
HADHA_IPI:IPI00031522.2	HADHA	HADHA	1	1
EPC2_IPI:IPI00141118.6	EPC2	EPC2	1	1
UBE2L3_IPI:IPI00021347.1	UBE2L3	UBE2L3	1	1
IL1F5_IPI:IPI00017500.3	IL1F5	Invalid identifier / gene not available	1	1
PABPC1_IPI:IPI00008524.1	PABPC1	PABPC1	1	1
AHCY_IPI:IPI00012007.6	AHCY	AHCY	1	1
HIST1H1B_IPI:IPI00217468.3	HIST1H1B	HIST1H1B	1	1
VARS_IPI:IPI00000873.3	VARS	VARS	1	1
CORO1A_IPI:IPI00010133.3	CORO1A	CORO1A	1	1
C22orf28_IPI:IPI00550689.3	C22ORF28	Invalid identifier / gene not available	1	1
RPS11_IPI:IPI00025091.3	RPS11	RPS11	1	1
RPL36AP37_IPI:IPI00026230.1	RPL36AP37	Invalid identifier / gene not available	1	1
ACTA2_IPI:IPI00927545.1	ACTA2	ACTA2	1	1
DCTN2_IPI:IPI00220503.9	DCTN2	DCTN2	1	1
NT5C3_IPI:IPI00100192.4	NT5C3	Invalid identifier / gene not available	1	1
ITPKC_IPI:IPI00061203.1	ITPKC	ITPKC	1	1
LOC100130055_IPI:IPI00888004.1	LOC100130055	Invalid identifier / gene not available	1	1
FKBP1A_IPI:IPI00413778.7	FKBP1A	FKBP1A	1	1
ARG1_IPI:IPI00291560.4	ARG1	ARG1	1	1
NSFL1C_IPI:IPI00022830.3	NSFL1C	NSFL1C	1	1
KARS_IPI:IPI00014238.2	KARS	KARS	1	1
TUBB6_IPI:IPI00641706.1	TUBB6	TUBB6	1	1
API5_IPI:IPI00554742.3	API5	API5	1	1
ERP44_IPI:IPI00401264.5	ERP44	ERP44	1	1
KPNB1_IPI:IPI00001639.2	KPNB1	KPNB1	1	1
DSTN_IPI:IPI00473014.5	DSTN	DSTN	1	1
PDLIM1_IPI:IPI00010414.4	PDLIM1	PDLIM1	1	1
HNRNPM_IPI:IPI00171903.2	HNRNPM	HNRNPM	1	1
EHD1_IPI:IPI00017184.2	EHD1	EHD1	1	1
H2AFY_IPI:IPI00059366.4	H2AFY	H2AFY	1	1
ERP29_IPI:IPI00024911.1	ERP29	ERP29	1	1
CANX_IPI:IPI00020984.2	CANX	CANX	1	1
ACO2_IPI:IPI00017855.1	ACO2	ACO2	1	1
SOD2_IPI:IPI00022314.1	SOD2	SOD2	1	1
SEC24C_IPI:IPI00024661.4	SEC24C	SEC24C	1	1
EFHD2_IPI:IPI00060181.1	EFHD2	EFHD2	1	1

## Sheet: HIV-1 Nef
HIV-1 Nef
IPI	User Input	Mapped Gene Symbol	Unique peptide	Total peptide	ExpAP	ExpAP Calculated	Ave SC	Max SC	ExpAP x Ave SC
PRKDC_IPI:IPI00296337.2	PRKDC	PRKDC	81	135	175 / 411	0.425791	22	175	9.3674
ACACA_IPI:IPI00011569.2	ACACA	ACACA	76	116	86 / 411	0.209246	139.1	840	29.1061
GCN1L1_IPI:IPI00001159.1	GCN1L1	GCN1L1	44	54	104 / 411	0.253041	11.4	105	2.88467
LRPPRC_IPI:IPI00783271.1	LRPPRC	LRPPRC	35	46	130 / 411	0.316302	15.5	112	4.90268
CKAP4_IPI:IPI00141318.2	CKAP4	CKAP4	19	25	58 / 411	0.141119	5	24	0.705596
HSPA8_IPI:IPI00003865.1	HSPA8	HSPA8	18	27	396 / 411	0.963504	39.2	332	37.7693
PC_IPI:IPI00299402.1	PC	PC	18	21	106 / 411	0.257908	180.2	1354	46.4749
ATP1A1_IPI:IPI00006482.1	ATP1A1	ATP1A4	17	24	45 / 411	0.109489	2.3	15	0.251825
MCM3_IPI:IPI00013214.2	MCM3	MCM3	17	18	120 / 411	0.291971	6.6	63	1.92701
IRS4_IPI:IPI00020729.1	IRS4	IRS4	16	21	152 / 411	0.36983	11	105	4.06813
MDN1_IPI:IPI00167941.1	MDN1	MDN1	16	16	27 / 411	0.0656934	2.4	8	0.157664
ATXN2L_IPI:IPI00456359.1	ATXN2L	ATXN2L	16	23	127 / 411	0.309002	17.4	113	5.37664
XPO1_IPI:IPI00298961.3	XPO1	XPO1	15	16	95 / 411	0.231144	4	51	0.924574
CAD_IPI:IPI00301263.2	CAD	CAD	15	16	147 / 411	0.357664	11.3	88	4.04161
CAND1_IPI:IPI00100160.3	CAND1	CAND1	14	14	88 / 411	0.214112	6.5	61	1.39173
SLC25A13_IPI:IPI00007084.3	SLC25A13	SLC25A13	13	17	50 / 411	0.121655	3.4	19	0.413625
TUBB2C_IPI:IPI00007752.1	TUBB2C	TUBB4B	13	53	376 / 411	0.914842	29.9	310	27.3538
IMMT_IPI:IPI00009960.6	IMMT	IMMT	13	15	44 / 411	0.107056	5.4	72	0.578102
EXOC2_IPI:IPI00783559.1	EXOC2	EXOC2	13	15	4 / 411	0.00973236	1	1	0.00973236
HSPD1_IPI:IPI00784154.1	HSPD1	HSPD1	12	19	231 / 411	0.562044	17.9	165	10.0606
TUBA4A_IPI:IPI00007750.1	TUBA4A	TUBA4A	12	47	377 / 411	0.917275	28.6	242	26.2341
HSPA9_IPI:IPI00007765.5	HSPA9	HSPA9	12	15	307 / 411	0.746959	19	160	14.1922
PFKP_IPI:IPI00009790.1	PFKP	PFKP	12	19	75 / 411	0.182482	4.2	26	0.766423
CSE1L_IPI:IPI00022744.5	CSE1L	CSE1L	12	15	126 / 411	0.306569	7.1	54	2.17664
HSPA5_IPI:IPI00003362.2	HSPA5	HSPA5	11	15	360 / 411	0.875912	16.9	112	14.8029
HSP90AB1_IPI:IPI00414676.6	HSP90AB1	HSP90AB1	11	16	277 / 411	0.673966	30.7	278	20.6908
ATP2A2_IPI:IPI00177817.4	ATP2A2	ATP2A2	11	16	92 / 411	0.223844	4.3	35	0.96253
ATP5B_IPI:IPI00303476.1	ATP5B	ATP5B	11	12	211 / 411	0.513382	10	106	5.13382
RPN1_IPI:IPI00025874.2	RPN1	RPN1	11	15	91 / 411	0.221411	3.9	36	0.863504
EXOC4_IPI:IPI00059279.5	EXOC4	EXOC4	11	13	43 / 411	0.104623	1.6	5	0.167397
ACOT8_IPI:IPI00298202.1	ACOT8	ACOT8	11	21	3 / 411	0.00729927	1.3	2	0.00948905
SLC25A5_IPI:IPI00007188.5	SLC25A5	SLC25A5	11	19	223 / 411	0.542579	7.1	58	3.85231
SMC2_IPI:IPI00007927.4	SMC2	SMC2	11	12	82 / 411	0.199513	5.9	33	1.17713
FASN_IPI:IPI00026781.2	FASN	FASN	10	12	167 / 411	0.406326	49.4	548	20.0725
ATP5A1_IPI:IPI00440493.2	ATP5A1	ATP5A1	10	14	210 / 411	0.510949	11	83	5.62044
FANCI_IPI:IPI00019447.6	FANCI	FANCI	10	11	33 / 411	0.080292	2.3	8	0.184672
PRDX1_IPI:IPI00000874.1	PRDX1	PRDX1	10	18	253 / 411	0.615572	7.9	45	4.86302
TNPO1_IPI:IPI00024364.2	TNPO1	TNPO1	9	12	63 / 411	0.153285	2.3	9	0.352555
HSPA1A_IPI:IPI00304925.5	HSPA1A	HSPA1B	9	14	395 / 411	0.961071	42.9	331	41.2299
XPOT_IPI:IPI00306290.5	XPOT	XPOT	9	12	21 / 411	0.0510949	2.5	8	0.127737
CCT8_IPI:IPI00302925.4	CCT8	CCT8	9	9	183 / 411	0.445255	24.8	203	11.0423
COPA_IPI:IPI00295857.7	COPA	COPA	9	9	86 / 411	0.209246	4.8	58	1.00438
TUFM_IPI:IPI00027107.5	TUFM	TUFM	8	10	139 / 411	0.3382	8.6	53	2.90852
SERBP1_IPI:IPI00410693.3	SERBP1	SERBP1	8	10	175 / 411	0.425791	12	107	5.10949
MCCC2_IPI:IPI00784044.1	MCCC2	MCCC2	8	9	93 / 411	0.226277	41.7	391	9.43577
SLC25A3_IPI:IPI00022202.3	SLC25A3	SLC25A3	8	20	130 / 411	0.316302	4.3	49	1.3601
PCNA_IPI:IPI00021700.3	PCNA	PCNA	8	10	97 / 411	0.23601	4.8	23	1.13285
AIFM1_IPI:IPI00000690.1	AIFM1	AIFM1	8	8	101 / 411	0.245742	7.8	92	1.91679
TMPO_IPI:IPI00030131.3	TMPO	TMPO	8	12	127 / 411	0.309002	13.6	78	4.20243
KPNB1_IPI:IPI00001639.2	KPNB1	KPNB1	8	10	161 / 411	0.391727	9.5	62	3.72141
IPO7_IPI:IPI00007402.3	IPO7	IPO7	8	9	64 / 411	0.155718	3.5	14	0.545012
RPS3_IPI:IPI00011253.3	RPS3	RPS3	8	9	266 / 411	0.647202	12	56	7.76642
DBT_IPI:IPI00003944.1	DBT	DBT	8	11	89 / 411	0.216545	30.9	169	6.69124
SMC4_IPI:IPI00328298.6	SMC4	SMC4	8	8	90 / 411	0.218978	5.2	26	1.13869
MYBBP1A_IPI:IPI00005024.3	MYBBP1A	MYBBP1A	8	8	112 / 411	0.272506	8.6	51	2.34355
ILVBL_IPI:IPI00554541.2	ILVBL	ILVBL	7	13	9 / 411	0.0218978	2	6	0.0437956
UBR4_IPI:IPI00180305.7	UBR4	UBR4	7	7	36 / 411	0.0875912	15.2	76	1.33139
HSPA1L_IPI:IPI00301277.1	HSPA1L	HSPA1L	7	12	389 / 411	0.946472	22.6	189	21.3903
DNAJA2_IPI:IPI00032406.1	DNAJA2	DNAJA2	7	10	90 / 411	0.218978	3.1	9	0.678832
TRIP13_IPI:IPI00003505.3	TRIP13	TRIP13	7	8	27 / 411	0.0656934	2.2	7	0.144526
NUFIP2_IPI:IPI00002349.2	NUFIP2	NUFIP2	7	9	94 / 411	0.22871	10	50	2.2871
EMD_IPI:IPI00032003.1	EMD	EMD	7	12	82 / 411	0.199513	3.7	26	0.7382
GK_IPI:IPI00027424.3	GK	GK	7	10	6 / 411	0.0145985	1.7	3	0.0248175
KIF3A_IPI:IPI00000455.7	KIF3A	KIF3A	7	7	3 / 411	0.00729927	1.3	2	0.00948905
YWHAE_IPI:IPI00000816.1	YWHAE	YWHAE	7	8	186 / 411	0.452555	9.4	90	4.25401
USP9X_IPI:IPI00003964.4	USP9X	USP9X	7	8	66 / 411	0.160584	3.3	21	0.529927
HM13_IPI:IPI00152441.3	HM13	HM13	7	10	22 / 411	0.053528	1.2	4	0.0642336
VDAC2_IPI:IPI00024145.2	VDAC2	VDAC2	7	14	58 / 411	0.141119	8.1	51	1.14307
SLC25A1_IPI:IPI00294159.3	SLC25A1	SLC25A1	7	9	42 / 411	0.10219	3.4	14	0.347445
PHB_IPI:IPI00017334.1	PHB	PHB	7	8	85 / 411	0.206813	3.9	34	0.806569
EPRS_IPI:IPI00013452.9	EPRS	EPRS	7	7	157 / 411	0.381995	11.5	68	4.39294
TMEM165_IPI:IPI00307572.1	TMEM165	TMEM165	6	8	14 / 411	0.0340633	1.4	2	0.0476886
DDX6_IPI:IPI00030320.4	DDX6	DDX6	6	6	129 / 411	0.313869	6.3	54	1.97737
DNAJA1_IPI:IPI00012535.1	DNAJA1	DNAJA1	6	10	115 / 411	0.279805	3.6	15	1.0073
HNRNPU_IPI:IPI00479217.1	HNRNPU	HNRNPU	6	7	280 / 411	0.681265	15.8	256	10.764
ATP1A2_IPI:IPI00003021.1	ATP1A2	ATP1A2	6	12	94 / 411	0.22871	3.4	42	0.777616
TRAP1_IPI:IPI00030275.5	TRAP1	TRAP1	6	7	118 / 411	0.287105	7	43	2.00973
PCMT1_IPI:IPI00411680.9	PCMT1	PCMT1	6	10	119 / 411	0.289538	6.9	53	1.99781
CLTC_IPI:IPI00024067.4	CLTC	CLTC	6	7	180 / 411	0.437956	17.2	234	7.53285
FANCD2_IPI:IPI00075081.1	FANCD2	FANCD2	6	6	22 / 411	0.053528	1.3	3	0.0695864
ATP2A1_IPI:IPI00024804.3	ATP2A1	ATP2A1	6	7	59 / 411	0.143552	2.4	16	0.344526
MTOR_IPI:IPI00031410.1	MTOR	MTOR	6	7	10 / 411	0.0243309	1.5	6	0.0364964
MARS_IPI:IPI00008240.2	MARS	MARS	6	7	107 / 411	0.260341	6.3	30	1.64015
UBR4_IPI:IPI00640981.3	UBR4	UBR4	6	6	36 / 411	0.0875912	15.2	76	1.33139
PTPLAD1_IPI:IPI00008998.3	PTPLAD1	PTPLAD1	6	11	55 / 411	0.13382	2.5	17	0.33455
DYNC1H1_IPI:IPI00456969.1	DYNC1H1	DYNC1H1	6	6	131 / 411	0.318735	16.6	121	5.291
ILK-2_IPI:IPI00302927.6	ILK-2	Invalid identifier / gene not available	6	6		0			0
FAM62B_IPI:IPI00409635.2	FAM62B	Invalid identifier / gene not available	6	7		0			0
MTHFD1_IPI:IPI00218342.1	MTHFD1	MTHFD1	6	7	110 / 411	0.26764	8.7	106	2.32847
GPSN2_IPI:IPI00100656.3	GPSN2	Invalid identifier / gene not available	6	8		0			0
RUVBL1_IPI:IPI00021187.4	RUVBL1	RUVBL1	6	6	152 / 411	0.36983	12.4	75	4.58589
EXOC3_IPI:IPI00157734.2	EXOC3	EXOC3	6	6	5 / 411	0.0121655	1.4	2	0.0170316
CCT7_IPI:IPI00018465.1	CCT7	CCT7	6	6	172 / 411	0.418491	14.6	118	6.10998
PPP2R2A_IPI:IPI00332511.5	PPP2R2A	PPP2R2A	6	7	93 / 411	0.226277	3.2	12	0.724088
YBX1_IPI:IPI00031812.3	YBX1	YBX1	5	6	233 / 411	0.56691	7.2	101	4.08175
SCAMP3_IPI:IPI00306382.2	SCAMP3	SCAMP3	5	5	23 / 411	0.0559611	1.4	4	0.0783455
SNAP23_IPI:IPI00010438.2	SNAP23	SNAP23	5	9	41 / 411	0.0997567	3.5	15	0.349148
HNRNPK_IPI:IPI00216049.1	HNRNPK	HNRNPK	5	7	288 / 411	0.70073	16.3	143	11.4219
TIMM50_IPI:IPI00418497.1	TIMM50	TIMM50	5	6	124 / 411	0.301703	4.1	45	1.23698
VDAC3_IPI:IPI00031804.1	VDAC3	VDAC3	5	6	46 / 411	0.111922	3.9	13	0.436496
ATXN10_IPI:IPI00001636.1	ATXN10	ATXN10	5	5	26 / 411	0.0632603	1.7	4	0.107543
GBF1_IPI:IPI00021954.1	GBF1	GBF1	5	5	6 / 411	0.0145985	1.5	4	0.0218978
HEATR2_IPI:IPI00242630.3	HEATR2	HEATR2	5	6	7 / 411	0.0170316	1.3	2	0.0221411
XPO5_IPI:IPI00549861.4	XPO5	XPO5	5	6	45 / 411	0.109489	2.3	27	0.251825
TUBB_IPI:IPI00011654.2	TUBB	TUBB	5	26	382 / 411	0.92944	37.5	338	34.854
SLC1A5_IPI:IPI00019472.4	SLC1A5	SLC1A5	5	7	70 / 411	0.170316	2.9	13	0.493917
SEC63_IPI:IPI00218922.5	SEC63	SEC63	5	6	11 / 411	0.026764	2.1	11	0.0562044
RANGAP1_IPI:IPI00294879.1	RANGAP1	RANGAP1	5	5	92 / 411	0.223844	11	51	2.46229
COPB1_IPI:IPI00295851.4	COPB1	COPB1	5	6	92 / 411	0.223844	3.1	18	0.693917
SAPS1_IPI:IPI00402008.4	SAPS1	PPP6R1	5	5	19 / 411	0.0462287	2.1	5	0.0970803
CCT2_IPI:IPI00297779.7	CCT2	CCT2	5	6	180 / 411	0.437956	22.3	242	9.76642
HSP90AA1_IPI:IPI00382470.3	HSP90AA1	HSP90AA1	5	8	272 / 411	0.6618	30	327	19.854
NR3C1_IPI:IPI00022282.3	NR3C1	NR3C1	5	5	26 / 411	0.0632603	3.5	13	0.221411
CTPS_IPI:IPI00290142.5	CTPS	Invalid identifier / gene not available	5	5		0			0
XPO5_IPI:IPI00640703.3	XPO5	XPO5	5	5	45 / 411	0.109489	2.3	27	0.251825
AARS2_IPI:IPI00394788.4	AARS2	AARS2	5	5	12 / 411	0.0291971	5.9	12	0.172263
EIF4A1_IPI:IPI00025491.1	EIF4A1	EIF4A1	5	5	190 / 411	0.462287	9.2	87	4.25304
RUVBL2_IPI:IPI00009104.7	RUVBL2	RUVBL2	5	5	141 / 411	0.343066	10.4	93	3.56788
TIMM17B_IPI:IPI00219833.2	TIMM17B	TIMM17B	5	8	1 / 411	0.00243309	1	1	0.00243309
TCP1_IPI:IPI00290566.1	TCP1	TCP1	5	5	184 / 411	0.447689	18.8	148	8.41655
NUP93_IPI:IPI00397904.6	NUP93	NUP93	5	6	58 / 411	0.141119	3.8	17	0.536253
MTCH2_IPI:IPI00003833.3	MTCH2	MTCH2	5	6	26 / 411	0.0632603	2.1	4	0.132847
IQGAP1_IPI:IPI00009342.1	IQGAP1	IQGAP1	5	5	95 / 411	0.231144	5.8	55	1.34063
PABPC1_IPI:IPI00008524.1	PABPC1	PABPC1	5	5	172 / 411	0.418491	8.3	104	3.47348
KIAA0776_IPI:IPI00844000.1	KIAA0776	Invalid identifier / gene not available	5	5		0			0
CCT3_IPI:IPI00290770.3	CCT3	CCT3	5	6	165 / 411	0.40146	15.1	114	6.06204
RRM1_IPI:IPI00013871.1	RRM1	RRM1	5	5	22 / 411	0.053528	2.5	16	0.13382
CDK4_IPI:IPI00007811.1	CDK4	CDK4	5	11	27 / 411	0.0656934	2.4	28	0.157664
PRDX2_IPI:IPI00027350.3	PRDX2	PRDX2	5	6	205 / 411	0.498783	5.1	54	2.5438
UNC45A_IPI:IPI00072534.2	UNC45A	UNC45A	5	5	44 / 411	0.107056	3.1	14	0.331873
STT3A_IPI:IPI00297492.2	STT3A	STT3A	5	7	23 / 411	0.0559611	1.7	7	0.0951338
SFPQ_IPI:IPI00010740.1	SFPQ	SFPQ	5	6	201 / 411	0.489051	16.7	336	8.16715
REEP5_IPI:IPI00024670.5	REEP5	REEP5	5	5	4 / 411	0.00973236	1.5	3	0.0145985
ATAD3B_IPI:IPI00045921.1	ATAD3B	ATAD3B	5	5	59 / 411	0.143552	4.8	42	0.689051
RPS18_IPI:IPI00013296.3	RPS18	RPS18	5	5	229 / 411	0.557178	5.8	40	3.23163
EEF2_IPI:IPI00186290.6	EEF2	EEF2	5	5	207 / 411	0.50365	14.5	219	7.30292
COPG2_IPI:IPI00002557.1	COPG2	COPG2	5	5	67 / 411	0.163017	15.4	92	2.51046
YWHAQ_IPI:IPI00018146.1	YWHAQ	YWHAQ	4	7	153 / 411	0.372263	4.3	91	1.60073
RCN2_IPI:IPI00029628.1	RCN2	RCN2	4	6	126 / 411	0.306569	4	26	1.22628
FKBP8_IPI:IPI00328161.8	FKBP8	FKBP8	4	6	21 / 411	0.0510949	1.6	4	0.0817518
YME1L1_IPI:IPI00045946.4	YME1L1	YME1L1	4	4	8 / 411	0.0194647	1.1	2	0.0214112
FAR1_IPI:IPI00386139.1	FAR1	FAR1	4	5	14 / 411	0.0340633	1.4	4	0.0476886
TUBA1C_IPI:IPI00166768.3	TUBA1C	TUBA1C	4	27	389 / 411	0.946472	37	281	35.0195
C1QBP_IPI:IPI00014230.1	C1QBP	C1QBP	4	6	223 / 411	0.542579	11.4	381	6.1854
SLC25A11_IPI:IPI00219729.3	SLC25A11	SLC25A11	4	6	55 / 411	0.13382	3.1	18	0.414842
RPN2_IPI:IPI00028635.4	RPN2	RPN2	4	4	82 / 411	0.199513	2.9	29	0.578589
GLUD1_IPI:IPI00016801.1	GLUD1	GLUD1	4	6	90 / 411	0.218978	4.2	27	0.919708
PHGDH_IPI:IPI00011200.5	PHGDH	PHGDH	4	5	152 / 411	0.36983	6.2	40	2.29294
NMT1_IPI:IPI00218830.1	NMT1	NMT1	4	7	36 / 411	0.0875912	2.1	8	0.183942
HNRNPF_IPI:IPI00003881.5	HNRNPF	HNRNPF	4	5	243 / 411	0.591241	8.1	58	4.78905
RPS3A_IPI:IPI00419880.6	RPS3A	RPS3A	4	4	203 / 411	0.493917	9	51	4.44526
RPS4X_IPI:IPI00217030.1	RPS4X	RPS4X	4	6	225 / 411	0.547445	9.7	58	5.31022
NCL_IPI:IPI00444262.3	NCL	NCL	4	5	261 / 411	0.635036	16.6	99	10.5416
UGDH_IPI:IPI00031420.3	UGDH	UGDH	4	4	5 / 411	0.0121655	1	1	0.0121655
OAT_IPI:IPI00022334.1	OAT	OAT	4	7	95 / 411	0.231144	4.4	44	1.01703
COPB2_IPI:IPI00220219.6	COPB2	COPB2	4	5	79 / 411	0.192214	3.6	23	0.691971
KHSRP_IPI:IPI00479786.5	KHSRP	KHSRP	4	4	133 / 411	0.323601	9.4	79	3.04185
G3BP1_IPI:IPI00012442.1	G3BP1	G3BP1	4	5	141 / 411	0.343066	6.8	84	2.33285
HSD17B12_IPI:IPI00007676.3	HSD17B12	HSD17B12	4	4	27 / 411	0.0656934	1.9	7	0.124818
ACTB_IPI:IPI00021439.1	ACTB	ACTB	4	6	363 / 411	0.883212	36.4	716	32.1489
PCBP2_IPI:IPI00012066.2	PCBP2	PCBP2	4	5	189 / 411	0.459854	6.5	53	2.98905
PGRMC1_IPI:IPI00220739.3	PGRMC1	PGRMC1	4	4	40 / 411	0.0973236	1.6	4	0.155718
MTHFD2_IPI:IPI00011307.4	MTHFD2	MTHFD2	4	5	29 / 411	0.0705596	1.6	3	0.112895
PELO_IPI:IPI00106698.1	PELO	PELO	4	5	9 / 411	0.0218978	2.3	6	0.050365
TXN_IPI:IPI00216298.6	TXN	TXN	4	4	174 / 411	0.423358	2.6	10	1.10073
ACLY_IPI:IPI00021290.5	ACLY	ACLY	4	4	118 / 411	0.287105	12.4	118	3.5601
CDKAL1_IPI:IPI00015713.4	CDKAL1	CDKAL1	4	4	12 / 411	0.0291971	3.6	6	0.105109
USP47_IPI:IPI00165528.1	USP47	USP47	4	4	1 / 411	0.00243309	1	1	0.00243309
ABCD3_IPI:IPI00002372.1	ABCD3	ABCD3	4	4	40 / 411	0.0973236	4	12	0.389294
RPS19_IPI:IPI00215780.5	RPS19	RPS19	4	4	181 / 411	0.440389	6.6	58	2.90657
LARS_IPI:IPI00103994.4	LARS	LARS	4	4	131 / 411	0.318735	7.3	62	2.32676
IQGAP2_IPI:IPI00299048.6	IQGAP2	IQGAP2	4	4	23 / 411	0.0559611	2	9	0.111922
C14orf156_IPI:IPI00009922.3	C14ORF156	Invalid identifier / gene not available	4	5		0			0
AGK_IPI:IPI00019353.4	AGK	AGK	4	4	16 / 411	0.0389294	1.6	4	0.0622871
NCL_IPI:IPI00183526.6	NCL	NCL	4	5	261 / 411	0.635036	16.6	99	10.5416
ZW10_IPI:IPI00011631.6	ZW10	ZW10	4	4	32 / 411	0.0778589	1.6	4	0.124574
DHX9_IPI:IPI00844578.1	DHX9	DHX9	4	4	205 / 411	0.498783	15.3	169	7.63139
ERGIC1_IPI:IPI00003635.4	ERGIC1	ERGIC1	4	4	1 / 411	0.00243309	1	1	0.00243309
SPTLC2_IPI:IPI00005751.1	SPTLC2	SPTLC2	4	4	1 / 411	0.00243309	2	2	0.00486618
AAAS_IPI:IPI00024143.4	AAAS	AAAS	4	4	8 / 411	0.0194647	2	6	0.0389294
MSH6_IPI:IPI00106847.3	MSH6	MSH6	4	4	56 / 411	0.136253	3.1	19	0.422384
HLA-B_IPI:IPI00004657.1	HLA-B	HLA-B	4	4	19 / 411	0.0462287	1.4	3	0.0647202
CUL2_IPI:IPI00014311.5	CUL2	CUL2	4	4	17 / 411	0.0413625	2.2	14	0.0909976
PKM2_IPI:IPI00220644.8	PKM2	PKM	4	4	249 / 411	0.605839	17.7	181	10.7234
DNAJC7_IPI:IPI00329629.6	DNAJC7	DNAJC7	4	4	59 / 411	0.143552	2.9	10	0.416302
EEF1A2_IPI:IPI00014424.1	EEF1A2	EEF1A2	4	6	343 / 411	0.83455	13.4	175	11.183
ACTA2_IPI:IPI00008603.1	ACTA2	ACTA2	4	4	351 / 411	0.854015	18.6	294	15.8847
RPS16_IPI:IPI00221092.8	RPS16	RPS16	4	5	211 / 411	0.513382	5.9	42	3.02895
OPA1_IPI:IPI00006721.4	OPA1	OPA1	4	4	13 / 411	0.0316302	2.5	9	0.0790754
MAVS_IPI:IPI00020719.2	MAVS	MAVS	4	4	11 / 411	0.026764	1.9	7	0.0508516
PSMC5_IPI:IPI00023919.4	PSMC5	PSMC5	4	4	116 / 411	0.282238	6.3	57	1.7781
TMEM33_IPI:IPI00299084.1	TMEM33	TMEM33	4	4	34 / 411	0.0827251	1.9	6	0.157178
DNAJB6_IPI:IPI00024523.2	DNAJB6	DNAJB6	4	4	25 / 411	0.0608273	1.5	6	0.0912409
LBR_IPI:IPI00292135.1	LBR	LBR	4	5	54 / 411	0.131387	5.7	24	0.748905
ARFGEF2_IPI:IPI00002186.5	ARFGEF2	ARFGEF2	4	4	2 / 411	0.00486618	1	1	0.00486618
TOMM22_IPI:IPI00024976.5	TOMM22	TOMM22	3	3	24 / 411	0.0583942	2.7	6	0.157664
YWHAZ_IPI:IPI00021263.3	YWHAZ	YWHAZ	3	3	180 / 411	0.437956	6	36	2.62774
CLPTM1_IPI:IPI00107357.7	CLPTM1	CLPTM1	3	4	2 / 411	0.00486618	1	1	0.00486618
SYMPK_IPI:IPI00023344.2	SYMPK	SYMPK	3	3	45 / 411	0.109489	4.4	37	0.481752
ERLIN2_IPI:IPI00026942.5	ERLIN2	ERLIN2	3	4	45 / 411	0.109489	2.2	23	0.240876
RFC3_IPI:IPI00031521.1	RFC3	RFC3	3	3	37 / 411	0.0900243	1.6	6	0.144039
HNRNPH1_IPI:IPI00013881.6	HNRNPH1	HNRNPH1	3	4	263 / 411	0.639903	13.7	201	8.76667
C3orf1_IPI:IPI00299387.3	C3ORF1	Invalid identifier / gene not available	3	3		0			0
ILF2_IPI:IPI00005198.2	ILF2	ILF2	3	3	152 / 411	0.36983	5.5	53	2.03406
EXOC7_IPI:IPI00103064.4	EXOC7	EXOC7	3	3	6 / 411	0.0145985	1.2	2	0.0175182
HNRNPM_IPI:IPI00171903.2	HNRNPM	HNRNPM	3	3	220 / 411	0.53528	15.9	149	8.51095
EXOC1_IPI:IPI00019427.4	EXOC1	EXOC1	3	3	5 / 411	0.0121655	1	1	0.0121655
ARFGEF1_IPI:IPI00002188.2	ARFGEF1	ARFGEF1	3	3	3 / 411	0.00729927	1	1	0.00729927
IPO5_IPI:IPI00793443.1	IPO5	IPO5	3	3	80 / 411	0.194647	4.5	30	0.875912
PPP2R1A_IPI:IPI00168184.8	PPP2R1A	PPP2R1A	3	3	132 / 411	0.321168	5.4	43	1.73431
GAPDH_IPI:IPI00219018.7	GAPDH	GAPDH	3	4	248 / 411	0.603406	13	97	7.84428
HAX1_IPI:IPI00010440.5	HAX1	HAX1	3	5	29 / 411	0.0705596	1.7	7	0.119951
LOC442497_IPI:IPI00027493.1	LOC442497	Invalid identifier / gene not available	3	4		0			0
DDX17_IPI:IPI00023785.7	DDX17	DDX17	3	3	238 / 411	0.579075	8.4	80	4.86423
NPC1_IPI:IPI00005107.2	NPC1	NPC1	3	3	1 / 411	0.00243309	1	1	0.00243309
DDX3X_IPI:IPI00215637.5	DDX3X	DDX3X	3	4	212 / 411	0.515815	10.5	87	5.41606
SMN2_IPI:IPI00003394.1	SMN2	SMN2	3	4	49 / 411	0.119221	1.6	4	0.190754
MARCKSL1_IPI:IPI00641181.5	MARCKSL1	MARCKSL1	3	3	52 / 411	0.126521	2.2	9	0.278345
EEF1A1_IPI:IPI00025447.8	EEF1A1	EEF1A1	3	6	350 / 411	0.851582	21.9	230	18.6496
DPM1_IPI:IPI00022018.1	DPM1	DPM1	3	4	28 / 411	0.0681265	1.8	8	0.122628
TNPO3_IPI:IPI00395694.1	TNPO3	TNPO3	3	3	16 / 411	0.0389294	1.7	4	0.06618
ERLIN1_IPI:IPI00007940.6	ERLIN1	ERLIN1	3	5	29 / 411	0.0705596	1.8	9	0.127007
HSD17B4_IPI:IPI00019912.3	HSD17B4	HSD17B4	3	3	68 / 411	0.16545	4.9	48	0.810706
DHCR7_IPI:IPI00294501.1	DHCR7	DHCR7	3	5	17 / 411	0.0413625	1.8	6	0.0744526
STOML2_IPI:IPI00334190.4	STOML2	STOML2	3	3	32 / 411	0.0778589	3.3	20	0.256934
KPNA2_IPI:IPI00002214.1	KPNA2	KPNA2	3	3	162 / 411	0.394161	4.7	36	1.85255
HSPA7_IPI:IPI00011134.2	HSPA7	Invalid identifier / gene not available	3	5		0			0
AKAP8L_IPI:IPI00297455.5	AKAP8L	AKAP8L	3	3	34 / 411	0.0827251	1.6	5	0.13236
NUP205_IPI:IPI00783781.1	NUP205	NUP205	3	3	37 / 411	0.0900243	4.1	25	0.3691
RAB18_IPI:IPI00014577.1	RAB18	RAB18	3	5	12 / 411	0.0291971	1.6	4	0.0467153
ATP2B3_IPI:IPI00003831.4	ATP2B3	ATP2B3	3	3	9 / 411	0.0218978	1.3	3	0.0284672
AUP1_IPI:IPI00001891.1	AUP1	AUP1	3	3	2 / 411	0.00486618	2	2	0.00973236
MSH2_IPI:IPI00017303.1	MSH2	MSH2	3	3	45 / 411	0.109489	3	27	0.328467
PNKD_IPI:IPI00001022.5	PNKD	PNKD	3	4	10 / 411	0.0243309	1.3	2	0.0316302
KIAA0368_IPI:IPI00157790.7	KIAA0368	KIAA0368	3	3	26 / 411	0.0632603	2.3	12	0.145499
TUBB1_IPI:IPI00006510.1	TUBB1	TUBB1	3	13	291 / 411	0.708029	6.8	62	4.8146
PSMC2_IPI:IPI00021435.3	PSMC2	PSMC2	3	4	126 / 411	0.306569	5.6	45	1.71679
HSP90AA2_IPI:IPI00031523.4	HSP90AA2	Invalid identifier / gene not available	3	3		0			0
SAMM50_IPI:IPI00412713.4	SAMM50	SAMM50	3	3	8 / 411	0.0194647	3.6	12	0.070073
AGPAT9_IPI:IPI00140301.5	AGPAT9	AGPAT9	3	3	0 / 411	0	0	0	0
CABC1_IPI:IPI00176469.2	CABC1	ADCK3	3	4	11 / 411	0.026764	1.2	2	0.0321168
GALK1_IPI:IPI00019383.2	GALK1	GALK1	3	3	12 / 411	0.0291971	3	8	0.0875912
NUP133_IPI:IPI00291200.2	NUP133	NUP133	3	3	45 / 411	0.109489	5	25	0.547445
SLC25A12_IPI:IPI00386271.4	SLC25A12	SLC25A12	3	4	20 / 411	0.0486618	2.7	13	0.131387
NAP1L1_IPI:IPI00023860.1	NAP1L1	NAP1L1	3	3	152 / 411	0.36983	5.2	25	1.92311
CDC2_IPI:IPI00026689.4	CDC2	Invalid identifier / gene not available	3	3		0			0
MCM7_IPI:IPI00219740.3	MCM7	MCM7	3	3	123 / 411	0.29927	7.2	59	2.15474
UBC_IPI:IPI00179330.6	UBC	UBC	3	7	233 / 411	0.56691	6.5	90	3.68491
SSR1_IPI:IPI00301021.3	SSR1	SSR1	3	5	19 / 411	0.0462287	1.5	4	0.0693431
C10orf76_IPI:IPI00375664.1	C10ORF76	Invalid identifier / gene not available	3	3		0			0
EIF4G1_IPI:IPI00386533.3	EIF4G1	EIF4G1	3	3	102 / 411	0.248175	13.3	78	3.30073
POLDIP3_IPI:IPI00440688.4	POLDIP3	POLDIP3	3	3	79 / 411	0.192214	6.2	27	1.19173
CHCHD3_IPI:IPI00015833.1	CHCHD3	CHCHD3	3	3	16 / 411	0.0389294	4.6	31	0.179075
HSDL2_IPI:IPI00031107.1	HSDL2	HSDL2	3	3	15 / 411	0.0364964	3	8	0.109489
SKIV2L_IPI:IPI00414819.2	SKIV2L	SKIV2L	3	3	10 / 411	0.0243309	3.9	14	0.0948905
DDX5_IPI:IPI00017617.1	DDX5	DDX5	3	3	247 / 411	0.600973	8.7	86	5.22847
PHB2_IPI:IPI00027252.6	PHB2	PHB2	3	3	95 / 411	0.231144	5.9	47	1.36375
CANX_IPI:IPI00020984.2	CANX	CANX	3	4	126 / 411	0.306569	5.1	29	1.5635
CLPTM1L_IPI:IPI00151358.2	CLPTM1L	CLPTM1L	3	3	10 / 411	0.0243309	1.1	2	0.026764
PFKL_IPI:IPI00332371.9	PFKL	PFKL	3	3	67 / 411	0.163017	3.4	30	0.554258
SEC22B_IPI:IPI00006865.3	SEC22B	Invalid identifier / gene not available	3	3		0			0
BZW2_IPI:IPI00022305.4	BZW2	BZW2	3	3	15 / 411	0.0364964	2.1	5	0.0766423
BAT1_IPI:IPI00641829.5	BAT1	DDX39B	3	3	138 / 411	0.335766	6.1	38	2.04818
FARSA_IPI:IPI00031820.3	FARSA	FARSA	3	5	60 / 411	0.145985	2.9	11	0.423358
PRPF8_IPI:IPI00007928.4	PRPF8	PRPF8	3	3	161 / 411	0.391727	15	117	5.87591
QKI_IPI:IPI00385562.1	QKI	QKI	3	3	14 / 411	0.0340633	3	16	0.10219
SLC25A10_IPI:IPI00015920.2	SLC25A10	SLC25A10	3	3	32 / 411	0.0778589	3.1	16	0.241363
ATP5C1_IPI:IPI00395769.2	ATP5C1	ATP5C1	3	3	68 / 411	0.16545	3.2	20	0.52944
GNB2_IPI:IPI00003348.3	GNB2	GNB2	3	3	63 / 411	0.153285	3.6	21	0.551825
RPS6_IPI:IPI00021840.1	RPS6	RPS6	3	4	208 / 411	0.506083	6.2	63	3.13771
RPL21P19_IPI:IPI00247583.5	RPL21P19	Invalid identifier / gene not available	3	3		0			0
UQCRC2_IPI:IPI00305383.1	UQCRC2	UQCRC2	3	3	38 / 411	0.0924574	3.5	20	0.323601
SFXN1_IPI:IPI00009368.4	SFXN1	SFXN1	3	3	27 / 411	0.0656934	4.3	18	0.282482
LOC348262_IPI:IPI00746221.2	LOC348262	Invalid identifier / gene not available	3	3		0			0
PGAM5_IPI:IPI00063242.5	PGAM5	PGAM5	3	4	73 / 411	0.177616	5.2	29	0.923601
HELLS_IPI:IPI00010590.2	HELLS	HELLS	3	3	15 / 411	0.0364964	2	5	0.0729927
CNOT1_IPI:IPI00166010.6	CNOT1	CNOT1	3	3	44 / 411	0.107056	3.5	37	0.374696
DDB1_IPI:IPI00293464.5	DDB1	DDB1	3	3	103 / 411	0.250608	4.8	52	1.20292
XPO7_IPI:IPI00302458.1	XPO7	XPO7	3	3	21 / 411	0.0510949	2.1	12	0.107299
IGF2R_IPI:IPI00289819.4	IGF2R	IGF2R	3	3	20 / 411	0.0486618	1.7	5	0.0827251
MPP6_IPI:IPI00303280.4	MPP6	MPP6	3	3	4 / 411	0.00973236	1.5	3	0.0145985
RPS2_IPI:IPI00013485.3	RPS2	RPS2	3	3	210 / 411	0.510949	7.3	52	3.72993
C10orf76_IPI:IPI00646323.2	C10ORF76	Invalid identifier / gene not available	3	3		0			0
TYSND1_IPI:IPI00303214.5	TYSND1	TYSND1	3	3	1 / 411	0.00243309	1	1	0.00243309
AFG3L2_IPI:IPI00001091.4	AFG3L2	AFG3L2	3	3	21 / 411	0.0510949	3.8	11	0.194161
LPCAT2_IPI:IPI00016418.3	LPCAT2	LPCAT2	3	3	0 / 411	0	0	0	0
POLR2B_IPI:IPI00027808.1	POLR2B	POLR2B	3	3	58 / 411	0.141119	6.5	65	0.917275
KIAA1524_IPI:IPI00154283.4	KIAA1524	KIAA1524	3	3	14 / 411	0.0340633	1.9	4	0.0647202
PFAS_IPI:IPI00004534.4	PFAS	PFAS	3	3	40 / 411	0.0973236	2.9	28	0.282238
TELO2_IPI:IPI00016868.3	TELO2	TELO2	3	3	10 / 411	0.0243309	1.8	4	0.0437956
EARS2_IPI:IPI00384503.1	EARS2	EARS2	3	3	3 / 411	0.00729927	1.7	2	0.0124088
FAM105A_IPI:IPI00004563.5	FAM105A	FAM105A	3	3	0 / 411	0	0	0	0
IMPDH2_IPI:IPI00291510.3	IMPDH2	IMPDH2	3	3	83 / 411	0.201946	3.4	29	0.686618
SRPRB_IPI:IPI00295098.3	SRPRB	SRPRB	2	2	35 / 411	0.0851582	1.7	5	0.144769
NMT2_IPI:IPI00030223.3	NMT2	NMT2	2	3	15 / 411	0.0364964	1.3	2	0.0474453
CFL1_IPI:IPI00012011.6	CFL1	CFL1	2	3	196 / 411	0.476886	4.2	30	2.00292
SLC25A6_IPI:IPI00291467.7	SLC25A6	SLC25A6	2	3	201 / 411	0.489051	7	119	3.42336
TIMM23_IPI:IPI00007309.1	TIMM23	TIMM23	2	3	14 / 411	0.0340633	1.6	6	0.0545012
ATP6V1H_IPI:IPI00296191.1	ATP6V1H	ATP6V1H	2	2	18 / 411	0.0437956	1.2	3	0.0525547
RPS17_IPI:IPI00221093.7	RPS17	RPS17L	2	4	177 / 411	0.430657	4.7	42	2.02409
RPLP2_IPI:IPI00008529.1	RPLP2	RPLP2	2	2	215 / 411	0.523114	6.1	117	3.191
QSOX2_IPI:IPI00376394.4	QSOX2	QSOX2	2	2	2 / 411	0.00486618	1	1	0.00486618
GNAI2_IPI:IPI00217906.3	GNAI2	GNAI2	2	2	50 / 411	0.121655	3.9	25	0.474453
IPI:IPI00172590.6_IPI:IPI00172590.6	IPI:IPI00172590	Invalid identifier / gene not available	2	2		0			0
SV2A_IPI:IPI00644025.1	SV2A	SV2A	2	2	0 / 411	0	0	0	0
RPL11_IPI:IPI00376798.3	RPL11	RPL11	2	2	209 / 411	0.508516	3.7	20	1.88151
LEMD3_IPI:IPI00032491.1	LEMD3	LEMD3	2	2	12 / 411	0.0291971	1.5	2	0.0437956
GNAI3_IPI:IPI00220578.3	GNAI3	GNAI3	2	3	53 / 411	0.128954	4.1	40	0.52871
USP47_IPI:IPI00023584.1	USP47	USP47	2	2	1 / 411	0.00243309	1	1	0.00243309
MON2_IPI:IPI00439706.1	MON2	MON2	2	2	11 / 411	0.026764	1.8	7	0.0481752
SLC16A1_IPI:IPI00024650.1	SLC16A1	SLC16A1	2	3	47 / 411	0.114355	2.4	7	0.274453
CDKN2A_IPI:IPI00001560.2	CDKN2A	CDKN2A	2	4	25 / 411	0.0608273	1.5	6	0.0912409
PDS5A_IPI:IPI00303063.9	PDS5A	PDS5A	2	2	43 / 411	0.104623	3.3	21	0.345255
RAB34_IPI:IPI00328180.4	RAB34	RAB34	2	2	2 / 411	0.00486618	1	1	0.00486618
RTN4_IPI:IPI00021766.5	RTN4	RTN4	2	2	64 / 411	0.155718	3.8	16	0.591727
ATP5J_IPI:IPI00002521.1	ATP5J	ATP5J	2	2	10 / 411	0.0243309	1.1	2	0.026764
RER1_IPI:IPI00005728.2	RER1	RER1	2	2	2 / 411	0.00486618	1	1	0.00486618
YWHAG_IPI:IPI00220642.7	YWHAG	YWHAG	2	2	131 / 411	0.318735	4.2	50	1.33869
CNP_IPI:IPI00220993.1	CNP	CNP	2	2	26 / 411	0.0632603	1.9	8	0.120195
ARL1_IPI:IPI00219518.7	ARL1	ARL1	2	3	28 / 411	0.0681265	1.5	5	0.10219
PREB_IPI:IPI00033349.3	PREB	PREB	2	2	4 / 411	0.00973236	1.8	3	0.0175182
RPL18_IPI:IPI00215719.6	RPL18	RPL18	2	2	191 / 411	0.46472	5.3	64	2.46302
SLC27A4_IPI:IPI00101335.2	SLC27A4	SLC27A4	2	2	2 / 411	0.00486618	1	1	0.00486618
PSMA7_IPI:IPI00024175.3	PSMA7	PSMA7	2	2	89 / 411	0.216545	3.7	15	0.801217
GFPT1_IPI:IPI00217952.6	GFPT1	GFPT1	2	2	15 / 411	0.0364964	2.8	16	0.10219
ABCC1_IPI:IPI00008338.1	ABCC1	ABCC1	2	2	3 / 411	0.00729927	2	3	0.0145985
RPL19_IPI:IPI00025329.1	RPL19	RPL19	2	2	210 / 411	0.510949	3.8	67	1.94161
ENDOD1_IPI:IPI00001952.5	ENDOD1	ENDOD1	2	2	1 / 411	0.00243309	1	1	0.00243309
RBM39_IPI:IPI00163505.2	RBM39	RBM39	2	2	163 / 411	0.396594	11.1	85	4.40219
MAGED2_IPI:IPI00009542.1	MAGED2	MAGED2	2	2	43 / 411	0.104623	2.7	12	0.282482
STK24_IPI:IPI00002212.1	STK24	STK24	2	2	15 / 411	0.0364964	1.3	4	0.0474453
RPTOR_IPI:IPI00166044.1	RPTOR	RPTOR	2	3	3 / 411	0.00729927	1.3	2	0.00948905
SAPS3_IPI:IPI00019540.1	SAPS3	PPP6R3	2	2	37 / 411	0.0900243	2	9	0.180049
CHP_IPI:IPI00218924.5	CHP	Invalid identifier / gene not available	2	2		0			0
SCML1_IPI:IPI00186157.3	SCML1	SCML1	2	2	1 / 411	0.00243309	1	1	0.00243309
RPL22_IPI:IPI00219153.4	RPL22	RPL22	2	2	192 / 411	0.467153	3.3	26	1.54161
RPS8_IPI:IPI00216587.9	RPS8	RPS8	2	2	228 / 411	0.554745	7.4	51	4.10511
CKAP5_IPI:IPI00028275.2	CKAP5	CKAP5	2	2	84 / 411	0.20438	9.4	45	1.92117
CDK3_IPI:IPI00023503.4	CDK3	CDK3	2	2	44 / 411	0.107056	1.8	5	0.192701
C22orf28_IPI:IPI00550689.3	C22ORF28	Invalid identifier / gene not available	2	2		0			0
CSDA_IPI:IPI00031801.4	CSDA	Invalid identifier / gene not available	2	3		0			0
MARCKS_IPI:IPI00219301.7	MARCKS	MARCKS	2	2	95 / 411	0.231144	2.8	14	0.647202
RPS14_IPI:IPI00026271.5	RPS14	RPS14	2	3	259 / 411	0.63017	4.6	33	2.89878
CYBA_IPI:IPI00218433.5	CYBA	CYBA	2	3	0 / 411	0	0	0	0
DLST_IPI:IPI00384122.5	DLST	DLST	2	2	57 / 411	0.138686	3.7	20	0.513139
MCCC1_IPI:IPI00024580.4	MCCC1	MCCC1	2	3	88 / 411	0.214112	44.2	272	9.46375
LSM12_IPI:IPI00410324.2	LSM12	LSM12	2	2	80 / 411	0.194647	2.7	13	0.525547
XRCC6_IPI:IPI00644712.4	XRCC6	XRCC6	2	2	176 / 411	0.428224	9	71	3.85401
RGS3_IPI:IPI00168858.1	RGS3	RGS3	2	4	1 / 411	0.00243309	1	1	0.00243309
RPL4_IPI:IPI00003918.6	RPL4	RPL4	2	2	197 / 411	0.479319	9.6	81	4.60146
HNRNPA2B1_IPI:IPI00386854.6	HNRNPA2B1	HNRNPA2B1	2	2	262 / 411	0.63747	11.3	67	7.20341
PSMD3_IPI:IPI00011603.2	PSMD3	PSMD3	2	3	111 / 411	0.270073	6.2	34	1.67445
SNRNP70_IPI:IPI00219483.1	SNRNP70	SNRNP70	2	2	108 / 411	0.262774	5.1	52	1.34015
SMC3_IPI:IPI00219420.3	SMC3	SMC3	2	2	73 / 411	0.177616	6.6	51	1.17226
RPL3_IPI:IPI00550021.4	RPL3	RPL3	2	2	163 / 411	0.396594	10.5	142	4.16423
ATP2B1_IPI:IPI00021695.1	ATP2B1	ATP2B1	2	2	12 / 411	0.0291971	2.1	5	0.0613139
ZDHHC13_IPI:IPI00410663.1	ZDHHC13	ZDHHC13	2	2	0 / 411	0	0	0	0
ATP2A3_IPI:IPI00004092.2	ATP2A3	ATP2A3	2	2	35 / 411	0.0851582	2.7	20	0.229927
TUBB2A_IPI:IPI00013475.1	TUBB2A	TUBB2A	2	2	372 / 411	0.905109	26.4	299	23.8949
RPS25_IPI:IPI00012750.3	RPS25	RPS25	2	2	196 / 411	0.476886	4.4	20	2.0983
NSUN2_IPI:IPI00306369.3	NSUN2	NSUN2	2	2	78 / 411	0.189781	3.6	19	0.683212
MYO1C_IPI:IPI00010418.5	MYO1C	MYO1C	2	2	66 / 411	0.160584	10.7	69	1.71825
HNRNPR_IPI:IPI00012074.3	HNRNPR	HNRNPR	2	2	188 / 411	0.457421	7.7	173	3.52214
LPCAT1_IPI:IPI00171626.3	LPCAT1	LPCAT1	2	3	7 / 411	0.0170316	1.4	4	0.0238443
CLPB_IPI:IPI00006615.3	CLPB	CLPB	2	2	30 / 411	0.0729927	1.4	5	0.10219
TAF15_IPI:IPI00020194.1	TAF15	TAF15	2	2	163 / 411	0.396594	4.9	35	1.94331
WDR61_IPI:IPI00019269.3	WDR61	WDR61	2	3	48 / 411	0.116788	2.6	16	0.30365
SLC7A5_IPI:IPI00008986.1	SLC7A5	SLC7A5	2	2	35 / 411	0.0851582	3.4	11	0.289538
IPI:IPI00719051.3_IPI:IPI00719051.3	IPI:IPI00719051	Invalid identifier / gene not available	2	2		0			0
SAMHD1_IPI:IPI00294739.1	SAMHD1	SAMHD1	2	3	18 / 411	0.0437956	2.3	13	0.10073
CDS2_IPI:IPI00032150.3	CDS2	CDS2	2	2	1 / 411	0.00243309	1	1	0.00243309
FAM134C_IPI:IPI00254338.2	FAM134C	FAM134C	2	2	0 / 411	0	0	0	0
EEF1G_IPI:IPI00000875.7	EEF1G	EEF1G	2	2	193 / 411	0.469586	7.6	41	3.56886
RPL7_IPI:IPI00030179.3	RPL7	RPL7	2	2	175 / 411	0.425791	7.3	66	3.10827
GGT7_IPI:IPI00030634.2	GGT7	GGT7	2	2	4 / 411	0.00973236	1.3	2	0.0126521
RPL23_IPI:IPI00010153.5	RPL23	RPL23	2	2	243 / 411	0.591241	5.7	48	3.37007
SIP1_IPI:IPI00024281.1	SIP1	Invalid identifier / gene not available	2	2		0			0
SLC6A15_IPI:IPI00018071.2	SLC6A15	SLC6A15	2	2	3 / 411	0.00729927	1.7	2	0.0124088
IKBKAP_IPI:IPI00293735.2	IKBKAP	IKBKAP	2	2	36 / 411	0.0875912	2.1	15	0.183942
DOPEY2_IPI:IPI00294653.2	DOPEY2	DOPEY2	2	2	4 / 411	0.00973236	1	1	0.00973236
EXD2_IPI:IPI00465113.2	EXD2	EXD2	2	2	1 / 411	0.00243309	1	1	0.00243309
RANBP2_IPI:IPI00221325.3	RANBP2	RANBP2	2	2	90 / 411	0.218978	36.8	222	8.05839
KIF5B_IPI:IPI00012837.1	KIF5B	KIF5B	2	2	97 / 411	0.23601	8.3	48	1.95888
TARDBP_IPI:IPI00025815.2	TARDBP	TARDBP	2	2	91 / 411	0.221411	3	18	0.664234
MRPS18B_IPI:IPI00022316.3	MRPS18B	MRPS18B	2	2	27 / 411	0.0656934	1.9	6	0.124818
TMEM48_IPI:IPI00003455.3	TMEM48	Invalid identifier / gene not available	2	2		0			0
SYNCRIP_IPI:IPI00018140.3	SYNCRIP	SYNCRIP	2	2	197 / 411	0.479319	6.9	97	3.3073
HIST1H1C_IPI:IPI00217465.5	HIST1H1C	HIST1H1C	2	2	301 / 411	0.73236	10.4	76	7.61655
GIT1_IPI:IPI00384861.3	GIT1	GIT1	2	2	9 / 411	0.0218978	1	1	0.0218978
RPL31_IPI:IPI00026302.3	RPL31	RPL31	2	3	170 / 411	0.413625	3.2	21	1.3236
SLC2A1_IPI:IPI00220194.6	SLC2A1	SLC2A1	2	2	21 / 411	0.0510949	2.6	20	0.132847
C1orf57_IPI:IPI00031570.1	C1ORF57	NTPCR	2	2	37 / 411	0.0900243	2.2	6	0.198054
NDUFS3_IPI:IPI00025796.3	NDUFS3	NDUFS3	2	2	19 / 411	0.0462287	2.3	9	0.106326
PDK3_IPI:IPI00014849.3	PDK3	PDK3	2	2	6 / 411	0.0145985	1.2	2	0.0175182
NCAPD2_IPI:IPI00299524.1	NCAPD2	NCAPD2	2	2	52 / 411	0.126521	3.1	17	0.392214
MCM5_IPI:IPI00018350.3	MCM5	MCM5	2	3	100 / 411	0.243309	5	34	1.21655
PCBP1_IPI:IPI00016610.2	PCBP1	PCBP1	2	2	194 / 411	0.472019	8.2	108	3.87056
NPM1_IPI:IPI00220740.1	NPM1	NPM1	2	2	252 / 411	0.613139	16.4	172	10.0555
KIF11_IPI:IPI00305289.2	KIF11	KIF11	2	3	163 / 411	0.396594	37.4	670	14.8326
YIPF5_IPI:IPI00334657.7	YIPF5	YIPF5	2	2	7 / 411	0.0170316	1.1	2	0.0187348
AP3D1_IPI:IPI00289608.4	AP3D1	AP3D1	2	2	73 / 411	0.177616	2.8	15	0.497324
IRAK1_IPI:IPI00060149.2	IRAK1	IRAK1	2	3	13 / 411	0.0316302	4.7	9	0.148662
PDIA6_IPI:IPI00299571.5	PDIA6	PDIA6	2	2	129 / 411	0.313869	6.7	52	2.10292
PSMD4_IPI:IPI00022694.3	PSMD4	PSMD4	2	2	73 / 411	0.177616	3.3	11	0.586131
MMS19_IPI:IPI00154451.9	MMS19	MMS19	2	2	25 / 411	0.0608273	1.7	5	0.103406
BAG2_IPI:IPI00000643.1	BAG2	BAG2	2	3	96 / 411	0.233577	2.9	20	0.677372
MYL6B_IPI:IPI00027255.1	MYL6B	MYL6B	2	2	143 / 411	0.347932	1.7	6	0.591484
FASTKD5_IPI:IPI00414973.1	FASTKD5	FASTKD5	2	2	7 / 411	0.0170316	1.3	3	0.0221411
PRDX4_IPI:IPI00011937.1	PRDX4	PRDX4	2	2	161 / 411	0.391727	2.8	30	1.09684
SURF4_IPI:IPI00005737.1	SURF4	SURF4	2	2	35 / 411	0.0851582	2.3	7	0.195864
G3BP2_IPI:IPI00009057.2	G3BP2	G3BP2	2	2	59 / 411	0.143552	2.9	24	0.416302
STEAP3_IPI:IPI00019350.6	STEAP3	STEAP3	2	2	0 / 411	0	0	0	0
RPS9_IPI:IPI00221088.5	RPS9	RPS9	2	2	170 / 411	0.413625	6	35	2.48175
PABPC4_IPI:IPI00012726.4	PABPC4	PABPC4	2	2	142 / 411	0.345499	6.7	72	2.31484
FANCI_IPI:IPI00306518.3	FANCI	FANCI	2	2	33 / 411	0.080292	2.3	8	0.184672
NDUFS2_IPI:IPI00025239.2	NDUFS2	NDUFS2	2	2	14 / 411	0.0340633	2	7	0.0681265
ARMC6_IPI:IPI00020196.5	ARMC6	ARMC6	2	2	3 / 411	0.00729927	1.3	2	0.00948905
ABCC4_IPI:IPI00006675.2	ABCC4	ABCC4	2	2	2 / 411	0.00486618	2	3	0.00973236
RPL28_IPI:IPI00182533.5	RPL28	RPL28	2	2	109 / 411	0.265207	5.7	24	1.51168
ALG1_IPI:IPI00549761.3	ALG1	ALG1	2	2	4 / 411	0.00973236	1	1	0.00973236
LOC389842_IPI:IPI00399212.3	LOC389842	Invalid identifier / gene not available	2	2		0			0
STRAP_IPI:IPI00294536.2	STRAP	STRAP	2	2	93 / 411	0.226277	4.5	27	1.01825
ENO1_IPI:IPI00465248.5	ENO1	ENO1	2	2	223 / 411	0.542579	17.7	163	9.60365
RPL27A_IPI:IPI00456758.4	RPL27A	RPL27A	2	2	198 / 411	0.481752	3.2	19	1.54161
BSG_IPI:IPI00019906.1	BSG	BSG	2	2	40 / 411	0.0973236	2	6	0.194647
NDUFA4_IPI:IPI00011770.1	NDUFA4	NDUFA4	2	2	7 / 411	0.0170316	1.4	3	0.0238443
RABGAP1_IPI:IPI00016702.4	RABGAP1	RABGAP1	2	2	8 / 411	0.0194647	1.3	2	0.0253041
LDHB_IPI:IPI00219217.3	LDHB	LDHB	2	2	164 / 411	0.399027	7.2	92	2.87299
RAB1A_IPI:IPI00005719.1	RAB1A	RAB1A	2	2	69 / 411	0.167883	3.9	16	0.654745
ABHD12_IPI:IPI00060569.1	ABHD12	ABHD12	2	3	1 / 411	0.00243309	1	1	0.00243309
IPI:IPI00176692.7_IPI:IPI00176692.7	IPI:IPI00176692	Invalid identifier / gene not available	2	2		0			0
PYCRL_IPI:IPI00604402.2	PYCRL	PYCRL	2	2	7 / 411	0.0170316	1	1	0.0170316
RGP1_IPI:IPI00021987.3	RGP1	RGP1	2	2	0 / 411	0	0	0	0
SMC1A_IPI:IPI00291939.1	SMC1A	SMC1A	2	2	79 / 411	0.192214	5.7	50	1.09562
PSME3_IPI:IPI00030243.1	PSME3	PSME3	2	2	68 / 411	0.16545	4.4	15	0.727981
ATG9A_IPI:IPI00383396.9	ATG9A	ATG9A	2	2	0 / 411	0	0	0	0
ALDH3A2_IPI:IPI00333619.4	ALDH3A2	ALDH3A2	2	2	29 / 411	0.0705596	2.3	12	0.162287
TTC37_IPI:IPI00005634.3	TTC37	TTC37	2	2	15 / 411	0.0364964	2.7	12	0.0985401
TBCD_IPI:IPI00030774.2	TBCD	TBCD	2	2	12 / 411	0.0291971	2	12	0.0583942
NDUFB10_IPI:IPI00074489.1	NDUFB10	NDUFB10	2	2	10 / 411	0.0243309	1.2	2	0.0291971
TMEM48_IPI:IPI00074330.7	TMEM48	Invalid identifier / gene not available	2	2		0			0
USP7_IPI:IPI00003965.5	USP7	USP7	2	2	65 / 411	0.158151	4.1	18	0.648418
EFTUD2_IPI:IPI00003519.1	EFTUD2	EFTUD2	2	3	162 / 411	0.394161	10.8	82	4.25693
VCP_IPI:IPI00022774.3	VCP	VCP	2	2	167 / 411	0.406326	20.1	134	8.16715
VAPB_IPI:IPI00006211.4	VAPB	VAPB	2	2	28 / 411	0.0681265	1.9	9	0.12944
PRMT5_IPI:IPI00064328.3	PRMT5	PRMT5	2	2	175 / 411	0.425791	156.6	2950	66.6788
NME1_IPI:IPI00012048.1	NME1	NME1	2	2	123 / 411	0.29927	4.1	22	1.22701
ATR_IPI:IPI00412298.3	ATR	ATR	2	2	1 / 411	0.00243309	2	2	0.00486618
MTHFD1L_IPI:IPI00291646.3	MTHFD1L	MTHFD1L	2	2	75 / 411	0.182482	5.5	40	1.00365
LPCAT4_IPI:IPI00385128.3	LPCAT4	LPCAT4	2	2	0 / 411	0	0	0	0
SF3B1_IPI:IPI00026089.3	SF3B1	SF3B1	2	2	171 / 411	0.416058	17.8	142	7.40584
AGPAT3_IPI:IPI00217814.1	AGPAT3	AGPAT3	2	2	0 / 411	0	0	0	0
CCT5_IPI:IPI00010720.1	CCT5	CCT5	2	2	182 / 411	0.442822	17.9	119	7.92652
RPS5_IPI:IPI00008433.4	RPS5	RPS5	2	2	160 / 411	0.389294	4.1	21	1.59611
LUC7L2_IPI:IPI00006932.4	LUC7L2	C7orf55-LUC7L2	2	2	151 / 411	0.367397	15.8	106	5.80487
ASNS_IPI:IPI00554777.2	ASNS	ASNS	2	2	42 / 411	0.10219	3.3	17	0.337226
NCAPH2_IPI:IPI00465227.5	NCAPH2	NCAPH2	2	2	1 / 411	0.00243309	1	1	0.00243309
DNAJA3_IPI:IPI00179187.3	DNAJA3	DNAJA3	2	2	33 / 411	0.080292	1.8	4	0.144526
LGALS3BP_IPI:IPI00023673.1	LGALS3BP	LGALS3BP	2	2	25 / 411	0.0608273	13.7	74	0.833333
ACSL4_IPI:IPI00029737.1	ACSL4	ACSL4	2	2	39 / 411	0.0948905	1.2	4	0.113869
NOMO1_IPI:IPI00329352.3	NOMO1	NOMO1	2	2	19 / 411	0.0462287	1.6	12	0.0739659
ANXA2P2_IPI:IPI00334627.3	ANXA2P2	Invalid identifier / gene not available	2	2		0			0
COG5_IPI:IPI00007347.4	COG5	COG5	2	2	2 / 411	0.00486618	1	1	0.00486618
TMX1_IPI:IPI00395887.4	TMX1	TMX1	2	2	23 / 411	0.0559611	1.2	2	0.0671533
CDK5_IPI:IPI00023530.7	CDK5	CDK5	2	2	25 / 411	0.0608273	1.3	4	0.0790754
DLD_IPI:IPI00015911.1	DLD	DLD	2	2	84 / 411	0.20438	6.3	38	1.28759
EIF3K_IPI:IPI00033143.1	EIF3K	EIF3K	2	2	58 / 411	0.141119	1.5	5	0.211679
SEC61B_IPI:IPI00220835.7	SEC61B	SEC61B	2	2	35 / 411	0.0851582	1.5	4	0.127737
ATP1B1_IPI:IPI00747849.2	ATP1B1	ATP1B1	2	2	1 / 411	0.00243309	1	1	0.00243309
TUBA1A_IPI:IPI00180675.4	TUBA1A	TUBA1A	1	1	389 / 411	0.946472	34.9	299	33.0319
CHCHD4_IPI:IPI00177428.1	CHCHD4	CHCHD4	1	1	17 / 411	0.0413625	2.9	7	0.119951
DNAJC11_IPI:IPI00027984.4	DNAJC11	DNAJC11	1	1	10 / 411	0.0243309	1.2	2	0.0291971
TUBA1C_IPI:IPI00218343.4	TUBA1C	TUBA1C	1	1	389 / 411	0.946472	37	281	35.0195
RHOT2_IPI:IPI00465059.4	RHOT2	RHOT2	1	1	9 / 411	0.0218978	1.3	2	0.0284672
ASPH_IPI:IPI00024572.3	ASPH	ASPH	1	1	14 / 411	0.0340633	1.9	4	0.0647202
THOC4_IPI:IPI00328840.9	THOC4	Invalid identifier / gene not available	1	1		0			0
PIGA_IPI:IPI00020966.1	PIGA	PIGA	1	1	0 / 411	0	0	0	0
P4HB_IPI:IPI00010796.1	P4HB	P4HB	1	1	115 / 411	0.279805	4.7	60	1.31509
ADCK4_IPI:IPI00171777.3	ADCK4	ADCK4	1	1	0 / 411	0	0	0	0
SLC1A3_IPI:IPI00015473.3	SLC1A3	SLC1A3	1	1	7 / 411	0.0170316	1	1	0.0170316
PGRMC2_IPI:IPI00005202.2	PGRMC2	PGRMC2	1	1	35 / 411	0.0851582	3.2	10	0.272506
ATP1A2_IPI:IPI00647102.4	ATP1A2	ATP1A2	1	1	94 / 411	0.22871	3.4	42	0.777616
PPP6C_IPI:IPI00012970.1	PPP6C	PPP6C	1	1	14 / 411	0.0340633	2.1	3	0.0715328
MAT2A_IPI:IPI00010157.1	MAT2A	MAT2A	1	1	64 / 411	0.155718	1.9	9	0.295864
AGPAT5_IPI:IPI00028491.4	AGPAT5	AGPAT5	1	1	3 / 411	0.00729927	5	8	0.0364964
CDC27_IPI:IPI00294575.7	CDC27	CDC27	1	1	24 / 411	0.0583942	2.3	6	0.134307
ERCC2_IPI:IPI00029728.3	ERCC2	ERCC2	1	1	1 / 411	0.00243309	1	1	0.00243309
BRI3BP_IPI:IPI00103599.1	BRI3BP	BRI3BP	1	1	5 / 411	0.0121655	1.2	2	0.0145985
SMC4_IPI:IPI00411559.2	SMC4	SMC4	1	1	90 / 411	0.218978	5.2	26	1.13869
RBBP4_IPI:IPI00328319.8	RBBP4	RBBP4	1	1	148 / 411	0.360097	4	22	1.44039
NMT1_IPI:IPI00329692.3	NMT1	NMT1	1	1	36 / 411	0.0875912	2.1	8	0.183942
HSP90AB1_IPI:IPI00411633.4	HSP90AB1	HSP90AB1	1	1	277 / 411	0.673966	30.7	278	20.6908
ILF3_IPI:IPI00219330.2	ILF3	ILF3	1	1	158 / 411	0.384428	9.4	99	3.61363
SLC39A14_IPI:IPI00014236.6	SLC39A14	SLC39A14	1	1	2 / 411	0.00486618	1	1	0.00486618
FAM62A_IPI:IPI00022143.3	FAM62A	Invalid identifier / gene not available	1	1		0			0
HLA-A_IPI:IPI00026569.3	HLA-A	HLA-A	1	1	30 / 411	0.0729927	1.4	5	0.10219
COG2_IPI:IPI00000057.1	COG2	COG2	1	1	4 / 411	0.00973236	1	1	0.00973236
LRRC41_IPI:IPI00025516.1	LRRC41	LRRC41	1	1	4 / 411	0.00973236	1	1	0.00973236
C20orf4_IPI:IPI00166013.1	C20ORF4	Invalid identifier / gene not available	1	1		0			0
UBXN1_IPI:IPI00027378.5	UBXN1	UBXN1	1	1	6 / 411	0.0145985	1.3	2	0.0189781
EXOC8_IPI:IPI00028264.3	EXOC8	EXOC8	1	1	2 / 411	0.00486618	1	1	0.00486618
IPI:IPI00908469.1_IPI:IPI00908469.1	IPI:IPI00908469	Invalid identifier / gene not available	1	1		0			0
HSPC152_IPI:IPI00009010.3	HSPC152	Invalid identifier / gene not available	1	1		0			0
MBLAC2_IPI:IPI00293336.5	MBLAC2	MBLAC2	1	1	1 / 411	0.00243309	1	1	0.00243309
C2orf43_IPI:IPI00030257.3	C2ORF43	Invalid identifier / gene not available	1	1		0			0
CLTCL1_IPI:IPI00022881.1	CLTCL1	CLTCL1	1	1	106 / 411	0.257908	6	47	1.54745
GLMN_IPI:IPI00074604.1	GLMN	GLMN	1	1	9 / 411	0.0218978	1	1	0.0218978
NME3_IPI:IPI00012315.2	NME3	NME3	1	1	5 / 411	0.0121655	1.2	2	0.0145985
IARS_IPI:IPI00644127.2	IARS	IARS	1	1	106 / 411	0.257908	7.4	65	1.90852
MYO6_IPI:IPI00008455.1	MYO6	MYO6	1	1	42 / 411	0.10219	6	50	0.613139
HLA-C_IPI:IPI00026650.1	HLA-C	HLA-C	1	1	26 / 411	0.0632603	1.4	4	0.0885645
COG8_IPI:IPI00140201.4	COG8	COG8	1	1	0 / 411	0	0	0	0
PTPRS_IPI:IPI00289831.4	PTPRS	PTPRS	1	1	0 / 411	0	0	0	0
IPI:IPI00384397.1_IPI:IPI00384397.1	IPI:IPI00384397	Invalid identifier / gene not available	1	1		0			0
LAS1L_IPI:IPI00009917.3	LAS1L	LAS1L	1	1	50 / 411	0.121655	3.1	14	0.377129
SSR3_IPI:IPI00009235.2	SSR3	SSR3	1	1	19 / 411	0.0462287	1.5	5	0.0693431
SLC25A19_IPI:IPI00028068.3	SLC25A19	SLC25A19	1	1	1 / 411	0.00243309	3	3	0.00729927
ARD1A_IPI:IPI00013184.1	ARD1A	Invalid identifier / gene not available	1	1		0			0
ACTBL2_IPI:IPI00003269.1	ACTBL2	ACTBL2	1	1	329 / 411	0.800487	9.1	129	7.28443
MLLT11_IPI:IPI00011421.1	MLLT11	MLLT11	1	1	8 / 411	0.0194647	1.3	3	0.0253041
AGPAT1_IPI:IPI00019141.1	AGPAT1	AGPAT1	1	1	4 / 411	0.00973236	1.8	2	0.0175182
EIF2S1_IPI:IPI00219678.3	EIF2S1	EIF2S1	1	1	101 / 411	0.245742	2.3	10	0.565207
IPO5_IPI:IPI00639960.1	IPO5	IPO5	1	1	80 / 411	0.194647	4.5	30	0.875912
IPI:IPI00069693.4_IPI:IPI00069693.4	IPI:IPI00069693	Invalid identifier / gene not available	1	1		0			0
SARS2_IPI:IPI00328361.7	SARS2	SARS2	1	1	31 / 411	0.0754258	2	11	0.150852
IPI:IPI00179589.4_IPI:IPI00179589.4	IPI:IPI00179589	Invalid identifier / gene not available	1	1		0			0
C19orf52_IPI:IPI00157215.5	C19ORF52	C19orf52	1	1	2 / 411	0.00486618	1	1	0.00486618
CDC26_IPI:IPI00169387.1	CDC26	CDC26	1	1	1 / 411	0.00243309	1	1	0.00243309
SARM1_IPI:IPI00448630.1	SARM1	SARM1	1	1	1 / 411	0.00243309	3	3	0.00729927
NSF_IPI:IPI00006451.6	NSF	NSF	1	1	31 / 411	0.0754258	2	5	0.150852
IPI:IPI00556589.3_IPI:IPI00556589.3	IPI:IPI00556589	Invalid identifier / gene not available	1	1		0			0
SKP1_IPI:IPI00301364.3	SKP1	SKP1	1	1	145 / 411	0.352798	3.2	63	1.12895
EIF3G_IPI:IPI00290460.3	EIF3G	EIF3G	1	1	109 / 411	0.265207	4.3	38	1.14039
SLC25A21_IPI:IPI00012690.1	SLC25A21	SLC25A21	1	1	0 / 411	0	0	0	0
ERAL1_IPI:IPI00026512.2	ERAL1	ERAL1	1	1	10 / 411	0.0243309	2.7	5	0.0656934
HSDL1_IPI:IPI00171459.3	HSDL1	HSDL1	1	1	2 / 411	0.00486618	1	1	0.00486618
NAMPT_IPI:IPI00018873.1	NAMPT	NAMPT	1	1	34 / 411	0.0827251	3.5	10	0.289538
PCCA_IPI:IPI00552419.2	PCCA	PCCA	1	1	94 / 411	0.22871	67.1	342	15.3465
SLC38A2_IPI:IPI00410034.2	SLC38A2	SLC38A2	1	1	15 / 411	0.0364964	2.2	7	0.080292
FDFT1_IPI:IPI00020944.1	FDFT1	FDFT1	1	1	9 / 411	0.0218978	1	1	0.0218978
RPS10_IPI:IPI00008438.1	RPS10	RPS10	1	1	177 / 411	0.430657	5.4	32	2.32555
TMEM184C_IPI:IPI00019373.2	TMEM184C	TMEM184C	1	1	0 / 411	0	0	0	0
UQCRFS1_IPI:IPI00026964.2	UQCRFS1	UQCRFS1	1	1	10 / 411	0.0243309	1.6	2	0.0389294
C14orf166_IPI:IPI00006980.1	C14ORF166	C14orf166	1	2	92 / 411	0.223844	3.7	15	0.828224
ATP5D_IPI:IPI00024920.1	ATP5D	ATP5D	1	1	21 / 411	0.0510949	1.3	3	0.0664234
MGST3_IPI:IPI00024266.3	MGST3	MGST3	1	1	7 / 411	0.0170316	1.7	4	0.0289538
SKP1_IPI:IPI00172421.7	SKP1	SKP1	1	1	145 / 411	0.352798	3.2	63	1.12895
IGHA1_IPI:IPI00383164.1	IGHA1	Invalid identifier / gene not available	1	1		0			0
GSTK1_IPI:IPI00219673.6	GSTK1	GSTK1	1	1	10 / 411	0.0243309	1.3	2	0.0316302
TUBB2B_IPI:IPI00031370.3	TUBB2B	TUBB2B	1	1	372 / 411	0.905109	26.6	301	24.0759
PRAF2_IPI:IPI00026994.3	PRAF2	PRAF2	1	1	6 / 411	0.0145985	1	1	0.0145985
VPS16A_IPI:IPI00305438.3	VPS16A	Invalid identifier / gene not available	1	1		0			0
GPR89A_IPI:IPI00472858.9	GPR89A	GPR89B	1	1	1 / 411	0.00243309	1	1	0.00243309
RPL29P30_IPI:IPI00052885.7	RPL29P30	Invalid identifier / gene not available	1	1		0			0
IPO5_IPI:IPI00514205.2	IPO5	IPO5	1	1	80 / 411	0.194647	4.5	30	0.875912
SLC39A7_IPI:IPI00021888.5	SLC39A7	SLC39A7	1	1	11 / 411	0.026764	1	1	0.026764
SERPINH1_IPI:IPI00032140.4	SERPINH1	SERPINH1	1	1	78 / 411	0.189781	5.7	32	1.08175
GTF2I_IPI:IPI00054042.1	GTF2I	GTF2I	1	1	141 / 411	0.343066	14	71	4.80292
RPL5_IPI:IPI00000494.6	RPL5	RPL5	1	1	156 / 411	0.379562	6.8	55	2.58102
RPL13P12_IPI:IPI00397611.2	RPL13P12	Invalid identifier / gene not available	1	1		0			0
PMM1_IPI:IPI00294903.3	PMM1	PMM1	1	1	1 / 411	0.00243309	1	1	0.00243309
SCD_IPI:IPI00299468.3	SCD	SCD	1	1	6 / 411	0.0145985	1.2	2	0.0175182
APOL2_IPI:IPI00220007.6	APOL2	APOL2	1	1	2 / 411	0.00486618	1.5	2	0.00729927
KCMF1_IPI:IPI00306661.3	KCMF1	KCMF1	1	1	11 / 411	0.026764	1.4	2	0.0374696
NF1_IPI:IPI00299512.4	NF1	NF1	1	1	8 / 411	0.0194647	1.3	3	0.0253041
BCKDHA_IPI:IPI00025100.1	BCKDHA	BCKDHA	1	1	52 / 411	0.126521	14	69	1.77129
RPS24_IPI:IPI00029750.1	RPS24	RPS24	1	1	179 / 411	0.435523	4.7	36	2.04696
RANBP6_IPI:IPI00514622.2	RANBP6	RANBP6	1	1	12 / 411	0.0291971	1.2	2	0.0350365
RPS7_IPI:IPI00013415.1	RPS7	RPS7	1	1	200 / 411	0.486618	5.9	27	2.87105
ATP4A_IPI:IPI00218919.7	ATP4A	ATP4A	1	1	64 / 411	0.155718	1.6	9	0.249148
GEMIN4_IPI:IPI00027717.1	GEMIN4	GEMIN4	1	1	44 / 411	0.107056	2.3	15	0.246229
CNNM4_IPI:IPI00418426.6	CNNM4	CNNM4	1	1	0 / 411	0	0	0	0
EIF3B_IPI:IPI00396370.6	EIF3B	EIF3B	1	1	108 / 411	0.262774	5.4	42	1.41898
TIMM13_IPI:IPI00001589.1	TIMM13	TIMM13	1	1	65 / 411	0.158151	4.7	38	0.743309
MYL6_IPI:IPI00335168.9	MYL6	MYL6	1	1	190 / 411	0.462287	4.5	42	2.08029
RPL17_IPI:IPI00413324.6	RPL17	RPL17-C18orf32	1	1	190 / 411	0.462287	4.6	29	2.12652
M6PR_IPI:IPI00025049.1	M6PR	M6PR	1	1	3 / 411	0.00729927	1	1	0.00729927
TMTC3_IPI:IPI00470924.2	TMTC3	TMTC3	1	1	0 / 411	0	0	0	0
TMEM109_IPI:IPI00031697.1	TMEM109	TMEM109	1	1	29 / 411	0.0705596	1.4	3	0.0987835
PUM1_IPI:IPI00032355.3	PUM1	PUM1	1	1	24 / 411	0.0583942	1.9	10	0.110949
MAT2B_IPI:IPI00002324.6	MAT2B	MAT2B	1	1	15 / 411	0.0364964	1.5	3	0.0547445
ARHGEF6_IPI:IPI00014256.2	ARHGEF6	ARHGEF6	1	1	2 / 411	0.00486618	1	1	0.00486618
EXOC6_IPI:IPI00010953.4	EXOC6	EXOC6	1	1	1 / 411	0.00243309	1	1	0.00243309
HSD17B10_IPI:IPI00017726.1	HSD17B10	HSD17B10	1	1	107 / 411	0.260341	5.7	32	1.48394
MRPS35_IPI:IPI00073779.1	MRPS35	MRPS35	1	1	25 / 411	0.0608273	1.4	3	0.0851582
NONO_IPI:IPI00304596.3	NONO	NONO	1	1	220 / 411	0.53528	18.8	386	10.0633
LMBRD2_IPI:IPI00017940.3	LMBRD2	LMBRD2	1	1	0 / 411	0	0	0	0
SGPL1_IPI:IPI00099463.2	SGPL1	SGPL1	1	1	10 / 411	0.0243309	1.2	2	0.0291971
CCT6A_IPI:IPI00027626.3	CCT6A	CCT6A	1	1	177 / 411	0.430657	15	153	6.45985
GNG12_IPI:IPI00221232.9	GNG12	GNG12	1	1	25 / 411	0.0608273	2	6	0.121655
RACGAP1_IPI:IPI00152946.1	RACGAP1	RACGAP1	1	1	35 / 411	0.0851582	5.6	37	0.476886
COPZ1_IPI:IPI00032851.1	COPZ1	COPZ1	1	1	34 / 411	0.0827251	1.7	4	0.140633
CDC37_IPI:IPI00013122.1	CDC37	CDC37	1	1	80 / 411	0.194647	3.4	22	0.6618
EIF5A_IPI:IPI00376005.2	EIF5A	EIF5A	1	1	125 / 411	0.304136	3.3	16	1.00365
LRRC41_IPI:IPI00397575.3	LRRC41	LRRC41	1	1	4 / 411	0.00973236	1	1	0.00973236
CBX3_IPI:IPI00297579.4	CBX3	CBX3	1	1	85 / 411	0.206813	4.5	31	0.930657
ATP5O_IPI:IPI00007611.1	ATP5O	ATP5O	1	1	51 / 411	0.124088	2.8	9	0.347445
KIAA0090_IPI:IPI00642244.2	KIAA0090	Invalid identifier / gene not available	1	1		0			0
TSC2_IPI:IPI00028493.3	TSC2	TSC2	1	1	7 / 411	0.0170316	1.9	5	0.0323601
RABGAP1L_IPI:IPI00006648.4	RABGAP1L	RABGAP1L	1	1	2 / 411	0.00486618	1	1	0.00486618
PSMD2_IPI:IPI00012268.3	PSMD2	PSMD2	1	1	124 / 411	0.301703	7.3	55	2.20243
EFHA1_IPI:IPI00640276.1	EFHA1	Invalid identifier / gene not available	1	1		0			0
IPI:IPI00375226.4_IPI:IPI00375226.4	IPI:IPI00375226	Invalid identifier / gene not available	1	1		0			0
DDX20_IPI:IPI00005904.3	DDX20	DDX20	1	1	40 / 411	0.0973236	2.6	15	0.253041
SSR4_IPI:IPI00019385.3	SSR4	SSR4	1	1	80 / 411	0.194647	2.9	9	0.564477
ACADM_IPI:IPI00005040.1	ACADM	ACADM	1	1	22 / 411	0.053528	3	10	0.160584
UBAC2_IPI:IPI00007034.3	UBAC2	UBAC2	1	1	6 / 411	0.0145985	1	1	0.0145985
PPP2CA_IPI:IPI00008380.1	PPP2CA	PPP2CA	1	1	84 / 411	0.20438	2.2	9	0.449635
RPLP0_IPI:IPI00008530.1	RPLP0	RPLP0	1	1	206 / 411	0.501217	7.1	47	3.55864
PFN2_IPI:IPI00107555.4	PFN2	PFN2	1	1	43 / 411	0.104623	1.5	4	0.156934
C19orf25_IPI:IPI00298662.5	C19ORF25	C19orf25	1	1	1 / 411	0.00243309	1	1	0.00243309
EWSR1_IPI:IPI00009841.5	EWSR1	EWSR1	1	1	143 / 411	0.347932	20.6	339	7.1674
HNRNPD_IPI:IPI00028888.1	HNRNPD	HNRNPD	1	1	216 / 411	0.525547	4.2	28	2.2073
IPO11_IPI:IPI00301107.7	IPO11	IPO11	1	1	7 / 411	0.0170316	1.6	3	0.0272506
ANKRD28_IPI:IPI00477505.3	ANKRD28	ANKRD28	1	1	14 / 411	0.0340633	1.6	4	0.0545012
TRIM28_IPI:IPI00438229.2	TRIM28	TRIM28	1	1	177 / 411	0.430657	12.8	67	5.51241
ERP44_IPI:IPI00401264.5	ERP44	ERP44	1	1	11 / 411	0.026764	1.3	2	0.0347932
HNRNPAB_IPI:IPI00334587.1	HNRNPAB	HNRNPAB	1	1	206 / 411	0.501217	3.6	20	1.80438
U2AF1_IPI:IPI00005613.3	U2AF1	U2AF1	1	1	127 / 411	0.309002	3.4	14	1.05061
PEX14_IPI:IPI00025346.3	PEX14	PEX14	1	1	29 / 411	0.0705596	4.3	12	0.303406
ALDOC_IPI:IPI00418262.5	ALDOC	ALDOC	1	1	38 / 411	0.0924574	3.2	13	0.295864
TRAFD1_IPI:IPI00009146.4	TRAFD1	TRAFD1	1	1	10 / 411	0.0243309	1.2	3	0.0291971
HSP90B1_IPI:IPI00027230.3	HSP90B1	HSP90B1	1	1	186 / 411	0.452555	13.1	96	5.92847
SORT1_IPI:IPI00217882.3	SORT1	SORT1	1	1	2 / 411	0.00486618	1	1	0.00486618
ADRM1_IPI:IPI00033030.2	ADRM1	ADRM1	1	1	67 / 411	0.163017	2.2	8	0.358637
FLNA_IPI:IPI00302592.2	FLNA	FLNA	1	1	226 / 411	0.549878	103.2	1970	56.7474
STX8_IPI:IPI00009225.1	STX8	STX8	1	1	0 / 411	0	0	0	0
TUBB4_IPI:IPI00023598.2	TUBB4	Invalid identifier / gene not available	1	1		0			0
PCMT1_IPI:IPI00828189.1	PCMT1	PCMT1	1	1	119 / 411	0.289538	6.9	53	1.99781
TTK_IPI:IPI00151170.4	TTK	TTK	1	1	21 / 411	0.0510949	2.9	8	0.148175
ATP1B3_IPI:IPI00008167.1	ATP1B3	ATP1B3	1	1	18 / 411	0.0437956	1.4	4	0.0613139
STUB1_IPI:IPI00025156.4	STUB1	STUB1	1	1	62 / 411	0.150852	2.5	10	0.377129
ACSL3_IPI:IPI00031397.3	ACSL3	ACSL3	1	1	48 / 411	0.116788	1.7	16	0.19854
DNAJC1_IPI:IPI00074870.1	DNAJC1	DNAJC1	1	1	0 / 411	0	0	0	0
UBE3C_IPI:IPI00411748.3	UBE3C	UBE3C	1	1	6 / 411	0.0145985	1.8	4	0.0262774
LRBA_IPI:IPI00002255.4	LRBA	LRBA	1	1	20 / 411	0.0486618	5.4	21	0.262774
SNRPD3_IPI:IPI00017964.1	SNRPD3	SNRPD3	1	1	176 / 411	0.428224	6.9	152	2.95474
NUBP2_IPI:IPI00644674.1	NUBP2	NUBP2	1	1	9 / 411	0.0218978	1.3	3	0.0284672
SFRS7_IPI:IPI00003377.1	SFRS7	Invalid identifier / gene not available	1	1		0			0
CAND2_IPI:IPI00374208.3	CAND2	CAND2	1	1	12 / 411	0.0291971	1.3	2	0.0379562
ATP5L_IPI:IPI00027448.3	ATP5L	ATP5L	1	1	22 / 411	0.053528	1.9	8	0.101703
DARS_IPI:IPI00216951.2	DARS	DARS	1	1	121 / 411	0.294404	5	35	1.47202
ABCE1_IPI:IPI00303207.3	ABCE1	ABCE1	1	1	40 / 411	0.0973236	3	18	0.291971
PIK3R4_IPI:IPI00024006.3	PIK3R4	PIK3R4	1	1	2 / 411	0.00486618	2	3	0.00973236
RPS26P54_IPI:IPI00376121.3	RPS26P54	Invalid identifier / gene not available	1	1		0			0
STARD3_IPI:IPI00000865.2	STARD3	STARD3	1	1	0 / 411	0	0	0	0
SLC25A4_IPI:IPI00022891.3	SLC25A4	SLC25A4	1	1	195 / 411	0.474453	5.1	40	2.41971
PANK4_IPI:IPI00018946.4	PANK4	PANK4	1	1	4 / 411	0.00973236	1	1	0.00973236
GNA13_IPI:IPI00290928.2	GNA13	GNA13	1	1	22 / 411	0.053528	1.3	5	0.0695864
GNAL_IPI:IPI00006395.1	GNAL	GNAL	1	1	38 / 411	0.0924574	1.6	8	0.147932
SERPINB3_IPI:IPI00022204.2	SERPINB3	SERPINB3	1	1	36 / 411	0.0875912	5.1	43	0.446715
APOOL_IPI:IPI00394809.1	APOOL	APOOL	1	1	2 / 411	0.00486618	1	1	0.00486618
PFDN2_IPI:IPI00006052.3	PFDN2	PFDN2	1	1	57 / 411	0.138686	2.3	8	0.318978
SQSTM1_IPI:IPI00013676.1	SQSTM1	SQSTM1	1	1	47 / 411	0.114355	5.2	26	0.594647
GDA_IPI:IPI00644409.2	GDA	GDA	1	1	0 / 411	0	0	0	0
SLC6A8_IPI:IPI00007582.1	SLC6A8	SLC6A8	1	1	0 / 411	0	0	0	0
AKAP8_IPI:IPI00014474.1	AKAP8	AKAP8	1	1	31 / 411	0.0754258	1.5	4	0.113139
SERPINB4_IPI:IPI00010303.1	SERPINB4	SERPINB4	1	1	25 / 411	0.0608273	5.5	38	0.33455
RRM2_IPI:IPI00011118.2	RRM2	RRM2	1	1	31 / 411	0.0754258	1.8	5	0.135766
PGAM5_IPI:IPI00788907.2	PGAM5	PGAM5	1	1	73 / 411	0.177616	5.2	29	0.923601
TOMM20_IPI:IPI00016676.1	TOMM20	TOMM20	1	1	5 / 411	0.0121655	1.2	2	0.0145985
TAP2_IPI:IPI00001382.2	TAP2	TAP2	1	1	1 / 411	0.00243309	1	1	0.00243309
BYSL_IPI:IPI00328987.3	BYSL	BYSL	1	1	56 / 411	0.136253	1.6	5	0.218005
XRN2_IPI:IPI00100151.4	XRN2	XRN2	1	1	97 / 411	0.23601	3.5	20	0.826034
LOC100129759_IPI:IPI00020827.1	LOC100129759	Invalid identifier / gene not available	1	1		0			0
APH1A_IPI:IPI00059964.3	APH1A	APH1A	1	1	0 / 411	0	0	0	0
TMEM126B_IPI:IPI00020540.4	TMEM126B	TMEM126B	1	1	1 / 411	0.00243309	1	1	0.00243309
KNTC1_IPI:IPI00001458.1	KNTC1	KNTC1	1	1	5 / 411	0.0121655	1.6	3	0.0194647
CYP51A1_IPI:IPI00295772.5	CYP51A1	CYP51A1	1	1	8 / 411	0.0194647	1.1	2	0.0214112
PDHB_IPI:IPI00003925.6	PDHB	PDHB	1	1	52 / 411	0.126521	5.9	26	0.746472
CLGN_IPI:IPI00024776.1	CLGN	CLGN	1	1	0 / 411	0	0	0	0
DNAJC9_IPI:IPI00154975.3	DNAJC9	DNAJC9	1	1	25 / 411	0.0608273	1.7	8	0.103406
IPI:IPI00911039.1_IPI:IPI00911039.1	IPI:IPI00911039	Invalid identifier / gene not available	1	1		0			0
YTHDF2_IPI:IPI00306043.1	YTHDF2	YTHDF2	1	1	66 / 411	0.160584	2.3	10	0.369343
DNAJB11_IPI:IPI00008454.1	DNAJB11	DNAJB11	1	1	52 / 411	0.126521	2	10	0.253041
ARFIP1_IPI:IPI00216520.1	ARFIP1	ARFIP1	1	1	2 / 411	0.00486618	2.5	4	0.0121655
RPL7A_IPI:IPI00299573.1	RPL7A	RPL7A	1	1	197 / 411	0.479319	6.8	48	3.25937
UTRN_IPI:IPI00009329.2	UTRN	UTRN	1	1	27 / 411	0.0656934	6.4	28	0.420438
MPI_IPI:IPI00219358.7	MPI	MPI	1	1	3 / 411	0.00729927	1.7	2	0.0124088
PAK1_IPI:IPI00289746.2	PAK1	PAK1	1	1	9 / 411	0.0218978	1.3	2	0.0284672
SNW1_IPI:IPI00013830.1	SNW1	SNW1	1	1	69 / 411	0.167883	8.1	37	1.35985
TTC27_IPI:IPI00183938.6	TTC27	TTC27	1	1	2 / 411	0.00486618	1	1	0.00486618
FAF2_IPI:IPI00172656.6	FAF2	FAF2	1	1	25 / 411	0.0608273	1.5	3	0.0912409
AGPS_IPI:IPI00010349.1	AGPS	AGPS	1	1	11 / 411	0.026764	2.3	9	0.0615572
PPP2R2C_IPI:IPI00032462.3	PPP2R2C	PPP2R2C	1	1	36 / 411	0.0875912	1.1	2	0.0963504
RPL35_IPI:IPI00412607.6	RPL35	RPL35	1	1	156 / 411	0.379562	3.2	56	1.2146
ARCN1_IPI:IPI00298520.4	ARCN1	ARCN1	1	1	92 / 411	0.223844	3.5	18	0.783455
CEPT1_IPI:IPI00005775.3	CEPT1	CEPT1	1	1	6 / 411	0.0145985	1.2	2	0.0175182
IPI:IPI00550731.2_IPI:IPI00550731.2	IPI:IPI00550731	Invalid identifier / gene not available	1	1		0			0
DDX39_IPI:IPI00644431.2	DDX39	DDX39A	1	1	138 / 411	0.335766	5.2	32	1.74599
EPDR1_IPI:IPI00259102.2	EPDR1	EPDR1	1	1	0 / 411	0	0	0	0
PRPF40A_IPI:IPI00337385.3	PRPF40A	PRPF40A	1	1	76 / 411	0.184915	5.9	30	1.091
ACBD3_IPI:IPI00009315.6	ACBD3	ACBD3	1	1	22 / 411	0.053528	1.5	4	0.080292
POLDIP3_IPI:IPI00429180.1	POLDIP3	POLDIP3	1	1	79 / 411	0.192214	6.2	27	1.19173
TUBA4B_IPI:IPI00017454.4	TUBA4B	Invalid identifier / gene not available	1	1		0			0
NUP210_IPI:IPI00291755.6	NUP210	NUP210	1	1	25 / 411	0.0608273	5.9	24	0.358881
TTC4_IPI:IPI00000606.5	TTC4	TTC4	1	1	1 / 411	0.00243309	1	1	0.00243309
RPS13_IPI:IPI00221089.5	RPS13	RPS13	1	1	158 / 411	0.384428	4.5	17	1.72993
IGF2BP1_IPI:IPI00008557.5	IGF2BP1	IGF2BP1	1	1	114 / 411	0.277372	6.5	50	1.80292
TBRG4_IPI:IPI00329625.5	TBRG4	TBRG4	1	1	9 / 411	0.0218978	5.6	12	0.122628
SOX6_IPI:IPI00218631.2	SOX6	SOX6	1	1	1 / 411	0.00243309	1	1	0.00243309
PI4KA_IPI:IPI00031424.1	PI4KA	PI4KA	1	1	14 / 411	0.0340633	2.6	12	0.0885645
ARFGAP1_IPI:IPI00175169.3	ARFGAP1	ARFGAP1	1	1	24 / 411	0.0583942	6.4	23	0.373723
MYH9_IPI:IPI00019502.3	MYH9	MYH9	1	1	203 / 411	0.493917	32.8	670	16.2005
CDC5L_IPI:IPI00465294.2	CDC5L	CDC5L	1	1	79 / 411	0.192214	13	48	2.49878
HLA-B_IPI:IPI00472943.1	HLA-B	HLA-B	1	1	19 / 411	0.0462287	1.4	3	0.0647202
ALDOA_IPI:IPI00465439.5	ALDOA	ALDOA	1	1	172 / 411	0.418491	8.5	72	3.55718
TBC1D15_IPI:IPI00794613.4	TBC1D15	TBC1D15	1	1	23 / 411	0.0559611	4.5	11	0.251825
DGAT1_IPI:IPI00015799.2	DGAT1	DGAT1	1	1	0 / 411	0	0	0	0
KIAA1618_IPI:IPI00218094.3	KIAA1618	Invalid identifier / gene not available	1	1		0			0
MPP2_IPI:IPI00218271.5	MPP2	MPP2	1	1	0 / 411	0	0	0	0
SLC38A10_IPI:IPI00443799.2	SLC38A10	SLC38A10	1	1	4 / 411	0.00973236	1	1	0.00973236
RPS20_IPI:IPI00012493.1	RPS20	RPS20	1	1	179 / 411	0.435523	3.6	23	1.56788
RNF160_IPI:IPI00783835.2	RNF160	Invalid identifier / gene not available	1	1		0			0
TOR1AIP1_IPI:IPI00792065.3	TOR1AIP1	TOR1AIP1	1	1	21 / 411	0.0510949	1.6	3	0.0817518
DNAJB12_IPI:IPI00014400.5	DNAJB12	DNAJB12	1	1	7 / 411	0.0170316	1.4	4	0.0238443
PLD6_IPI:IPI00251454.5	PLD6	PLD6	1	1	0 / 411	0	0	0	0
DYNLL1_IPI:IPI00019329.1	DYNLL1	DYNLL1	1	1	64 / 411	0.155718	2.2	8	0.342579
SCML2_IPI:IPI00328688.3	SCML2	SCML2	1	1	24 / 411	0.0583942	12.2	31	0.712409
FAM115A_IPI:IPI00006050.4	FAM115A	FAM115A	1	1	3 / 411	0.00729927	1.3	2	0.00948905
NUDC_IPI:IPI00550746.4	NUDC	NUDC	1	1	99 / 411	0.240876	5.1	33	1.22847
ACTR1A_IPI:IPI00029468.1	ACTR1A	ACTR1A	1	1	95 / 411	0.231144	4.2	19	0.970803
KIAA1244_IPI:IPI00514897.3	KIAA1244	KIAA1244	1	1	4 / 411	0.00973236	1	1	0.00973236
RPL26L1_IPI:IPI00007144.1	RPL26L1	RPL26L1	1	1	138 / 411	0.335766	4.3	19	1.4438
SCAMP4_IPI:IPI00056310.3	SCAMP4	SCAMP4	1	1	2 / 411	0.00486618	1	1	0.00486618
SPTLC1_IPI:IPI00005745.1	SPTLC1	SPTLC1	1	1	12 / 411	0.0291971	1.4	3	0.0408759
MATR3_IPI:IPI00017297.1	MATR3	MATR3	1	1	171 / 411	0.416058	11.1	96	4.61825
GRAMD1A_IPI:IPI00168347.7	GRAMD1A	GRAMD1A	1	1	9 / 411	0.0218978	2.1	4	0.0459854
IPI:IPI00640597.1_IPI:IPI00640597.1	IPI:IPI00640597	Invalid identifier / gene not available	1	1		0			0
GPD2_IPI:IPI00017895.3	GPD2	GPD2	1	1	3 / 411	0.00729927	2	4	0.0145985
PPP2R1B_IPI:IPI00294178.2	PPP2R1B	PPP2R1B	1	1	77 / 411	0.187348	2	10	0.374696
NUP188_IPI:IPI00385001.4	NUP188	NUP188	1	1	21 / 411	0.0510949	2.4	9	0.122628
NDUFS1_IPI:IPI00604664.5	NDUFS1	NDUFS1	1	1	19 / 411	0.0462287	4.4	33	0.203406
TMEM115_IPI:IPI00170517.1	TMEM115	TMEM115	1	1	3 / 411	0.00729927	1	1	0.00729927
PFKM_IPI:IPI00219585.4	PFKM	PFKM	1	1	30 / 411	0.0729927	2.3	10	0.167883
RPS27L_IPI:IPI00420117.6	RPS27L	RPS27L	1	1	166 / 411	0.403893	2.4	18	0.969343
DHCR24_IPI:IPI00016703.2	DHCR24	DHCR24	1	1	3 / 411	0.00729927	1.3	2	0.00948905
RNASEN_IPI:IPI00219990.1	RNASEN	Invalid identifier / gene not available	1	1		0			0
PSMC6_IPI:IPI00021926.4	PSMC6	PSMC6	1	1	89 / 411	0.216545	3.8	32	0.822871
MON2_IPI:IPI00183974.2	MON2	MON2	1	1	11 / 411	0.026764	1.8	7	0.0481752
DNAJC9_IPI:IPI00014718.4	DNAJC9	DNAJC9	1	1	25 / 411	0.0608273	1.7	8	0.103406
RPL35A_IPI:IPI00029731.8	RPL35A	RPL35A	1	1	108 / 411	0.262774	3.8	23	0.99854
PSMD14_IPI:IPI00024821.1	PSMD14	PSMD14	1	1	83 / 411	0.201946	2.4	10	0.484672
KHDRBS1_IPI:IPI00008575.3	KHDRBS1	KHDRBS1	1	1	138 / 411	0.335766	3.5	53	1.17518
PPM1G_IPI:IPI00006167.1	PPM1G	PPM1G	1	1	42 / 411	0.10219	2	9	0.20438
FAR1_IPI:IPI00478838.3	FAR1	FAR1	1	1	14 / 411	0.0340633	1.4	4	0.0476886
CNNM3_IPI:IPI00168565.2	CNNM3	CNNM3	1	1	0 / 411	0	0	0	0
AURKB_IPI:IPI00176642.3	AURKB	AURKB	1	1	29 / 411	0.0705596	4.3	18	0.303406
PM20D2_IPI:IPI00217852.6	PM20D2	PM20D2	1	1	7 / 411	0.0170316	1	1	0.0170316
IPO8_IPI:IPI00007401.2	IPO8	IPO8	1	1	55 / 411	0.13382	21.7	343	2.90389
PEX3_IPI:IPI00010232.1	PEX3	PEX3	1	1	0 / 411	0	0	0	0
LETM1_IPI:IPI00017592.1	LETM1	LETM1	1	1	18 / 411	0.0437956	1.6	9	0.070073
EFNB2_IPI:IPI00005126.1	EFNB2	EFNB2	1	1	1 / 411	0.00243309	16	16	0.0389294
MT-CO2_IPI:IPI00017510.3	MT-CO2	MT-CO2	1	1	20 / 411	0.0486618	2.7	14	0.131387
SDHA_IPI:IPI00305166.2	SDHA	SDHA	1	1	44 / 411	0.107056	4.3	22	0.460341
ALDH7A1_IPI:IPI00221234.7	ALDH7A1	ALDH7A1	1	1	37 / 411	0.0900243	3.2	17	0.288078
HSPD1_IPI:IPI00076042.2	HSPD1	HSPD1	1	1	231 / 411	0.562044	17.9	165	10.0606
NDUFB9_IPI:IPI00255052.5	NDUFB9	NDUFB9	1	1	2 / 411	0.00486618	1	1	0.00486618
IPI:IPI00152990.7_IPI:IPI00152990.7	IPI:IPI00152990	Invalid identifier / gene not available	1	1		0			0
LOC100190938_IPI:IPI00166671.2	LOC100190938	Invalid identifier / gene not available	1	1		0			0
NDUFA11_IPI:IPI00329301.3	NDUFA11	NDUFA11	1	1	1 / 411	0.00243309	1	1	0.00243309
PTPN1_IPI:IPI00297261.3	PTPN1	PTPN1	1	1	21 / 411	0.0510949	1.9	4	0.0970803
DDOST_IPI:IPI00297084.7	DDOST	DDOST	1	1	59 / 411	0.143552	3.6	17	0.516788
CCDC132_IPI:IPI00418185.3	CCDC132	CCDC132	1	1	2 / 411	0.00486618	1	1	0.00486618
MTP18_IPI:IPI00456009.1	MTP18	Invalid identifier / gene not available	1	1		0			0
FAU_IPI:IPI00019770.3	FAU	FAU	1	1	143 / 411	0.347932	2.3	11	0.800243
RAB39_IPI:IPI00001618.2	RAB39	Invalid identifier / gene not available	1	1		0			0
IPO13_IPI:IPI00005651.3	IPO13	IPO13	1	1	0 / 411	0	0	0	0
RPS11_IPI:IPI00025091.3	RPS11	RPS11	1	1	151 / 411	0.367397	4.3	22	1.57981
CAMK2G_IPI:IPI00172450.2	CAMK2G	CAMK2G	1	1	8 / 411	0.0194647	2.5	5	0.0486618
EXOC6B_IPI:IPI00852806.1	EXOC6B	EXOC6B	1	1	2 / 411	0.00486618	1	1	0.00486618
DCTN2_IPI:IPI00220503.9	DCTN2	DCTN2	1	1	91 / 411	0.221411	5.4	25	1.19562
USP30_IPI:IPI00455146.3	USP30	USP30	1	1	0 / 411	0	0	0	0
HEATR6_IPI:IPI00464999.2	HEATR6	HEATR6	1	1	2 / 411	0.00486618	1	1	0.00486618
RPS27_IPI:IPI00513971.5	RPS27	RPS27	1	1	185 / 411	0.450122	3	28	1.35036
C8orf55_IPI:IPI00171421.3	C8ORF55	Invalid identifier / gene not available	1	1		0			0
HSPH1_IPI:IPI00218993.1	HSPH1	HSPH1	1	1	119 / 411	0.289538	6	25	1.73723
UBR4_IPI:IPI00514902.1	UBR4	UBR4	1	1	36 / 411	0.0875912	15.2	76	1.33139
CBARA1_IPI:IPI00295598.4	CBARA1	Invalid identifier / gene not available	1	1		0			0
VPS18_IPI:IPI00001985.2	VPS18	VPS18	1	1	1 / 411	0.00243309	1	1	0.00243309
STAT3_IPI:IPI00306436.1	STAT3	STAT3	1	1	36 / 411	0.0875912	6	25	0.525547
RPL13A_IPI:IPI00304612.9	RPL13A	RPL13A	1	1	144 / 411	0.350365	5.1	65	1.78686
KLC2_IPI:IPI00021634.3	KLC2	KLC2	1	1	53 / 411	0.128954	3.1	10	0.399757
RINT1_IPI:IPI00072224.7	RINT1	RINT1	1	1	3 / 411	0.00729927	1.7	2	0.0124088
SQRDL_IPI:IPI00009634.1	SQRDL	SQRDL	1	1	2 / 411	0.00486618	5	6	0.0243309
TM9SF2_IPI:IPI00018415.1	TM9SF2	TM9SF2	1	1	1 / 411	0.00243309	1	1	0.00243309
SAP30BP_IPI:IPI00333699.5	SAP30BP	SAP30BP	1	1	39 / 411	0.0948905	2.5	10	0.237226
MAP7D2_IPI:IPI00554579.3	MAP7D2	MAP7D2	1	1	7 / 411	0.0170316	1.3	2	0.0221411
PEX19_IPI:IPI00441867.1	PEX19	PEX19	1	1	1 / 411	0.00243309	1	1	0.00243309
SAPS2_IPI:IPI00375638.7	SAPS2	Invalid identifier / gene not available	1	1		0			0
CD97_IPI:IPI00299412.7	CD97	CD97	1	1	6 / 411	0.0145985	1.3	2	0.0189781
MFN2_IPI:IPI00642329.2	MFN2	MFN2	1	1	1 / 411	0.00243309	1	1	0.00243309
GNAO1_IPI:IPI00220281.3	GNAO1	GNAO1	1	1	42 / 411	0.10219	1.6	13	0.163504
TAP1_IPI:IPI00646625.1	TAP1	TAP1	1	1	2 / 411	0.00486618	1	1	0.00486618
ABCB6_IPI:IPI00065486.3	ABCB6	ABCB6	1	1	5 / 411	0.0121655	1	1	0.0121655
LMF2_IPI:IPI00385495.5	LMF2	LMF2	1	1	2 / 411	0.00486618	1	1	0.00486618
SR140_IPI:IPI00143753.6	SR140	Invalid identifier / gene not available	1	1		0			0
ERMP1_IPI:IPI00257903.4	ERMP1	ERMP1	1	1	1 / 411	0.00243309	1	1	0.00243309
SRM_IPI:IPI00292020.3	SRM	SRM	1	1	17 / 411	0.0413625	2.1	6	0.0868613
ATP5I_IPI:IPI00218848.5	ATP5I	ATP5I	1	1	6 / 411	0.0145985	1.2	2	0.0175182
MON2_IPI:IPI00465246.4	MON2	MON2	1	1	11 / 411	0.026764	1.8	7	0.0481752
RBM22_IPI:IPI00019046.4	RBM22	RBM22	1	1	25 / 411	0.0608273	4.8	16	0.291971
WDR68_IPI:IPI00006754.1	WDR68	Invalid identifier / gene not available	1	1		0			0
NOL9_IPI:IPI00002902.5	NOL9	NOL9	1	1	34 / 411	0.0827251	2.7	9	0.223358
BCAP31_IPI:IPI00218200.8	BCAP31	BCAP31	1	1	36 / 411	0.0875912	1.5	6	0.131387
TMEM57_IPI:IPI00296938.1	TMEM57	TMEM57	1	1	0 / 411	0	0	0	0
HLA-G_IPI:IPI00015988.9	HLA-G	HLA-G	1	1	5 / 411	0.0121655	1	1	0.0121655
RSAD1_IPI:IPI00550335.4	RSAD1	RSAD1	1	1	2 / 411	0.00486618	1	1	0.00486618
RCCD1_IPI:IPI00399158.4	RCCD1	RCCD1	1	1	0 / 411	0	0	0	0
NDUFB1_IPI:IPI00025725.2	NDUFB1	NDUFB1	1	1	0 / 411	0	0	0	0
DEGS1_IPI:IPI00021147.1	DEGS1	DEGS1	1	1	1 / 411	0.00243309	1	1	0.00243309
PRPF4B_IPI:IPI00013721.2	PRPF4B	PRPF4B	1	1	36 / 411	0.0875912	16.1	62	1.41022
PSMD9_IPI:IPI00010860.1	PSMD9	PSMD9	1	1	0 / 411	0	0	0	0
SF3B3_IPI:IPI00300371.5	SF3B3	SF3B3	1	1	173 / 411	0.420925	12.9	224	5.42993
PON2_IPI:IPI00014958.1	PON2	PON2	1	1	4 / 411	0.00973236	1.5	2	0.0145985
STEAP2_IPI:IPI00168894.2	STEAP2	STEAP2	1	1	0 / 411	0	0	0	0
EIF4G1_IPI:IPI00220365.6	EIF4G1	EIF4G1	1	1	102 / 411	0.248175	13.3	78	3.30073
IPO9_IPI:IPI00185146.5	IPO9	IPO9	1	1	26 / 411	0.0632603	1.8	8	0.113869
TMEM97_IPI:IPI00020004.3	TMEM97	TMEM97	1	1	4 / 411	0.00973236	1	1	0.00973236
FAM82A2_IPI:IPI00410079.3	FAM82A2	Invalid identifier / gene not available	1	1	0	0	0	0	0

## Sheet: SIVcpz Nef
SIVcpz Nef
IPI	User Input	Mapped Gene Symbol	Unique peptide	Total peptide	ExpAP	ExpAP Calculated	Ave SC	Max SC	ExpAP x Ave SC
ACACA_IPI:IPI00011569.2	ACACA	ACACA	66	105	86 / 411	0.209246	139.1	840	29.1061
PRKDC_IPI:IPI00296337.2	PRKDC	PRKDC	55	69	175 / 411	0.425791	22	175	9.3674
EXOC4_IPI:IPI00059279.5	EXOC4	EXOC4	29	51	43 / 411	0.104623	1.6	5	0.167397
EXOC3_IPI:IPI00157734.2	EXOC3	EXOC3	28	49	5 / 411	0.0121655	1.4	2	0.0170316
HSPA8_IPI:IPI00003865.1	HSPA8	HSPA8	26	49	396 / 411	0.963504	39.2	332	37.7693
EXOC2_IPI:IPI00783559.1	EXOC2	EXOC2	24	53	4 / 411	0.00973236	1	1	0.00973236
EXOC1_IPI:IPI00019427.4	EXOC1	EXOC1	23	39	5 / 411	0.0121655	1	1	0.0121655
PC_IPI:IPI00299402.1	PC	PC	22	32	106 / 411	0.257908	180.2	1354	46.4749
ARHGEF7_IPI:IPI00449906.4	ARHGEF7	ARHGEF7	19	37	10 / 411	0.0243309	1.2	2	0.0291971
ATXN2L_IPI:IPI00456359.1	ATXN2L	ATXN2L	19	31	127 / 411	0.309002	17.4	113	5.37664
EXOC7_IPI:IPI00103064.4	EXOC7	EXOC7	17	21	6 / 411	0.0145985	1.2	2	0.0175182
ARHGEF6_IPI:IPI00014256.2	ARHGEF6	ARHGEF6	16	27	2 / 411	0.00486618	1	1	0.00486618
IRS4_IPI:IPI00020729.1	IRS4	IRS4	16	22	152 / 411	0.36983	11	105	4.06813
PAK2_IPI:IPI00419979.3	PAK2	PAK2	15	29	14 / 411	0.0340633	2.7	11	0.0919708
HSPA5_IPI:IPI00003362.2	HSPA5	HSPA5	14	19	360 / 411	0.875912	16.9	112	14.8029
GIT1_IPI:IPI00384861.3	GIT1	GIT1	13	23	9 / 411	0.0218978	1	1	0.0218978
HSPA1A_IPI:IPI00304925.5	HSPA1A	HSPA1B	12	40	395 / 411	0.961071	42.9	331	41.2299
DBT_IPI:IPI00003944.1	DBT	DBT	12	14	89 / 411	0.216545	30.9	169	6.69124
TUBB2C_IPI:IPI00007752.1	TUBB2C	TUBB4B	11	23	376 / 411	0.914842	29.9	310	27.3538
RPS3_IPI:IPI00011253.3	RPS3	RPS3	11	17	266 / 411	0.647202	12	56	7.76642
IPI:IPI00719051.3_IPI:IPI00719051.3	IPI:IPI00719051	Invalid identifier / gene not available	11	14		0			0
NUFIP2_IPI:IPI00002349.2	NUFIP2	NUFIP2	10	11	94 / 411	0.22871	10	50	2.2871
DDX6_IPI:IPI00030320.4	DDX6	DDX6	10	13	129 / 411	0.313869	6.3	54	1.97737
SCRIB_IPI:IPI00410666.1	SCRIB	SCRIB	10	11	35 / 411	0.0851582	8.5	32	0.723844
SLC25A13_IPI:IPI00007084.3	SLC25A13	SLC25A13	10	12	50 / 411	0.121655	3.4	19	0.413625
UBR4_IPI:IPI00640981.3	UBR4	UBR4	10	10	36 / 411	0.0875912	15.2	76	1.33139
HNRNPU_IPI:IPI00479217.1	HNRNPU	HNRNPU	9	13	280 / 411	0.681265	15.8	256	10.764
HNRNPK_IPI:IPI00216049.1	HNRNPK	HNRNPK	9	12	288 / 411	0.70073	16.3	143	11.4219
HSPA9_IPI:IPI00007765.5	HSPA9	HSPA9	9	12	307 / 411	0.746959	19	160	14.1922
ATP5A1_IPI:IPI00440493.2	ATP5A1	ATP5A1	9	14	210 / 411	0.510949	11	83	5.62044
PKM2_IPI:IPI00220644.8	PKM2	PKM	9	12	249 / 411	0.605839	17.7	181	10.7234
HSPA1L_IPI:IPI00301277.1	HSPA1L	HSPA1L	8	28	389 / 411	0.946472	22.6	189	21.3903
TMPO_IPI:IPI00030131.3	TMPO	TMPO	8	9	127 / 411	0.309002	13.6	78	4.20243
UBR4_IPI:IPI00180305.7	UBR4	UBR4	8	9	36 / 411	0.0875912	15.2	76	1.33139
COPA_IPI:IPI00295857.7	COPA	COPA	8	9	86 / 411	0.209246	4.8	58	1.00438
ATP1A1_IPI:IPI00006482.1	ATP1A1	ATP1A4	8	11	45 / 411	0.109489	2.3	15	0.251825
NCL_IPI:IPI00444262.3	NCL	NCL	8	13	261 / 411	0.635036	16.6	99	10.5416
SLC25A5_IPI:IPI00007188.5	SLC25A5	SLC25A5	8	10	223 / 411	0.542579	7.1	58	3.85231
IMMT_IPI:IPI00009960.6	IMMT	IMMT	8	8	44 / 411	0.107056	5.4	72	0.578102
CAD_IPI:IPI00301263.2	CAD	CAD	8	9	147 / 411	0.357664	11.3	88	4.04161
TUBA4A_IPI:IPI00007750.1	TUBA4A	TUBA4A	8	17	377 / 411	0.917275	28.6	242	26.2341
CKAP4_IPI:IPI00141318.2	CKAP4	CKAP4	8	8	58 / 411	0.141119	5	24	0.705596
SERBP1_IPI:IPI00410693.3	SERBP1	SERBP1	7	9	175 / 411	0.425791	12	107	5.10949
HSPD1_IPI:IPI00784154.1	HSPD1	HSPD1	7	9	231 / 411	0.562044	17.9	165	10.0606
PFKP_IPI:IPI00009790.1	PFKP	PFKP	7	7	75 / 411	0.182482	4.2	26	0.766423
EXOC6_IPI:IPI00010953.4	EXOC6	EXOC6	7	11	1 / 411	0.00243309	1	1	0.00243309
PABPC1_IPI:IPI00008524.1	PABPC1	PABPC1	7	7	172 / 411	0.418491	8.3	104	3.47348
SMC2_IPI:IPI00007927.4	SMC2	SMC2	7	7	82 / 411	0.199513	5.9	33	1.17713
HNRNPM_IPI:IPI00171903.2	HNRNPM	HNRNPM	7	8	220 / 411	0.53528	15.9	149	8.51095
LRPPRC_IPI:IPI00783271.1	LRPPRC	LRPPRC	7	9	130 / 411	0.316302	15.5	112	4.90268
GCN1L1_IPI:IPI00001159.1	GCN1L1	GCN1L1	7	7	104 / 411	0.253041	11.4	105	2.88467
ILF2_IPI:IPI00005198.2	ILF2	ILF2	6	7	152 / 411	0.36983	5.5	53	2.03406
NCL_IPI:IPI00183526.6	NCL	NCL	6	13	261 / 411	0.635036	16.6	99	10.5416
GIT2_IPI:IPI00186690.6	GIT2	GIT2	6	12	3 / 411	0.00729927	1	1	0.00729927
MCM3_IPI:IPI00013214.2	MCM3	MCM3	6	6	120 / 411	0.291971	6.6	63	1.92701
TUFM_IPI:IPI00027107.5	TUFM	TUFM	6	6	139 / 411	0.3382	8.6	53	2.90852
RPS3A_IPI:IPI00419880.6	RPS3A	RPS3A	6	7	203 / 411	0.493917	9	51	4.44526
RPL6_IPI:IPI00329389.8	RPL6	RPL6	6	8	172 / 411	0.418491	11.5	249	4.81265
RPS18_IPI:IPI00013296.3	RPS18	RPS18	6	8	229 / 411	0.557178	5.8	40	3.23163
PHB_IPI:IPI00017334.1	PHB	PHB	6	6	85 / 411	0.206813	3.9	34	0.806569
DHX9_IPI:IPI00844578.1	DHX9	DHX9	6	7	205 / 411	0.498783	15.3	169	7.63139
YWHAE_IPI:IPI00000816.1	YWHAE	YWHAE	6	6	186 / 411	0.452555	9.4	90	4.25401
YBX1_IPI:IPI00031812.3	YBX1	YBX1	5	6	233 / 411	0.56691	7.2	101	4.08175
COPB1_IPI:IPI00295851.4	COPB1	COPB1	5	5	92 / 411	0.223844	3.1	18	0.693917
HSP90AA1_IPI:IPI00382470.3	HSP90AA1	HSP90AA1	5	7	272 / 411	0.6618	30	327	19.854
EXOC8_IPI:IPI00028264.3	EXOC8	EXOC8	5	5	2 / 411	0.00486618	1	1	0.00486618
ATP1A2_IPI:IPI00003021.1	ATP1A2	ATP1A2	5	7	94 / 411	0.22871	3.4	42	0.777616
TRIM28_IPI:IPI00438229.2	TRIM28	TRIM28	5	5	177 / 411	0.430657	12.8	67	5.51241
RPS4X_IPI:IPI00217030.1	RPS4X	RPS4X	5	7	225 / 411	0.547445	9.7	58	5.31022
RPS14_IPI:IPI00026271.5	RPS14	RPS14	5	8	259 / 411	0.63017	4.6	33	2.89878
GIT2_IPI:IPI00216991.1	GIT2	GIT2	5	7	3 / 411	0.00729927	1	1	0.00729927
SNAP23_IPI:IPI00010438.2	SNAP23	SNAP23	5	6	41 / 411	0.0997567	3.5	15	0.349148
G3BP1_IPI:IPI00012442.1	G3BP1	G3BP1	5	7	141 / 411	0.343066	6.8	84	2.33285
SYNCRIP_IPI:IPI00018140.3	SYNCRIP	SYNCRIP	5	6	197 / 411	0.479319	6.9	97	3.3073
C22orf28_IPI:IPI00550689.3	C22ORF28	Invalid identifier / gene not available	5	6		0			0
SLC25A11_IPI:IPI00219729.3	SLC25A11	SLC25A11	5	7	55 / 411	0.13382	3.1	18	0.414842
MARCKS_IPI:IPI00219301.7	MARCKS	MARCKS	5	5	95 / 411	0.231144	2.8	14	0.647202
ATP2A2_IPI:IPI00177817.4	ATP2A2	ATP2A2	5	6	92 / 411	0.223844	4.3	35	0.96253
GTF2I_IPI:IPI00054042.1	GTF2I	GTF2I	5	6	141 / 411	0.343066	14	71	4.80292
EXOC6B_IPI:IPI00852806.1	EXOC6B	EXOC6B	5	7	2 / 411	0.00486618	1	1	0.00486618
PAK3_IPI:IPI00027382.1	PAK3	PAK3	5	5	7 / 411	0.0170316	1.1	2	0.0187348
DDX5_IPI:IPI00017617.1	DDX5	DDX5	5	7	247 / 411	0.600973	8.7	86	5.22847
EIF2S2_IPI:IPI00021728.3	EIF2S2	EIF2S2	5	5	71 / 411	0.172749	1.9	7	0.328224
PRDX1_IPI:IPI00000874.1	PRDX1	PRDX1	5	5	253 / 411	0.615572	7.9	45	4.86302
NPM1_IPI:IPI00220740.1	NPM1	NPM1	5	7	252 / 411	0.613139	16.4	172	10.0555
RPS2_IPI:IPI00013485.3	RPS2	RPS2	5	5	210 / 411	0.510949	7.3	52	3.72993
TCP1_IPI:IPI00290566.1	TCP1	TCP1	5	5	184 / 411	0.447689	18.8	148	8.41655
ATAD3B_IPI:IPI00045921.1	ATAD3B	ATAD3B	5	5	59 / 411	0.143552	4.8	42	0.689051
ATP5B_IPI:IPI00303476.1	ATP5B	ATP5B	5	5	211 / 411	0.513382	10	106	5.13382
KIF5B_IPI:IPI00012837.1	KIF5B	KIF5B	5	5	97 / 411	0.23601	8.3	48	1.95888
HIST1H1C_IPI:IPI00217465.5	HIST1H1C	HIST1H1C	5	5	301 / 411	0.73236	10.4	76	7.61655
ARCN1_IPI:IPI00298520.4	ARCN1	ARCN1	5	5	92 / 411	0.223844	3.5	18	0.783455
RPS16_IPI:IPI00221092.8	RPS16	RPS16	5	6	211 / 411	0.513382	5.9	42	3.02895
EXOC6_IPI:IPI00163337.7	EXOC6	EXOC6	5	5	1 / 411	0.00243309	1	1	0.00243309
RPS9_IPI:IPI00221088.5	RPS9	RPS9	5	5	170 / 411	0.413625	6	35	2.48175
CSDA_IPI:IPI00031801.4	CSDA	Invalid identifier / gene not available	4	6		0			0
TIMM50_IPI:IPI00418497.1	TIMM50	TIMM50	4	5	124 / 411	0.301703	4.1	45	1.23698
SERPINA1_IPI:IPI00305457.5	SERPINA1	SERPINA1	4	4	2 / 411	0.00486618	2	3	0.00973236
DNAJB1_IPI:IPI00015947.5	DNAJB1	DNAJB1	4	5	39 / 411	0.0948905	1.7	5	0.161314
FKBP8_IPI:IPI00328161.8	FKBP8	FKBP8	4	4	21 / 411	0.0510949	1.6	4	0.0817518
TUBA1C_IPI:IPI00166768.3	TUBA1C	TUBA1C	4	14	389 / 411	0.946472	37	281	35.0195
IQGAP2_IPI:IPI00299048.6	IQGAP2	IQGAP2	4	4	23 / 411	0.0559611	2	9	0.111922
XRCC6_IPI:IPI00644712.4	XRCC6	XRCC6	4	4	176 / 411	0.428224	9	71	3.85401
MCCC2_IPI:IPI00784044.1	MCCC2	MCCC2	4	5	93 / 411	0.226277	41.7	391	9.43577
MCCC1_IPI:IPI00024580.4	MCCC1	MCCC1	4	4	88 / 411	0.214112	44.2	272	9.46375
USP9X_IPI:IPI00003964.4	USP9X	USP9X	4	4	66 / 411	0.160584	3.3	21	0.529927
RPL4_IPI:IPI00003918.6	RPL4	RPL4	4	4	197 / 411	0.479319	9.6	81	4.60146
HSP90AB1_IPI:IPI00414676.6	HSP90AB1	HSP90AB1	4	4	277 / 411	0.673966	30.7	278	20.6908
SRPRB_IPI:IPI00295098.3	SRPRB	SRPRB	4	4	35 / 411	0.0851582	1.7	5	0.144769
KIAA1967_IPI:IPI00182757.1	KIAA1967	CCAR2	4	4	118 / 411	0.287105	6.8	72	1.95231
POLDIP3_IPI:IPI00440688.4	POLDIP3	POLDIP3	4	4	79 / 411	0.192214	6.2	27	1.19173
DDX21_IPI:IPI00015953.3	DDX21	DDX21	4	4	179 / 411	0.435523	13.1	75	5.70535
HNRNPF_IPI:IPI00003881.5	HNRNPF	HNRNPF	4	6	243 / 411	0.591241	8.1	58	4.78905
IQGAP1_IPI:IPI00009342.1	IQGAP1	IQGAP1	4	4	95 / 411	0.231144	5.8	55	1.34063
ATP2A1_IPI:IPI00024804.3	ATP2A1	ATP2A1	4	5	59 / 411	0.143552	2.4	16	0.344526
OAT_IPI:IPI00022334.1	OAT	OAT	4	5	95 / 411	0.231144	4.4	44	1.01703
RPS19_IPI:IPI00215780.5	RPS19	RPS19	4	4	181 / 411	0.440389	6.6	58	2.90657
GLUD1_IPI:IPI00016801.1	GLUD1	GLUD1	4	4	90 / 411	0.218978	4.2	27	0.919708
PTPLAD1_IPI:IPI00008998.3	PTPLAD1	PTPLAD1	4	6	55 / 411	0.13382	2.5	17	0.33455
CCT2_IPI:IPI00297779.7	CCT2	CCT2	4	4	180 / 411	0.437956	22.3	242	9.76642
RPS25_IPI:IPI00012750.3	RPS25	RPS25	4	4	196 / 411	0.476886	4.4	20	2.0983
EIF3D_IPI:IPI00006181.1	EIF3D	EIF3D	4	4	81 / 411	0.19708	3	22	0.591241
CAND1_IPI:IPI00100160.3	CAND1	CAND1	4	4	88 / 411	0.214112	6.5	61	1.39173
EMD_IPI:IPI00032003.1	EMD	EMD	4	4	82 / 411	0.199513	3.7	26	0.7382
ACTB_IPI:IPI00021439.1	ACTB	ACTB	4	6	363 / 411	0.883212	36.4	716	32.1489
HSPA7_IPI:IPI00011134.2	HSPA7	Invalid identifier / gene not available	4	9		0			0
SLC25A3_IPI:IPI00022202.3	SLC25A3	SLC25A3	4	5	130 / 411	0.316302	4.3	49	1.3601
HNRNPR_IPI:IPI00012074.3	HNRNPR	HNRNPR	4	4	188 / 411	0.457421	7.7	173	3.52214
DDX3X_IPI:IPI00215637.5	DDX3X	DDX3X	4	4	212 / 411	0.515815	10.5	87	5.41606
SLC25A1_IPI:IPI00294159.3	SLC25A1	SLC25A1	4	7	42 / 411	0.10219	3.4	14	0.347445
VDAC2_IPI:IPI00024145.2	VDAC2	VDAC2	4	5	58 / 411	0.141119	8.1	51	1.14307
COPG2_IPI:IPI00002557.1	COPG2	COPG2	4	5	67 / 411	0.163017	15.4	92	2.51046
RPL26L1_IPI:IPI00007144.1	RPL26L1	RPL26L1	4	4	138 / 411	0.335766	4.3	19	1.4438
PABPC4_IPI:IPI00012726.4	PABPC4	PABPC4	4	4	142 / 411	0.345499	6.7	72	2.31484
CLPTM1_IPI:IPI00107357.7	CLPTM1	CLPTM1	3	3	2 / 411	0.00486618	1	1	0.00486618
YWHAQ_IPI:IPI00018146.1	YWHAQ	YWHAQ	3	3	153 / 411	0.372263	4.3	91	1.60073
RPS17_IPI:IPI00221093.7	RPS17	RPS17L	3	6	177 / 411	0.430657	4.7	42	2.02409
NACA_IPI:IPI00023748.3	NACA	NACA	3	3	125 / 411	0.304136	2.4	11	0.729927
PAK1_IPI:IPI00289746.2	PAK1	PAK1	3	6	9 / 411	0.0218978	1.3	2	0.0284672
THOC4_IPI:IPI00328840.9	THOC4	Invalid identifier / gene not available	3	4		0			0
C1QBP_IPI:IPI00014230.1	C1QBP	C1QBP	3	4	223 / 411	0.542579	11.4	381	6.1854
RPS8_IPI:IPI00216587.9	RPS8	RPS8	3	3	228 / 411	0.554745	7.4	51	4.10511
MARCKSL1_IPI:IPI00641181.5	MARCKSL1	MARCKSL1	3	4	52 / 411	0.126521	2.2	9	0.278345
CSE1L_IPI:IPI00022744.5	CSE1L	CSE1L	3	4	126 / 411	0.306569	7.1	54	2.17664
RPLP2_IPI:IPI00008529.1	RPLP2	RPLP2	3	3	215 / 411	0.523114	6.1	117	3.191
EWSR1_IPI:IPI00009841.5	EWSR1	EWSR1	3	4	143 / 411	0.347932	20.6	339	7.1674
DDX17_IPI:IPI00023785.7	DDX17	DDX17	3	3	238 / 411	0.579075	8.4	80	4.86423
MCM7_IPI:IPI00219740.3	MCM7	MCM7	3	3	123 / 411	0.29927	7.2	59	2.15474
FAR1_IPI:IPI00386139.1	FAR1	FAR1	3	3	14 / 411	0.0340633	1.4	4	0.0476886
CHCHD3_IPI:IPI00015833.1	CHCHD3	CHCHD3	3	3	16 / 411	0.0389294	4.6	31	0.179075
EEF1A1_IPI:IPI00025447.8	EEF1A1	EEF1A1	3	5	350 / 411	0.851582	21.9	230	18.6496
RPS6_IPI:IPI00021840.1	RPS6	RPS6	3	3	208 / 411	0.506083	6.2	63	3.13771
CLPTM1L_IPI:IPI00151358.2	CLPTM1L	CLPTM1L	3	3	10 / 411	0.0243309	1.1	2	0.026764
AIFM1_IPI:IPI00000690.1	AIFM1	AIFM1	3	3	101 / 411	0.245742	7.8	92	1.91679
DPM1_IPI:IPI00022018.1	DPM1	DPM1	3	3	28 / 411	0.0681265	1.8	8	0.122628
MRPL37_IPI:IPI00162330.3	MRPL37	MRPL37	3	3	21 / 411	0.0510949	1.9	7	0.0970803
TAF15_IPI:IPI00020194.1	TAF15	TAF15	3	3	163 / 411	0.396594	4.9	35	1.94331
IGF2BP1_IPI:IPI00008557.5	IGF2BP1	IGF2BP1	3	3	114 / 411	0.277372	6.5	50	1.80292
EIF4G1_IPI:IPI00386533.3	EIF4G1	EIF4G1	3	3	102 / 411	0.248175	13.3	78	3.30073
EIF3G_IPI:IPI00290460.3	EIF3G	EIF3G	3	3	109 / 411	0.265207	4.3	38	1.14039
SLC25A12_IPI:IPI00386271.4	SLC25A12	SLC25A12	3	3	20 / 411	0.0486618	2.7	13	0.131387
TUBB_IPI:IPI00011654.2	TUBB	TUBB	3	8	382 / 411	0.92944	37.5	338	34.854
PHB2_IPI:IPI00027252.6	PHB2	PHB2	3	3	95 / 411	0.231144	5.9	47	1.36375
DNAJA1_IPI:IPI00012535.1	DNAJA1	DNAJA1	3	3	115 / 411	0.279805	3.6	15	1.0073
UBC_IPI:IPI00179330.6	UBC	UBC	3	9	233 / 411	0.56691	6.5	90	3.68491
TSR1_IPI:IPI00292894.5	TSR1	TSR1	3	3	65 / 411	0.158151	3.1	10	0.490268
RPL18_IPI:IPI00215719.6	RPL18	RPL18	3	4	191 / 411	0.46472	5.3	64	2.46302
HNRNPUL1_IPI:IPI00013070.2	HNRNPUL1	HNRNPUL1	3	3	106 / 411	0.257908	7.9	63	2.03747
ALDH3A2_IPI:IPI00333619.4	ALDH3A2	ALDH3A2	3	4	29 / 411	0.0705596	2.3	12	0.162287
GRAMD1A_IPI:IPI00168347.7	GRAMD1A	GRAMD1A	3	3	9 / 411	0.0218978	2.1	4	0.0459854
HSP90AA2_IPI:IPI00031523.4	HSP90AA2	Invalid identifier / gene not available	3	3		0			0
LUC7L2_IPI:IPI00006932.4	LUC7L2	C7orf55-LUC7L2	3	4	151 / 411	0.367397	15.8	106	5.80487
LRRC59_IPI:IPI00396321.1	LRRC59	LRRC59	3	3	80 / 411	0.194647	2.4	6	0.467153
EPRS_IPI:IPI00013452.9	EPRS	EPRS	3	3	157 / 411	0.381995	11.5	68	4.39294
CCT7_IPI:IPI00018465.1	CCT7	CCT7	3	3	172 / 411	0.418491	14.6	118	6.10998
TUBB1_IPI:IPI00006510.1	TUBB1	TUBB1	3	6	291 / 411	0.708029	6.8	62	4.8146
SRRT_IPI:IPI00220038.1	SRRT	SRRT	3	3	82 / 411	0.199513	6	43	1.19708
LOC348262_IPI:IPI00746221.2	LOC348262	Invalid identifier / gene not available	3	3		0			0
VARS_IPI:IPI00000873.3	VARS	VARS	3	3	100 / 411	0.243309	7.2	47	1.75182
EIF3B_IPI:IPI00396370.6	EIF3B	EIF3B	3	3	108 / 411	0.262774	5.4	42	1.41898
PHGDH_IPI:IPI00011200.5	PHGDH	PHGDH	3	3	152 / 411	0.36983	6.2	40	2.29294
VIM_IPI:IPI00418471.6	VIM	VIM	3	3	257 / 411	0.625304	39.5	754	24.6995
ERC1_IPI:IPI00171230.6	ERC1	ERC1	3	3	44 / 411	0.107056	3.3	11	0.353285
CLPB_IPI:IPI00006615.3	CLPB	CLPB	3	4	30 / 411	0.0729927	1.4	5	0.10219
RPN1_IPI:IPI00025874.2	RPN1	RPN1	3	3	91 / 411	0.221411	3.9	36	0.863504
GK_IPI:IPI00027424.3	GK	GK	3	4	6 / 411	0.0145985	1.7	3	0.0248175
EEF1A2_IPI:IPI00014424.1	EEF1A2	EEF1A2	3	4	343 / 411	0.83455	13.4	175	11.183
HADHA_IPI:IPI00031522.2	HADHA	HADHA	3	3	72 / 411	0.175182	6.8	39	1.19124
CAPRIN1_IPI:IPI00783872.2	CAPRIN1	CAPRIN1	3	3	120 / 411	0.291971	4.6	44	1.34307
DARS_IPI:IPI00216951.2	DARS	DARS	3	3	121 / 411	0.294404	5	35	1.47202
C14orf156_IPI:IPI00009922.3	C14ORF156	Invalid identifier / gene not available	3	3		0			0
RPL7_IPI:IPI00030179.3	RPL7	RPL7	3	3	175 / 411	0.425791	7.3	66	3.10827
SLC1A5_IPI:IPI00019472.4	SLC1A5	SLC1A5	3	4	70 / 411	0.170316	2.9	13	0.493917
CCT8_IPI:IPI00302925.4	CCT8	CCT8	3	3	183 / 411	0.445255	24.8	203	11.0423
BAG2_IPI:IPI00000643.1	BAG2	BAG2	3	4	96 / 411	0.233577	2.9	20	0.677372
RPS13_IPI:IPI00221089.5	RPS13	RPS13	3	3	158 / 411	0.384428	4.5	17	1.72993
PFKL_IPI:IPI00332371.9	PFKL	PFKL	3	3	67 / 411	0.163017	3.4	30	0.554258
KPNA2_IPI:IPI00002214.1	KPNA2	KPNA2	3	3	162 / 411	0.394161	4.7	36	1.85255
SFPQ_IPI:IPI00010740.1	SFPQ	SFPQ	3	5	201 / 411	0.489051	16.7	336	8.16715
GPSN2_IPI:IPI00100656.3	GPSN2	Invalid identifier / gene not available	3	4		0			0
RUVBL1_IPI:IPI00021187.4	RUVBL1	RUVBL1	3	3	152 / 411	0.36983	12.4	75	4.58589
ARF1_IPI:IPI00215914.5	ARF1	ARF1	3	3	99 / 411	0.240876	4.4	22	1.05985
RBM25_IPI:IPI00004273.6	RBM25	RBM25	3	3	77 / 411	0.187348	7.7	44	1.44258
TCOF1_IPI:IPI00165041.5	TCOF1	TCOF1	3	3	103 / 411	0.250608	23.1	126	5.78905
LBR_IPI:IPI00292135.1	LBR	LBR	3	3	54 / 411	0.131387	5.7	24	0.748905
TIMM44_IPI:IPI00306516.1	TIMM44	TIMM44	3	3	40 / 411	0.0973236	2.7	8	0.262774
ACTA2_IPI:IPI00008603.1	ACTA2	ACTA2	3	3	351 / 411	0.854015	18.6	294	15.8847
USP7_IPI:IPI00003965.5	USP7	USP7	3	3	65 / 411	0.158151	4.1	18	0.648418
TOMM22_IPI:IPI00024976.5	TOMM22	TOMM22	2	2	24 / 411	0.0583942	2.7	6	0.157664
RPL19_IPI:IPI00025329.1	RPL19	RPL19	2	2	210 / 411	0.510949	3.8	67	1.94161
ILF3_IPI:IPI00219330.2	ILF3	ILF3	2	2	158 / 411	0.384428	9.4	99	3.61363
HNRNPH1_IPI:IPI00013881.6	HNRNPH1	HNRNPH1	2	2	263 / 411	0.639903	13.7	201	8.76667
COPB2_IPI:IPI00220219.6	COPB2	COPB2	2	3	79 / 411	0.192214	3.6	23	0.691971
RPL11_IPI:IPI00376798.3	RPL11	RPL11	2	4	209 / 411	0.508516	3.7	20	1.88151
DNAJA2_IPI:IPI00032406.1	DNAJA2	DNAJA2	2	2	90 / 411	0.218978	3.1	9	0.678832
SERPINB3_IPI:IPI00022204.2	SERPINB3	SERPINB3	2	3	36 / 411	0.0875912	5.1	43	0.446715
ANXA2_IPI:IPI00418169.3	ANXA2	ANXA2	2	2	150 / 411	0.364964	7.8	54	2.84672
G3BP2_IPI:IPI00009057.2	G3BP2	G3BP2	2	2	59 / 411	0.143552	2.9	24	0.416302
RPL7A_IPI:IPI00299573.1	RPL7A	RPL7A	2	2	197 / 411	0.479319	6.8	48	3.25937
POLDIP3_IPI:IPI00429180.1	POLDIP3	POLDIP3	2	2	79 / 411	0.192214	6.2	27	1.19173
SLC16A1_IPI:IPI00024650.1	SLC16A1	SLC16A1	2	2	47 / 411	0.114355	2.4	7	0.274453
RPL22_IPI:IPI00219153.4	RPL22	RPL22	2	2	192 / 411	0.467153	3.3	26	1.54161
YME1L1_IPI:IPI00045946.4	YME1L1	YME1L1	2	3	8 / 411	0.0194647	1.1	2	0.0214112
RPL5_IPI:IPI00000494.6	RPL5	RPL5	2	3	156 / 411	0.379562	6.8	55	2.58102
SLC25A10_IPI:IPI00015920.2	SLC25A10	SLC25A10	2	2	32 / 411	0.0778589	3.1	16	0.241363
COPG_IPI:IPI00783982.1	COPG	COPG1	2	2	78 / 411	0.189781	3.2	19	0.607299
LSM12_IPI:IPI00410324.2	LSM12	LSM12	2	2	80 / 411	0.194647	2.7	13	0.525547
VDAC3_IPI:IPI00031804.1	VDAC3	VDAC3	2	2	46 / 411	0.111922	3.9	13	0.436496
FASN_IPI:IPI00026781.2	FASN	FASN	2	2	167 / 411	0.406326	49.4	548	20.0725
RPS7_IPI:IPI00013415.1	RPS7	RPS7	2	2	200 / 411	0.486618	5.9	27	2.87105
SLC25A6_IPI:IPI00291467.7	SLC25A6	SLC25A6	2	2	201 / 411	0.489051	7	119	3.42336
NSUN2_IPI:IPI00306369.3	NSUN2	NSUN2	2	2	78 / 411	0.189781	3.6	19	0.683212
RPL8_IPI:IPI00012772.8	RPL8	RPL8	2	2	157 / 411	0.381995	6	42	2.29197
LSM14A_IPI:IPI00410590.5	LSM14A	LSM14A	2	2	113 / 411	0.274939	6.6	30	1.8146
RPL9_IPI:IPI00031691.1	RPL9	RPL9	2	2	167 / 411	0.406326	5.7	68	2.31606
RBBP4_IPI:IPI00328319.8	RBBP4	RBBP4	2	2	148 / 411	0.360097	4	22	1.44039
SF3B1_IPI:IPI00026089.3	SF3B1	SF3B1	2	3	171 / 411	0.416058	17.8	142	7.40584
IPO5_IPI:IPI00514205.2	IPO5	IPO5	2	2	80 / 411	0.194647	4.5	30	0.875912
XPO1_IPI:IPI00298961.3	XPO1	XPO1	2	2	95 / 411	0.231144	4	51	0.924574
ILK-2_IPI:IPI00302927.6	ILK-2	Invalid identifier / gene not available	2	2		0			0
SMC4_IPI:IPI00328298.6	SMC4	SMC4	2	2	90 / 411	0.218978	5.2	26	1.13869
HSP90B1_IPI:IPI00027230.3	HSP90B1	HSP90B1	2	2	186 / 411	0.452555	13.1	96	5.92847
PSMC5_IPI:IPI00023919.4	PSMC5	PSMC5	2	2	116 / 411	0.282238	6.3	57	1.7781
ABCD3_IPI:IPI00002372.1	ABCD3	ABCD3	2	2	40 / 411	0.0973236	4	12	0.389294
HNRNPAB_IPI:IPI00106509.3	HNRNPAB	HNRNPAB	2	2	206 / 411	0.501217	3.6	20	1.80438
PPP2R2A_IPI:IPI00332511.5	PPP2R2A	PPP2R2A	2	3	93 / 411	0.226277	3.2	12	0.724088
CNP_IPI:IPI00220993.1	CNP	CNP	2	2	26 / 411	0.0632603	1.9	8	0.120195
PAWR_IPI:IPI00001871.2	PAWR	PAWR	2	2	27 / 411	0.0656934	1.4	4	0.0919708
MSH6_IPI:IPI00106847.3	MSH6	MSH6	2	2	56 / 411	0.136253	3.1	19	0.422384
CCT3_IPI:IPI00290770.3	CCT3	CCT3	2	2	165 / 411	0.40146	15.1	114	6.06204
ACACB_IPI:IPI00013003.2	ACACB	ACACB	2	2	60 / 411	0.145985	29.9	144	4.36496
XRN2_IPI:IPI00100151.4	XRN2	XRN2	2	2	97 / 411	0.23601	3.5	20	0.826034
PCCA_IPI:IPI00552419.2	PCCA	PCCA	2	2	94 / 411	0.22871	67.1	342	15.3465
EIF2S1_IPI:IPI00219678.3	EIF2S1	EIF2S1	2	2	101 / 411	0.245742	2.3	10	0.565207
RANP1_IPI:IPI00643041.3	RANP1	Invalid identifier / gene not available	2	3		0			0
SNRNP70_IPI:IPI00219483.1	SNRNP70	SNRNP70	2	2	108 / 411	0.262774	5.1	52	1.34015
CDC27_IPI:IPI00294575.7	CDC27	CDC27	2	2	24 / 411	0.0583942	2.3	6	0.134307
SSR1_IPI:IPI00301021.3	SSR1	SSR1	2	3	19 / 411	0.0462287	1.5	4	0.0693431
EIF3CL_IPI:IPI00016910.1	EIF3CL	EIF3CL	2	2	109 / 411	0.265207	4.9	26	1.29951
EIF2S3_IPI:IPI00297982.7	EIF2S3	EIF2S3	2	2	91 / 411	0.221411	3.6	13	0.79708
RAB18_IPI:IPI00014577.1	RAB18	RAB18	2	2	12 / 411	0.0291971	1.6	4	0.0467153
ACSL3_IPI:IPI00031397.3	ACSL3	ACSL3	2	2	48 / 411	0.116788	1.7	16	0.19854
LETM1_IPI:IPI00017592.1	LETM1	LETM1	2	2	18 / 411	0.0437956	1.6	9	0.070073
UBAP2L_IPI:IPI00029019.6	UBAP2L	UBAP2L	2	2	129 / 411	0.313869	10.4	41	3.26423
MYBBP1A_IPI:IPI00005024.3	MYBBP1A	MYBBP1A	2	2	112 / 411	0.272506	8.6	51	2.34355
LARP1_IPI:IPI00185919.3	LARP1	LARP1	2	2	78 / 411	0.189781	12.1	46	2.29635
MRPS22_IPI:IPI00013146.1	MRPS22	MRPS22	2	2	32 / 411	0.0778589	2.5	10	0.194647
ACTBL2_IPI:IPI00003269.1	ACTBL2	ACTBL2	2	4	329 / 411	0.800487	9.1	129	7.28443
RUVBL2_IPI:IPI00009104.7	RUVBL2	RUVBL2	2	2	141 / 411	0.343066	10.4	93	3.56788
MDN1_IPI:IPI00167941.1	MDN1	MDN1	2	2	27 / 411	0.0656934	2.4	8	0.157664
RPL15_IPI:IPI00470528.5	RPL15	RPL15	2	2	149 / 411	0.36253	6.6	30	2.3927
FANCI_IPI:IPI00019447.6	FANCI	FANCI	2	2	33 / 411	0.080292	2.3	8	0.184672
TRIP13_IPI:IPI00003505.3	TRIP13	TRIP13	2	2	27 / 411	0.0656934	2.2	7	0.144526
HSPD1_IPI:IPI00076042.2	HSPD1	HSPD1	2	2	231 / 411	0.562044	17.9	165	10.0606
HM13_IPI:IPI00152441.3	HM13	HM13	2	2	22 / 411	0.053528	1.2	4	0.0642336
PCNA_IPI:IPI00021700.3	PCNA	PCNA	2	2	97 / 411	0.23601	4.8	23	1.13285
RPLP0_IPI:IPI00008530.1	RPLP0	RPLP0	2	2	206 / 411	0.501217	7.1	47	3.55864
EIF4G1_IPI:IPI00220365.6	EIF4G1	EIF4G1	2	3	102 / 411	0.248175	13.3	78	3.30073
HNRNPA2B1_IPI:IPI00386854.6	HNRNPA2B1	HNRNPA2B1	2	2	262 / 411	0.63747	11.3	67	7.20341
CCBL2_IPI:IPI00061178.1	CCBL2	CCBL2	2	2	1 / 411	0.00243309	3	3	0.00729927
HSD17B12_IPI:IPI00007676.3	HSD17B12	HSD17B12	2	2	27 / 411	0.0656934	1.9	7	0.124818
RPL17_IPI:IPI00413324.6	RPL17	RPL17-C18orf32	2	2	190 / 411	0.462287	4.6	29	2.12652
STT3A_IPI:IPI00297492.2	STT3A	STT3A	2	2	23 / 411	0.0559611	1.7	7	0.0951338
IGHA1_IPI:IPI00383164.1	IGHA1	Invalid identifier / gene not available	2	2		0			0
RPL13P12_IPI:IPI00397611.2	RPL13P12	Invalid identifier / gene not available	2	2		0			0
ABCB10_IPI:IPI00015826.2	ABCB10	ABCB10	2	2	7 / 411	0.0170316	1.3	3	0.0221411
CTPS_IPI:IPI00290142.5	CTPS	Invalid identifier / gene not available	2	2		0			0
PRMT5_IPI:IPI00064328.3	PRMT5	PRMT5	2	2	175 / 411	0.425791	156.6	2950	66.6788
RBM39_IPI:IPI00163505.2	RBM39	RBM39	2	3	163 / 411	0.396594	11.1	85	4.40219
MTDH_IPI:IPI00328715.4	MTDH	MTDH	2	2	50 / 411	0.121655	5.4	16	0.656934
EIF3I_IPI:IPI00012795.3	EIF3I	EIF3I	2	2	128 / 411	0.311436	5.8	39	1.80633
SFRS7_IPI:IPI00003377.1	SFRS7	Invalid identifier / gene not available	2	2		0			0
PSMD3_IPI:IPI00011603.2	PSMD3	PSMD3	2	2	111 / 411	0.270073	6.2	34	1.67445
HNRNPA1_IPI:IPI00215965.2	HNRNPA1	HNRNPA1	2	2	268 / 411	0.652068	9.2	68	5.99903
RPL3_IPI:IPI00550021.4	RPL3	RPL3	2	2	163 / 411	0.396594	10.5	142	4.16423
NONO_IPI:IPI00304596.3	NONO	NONO	2	2	220 / 411	0.53528	18.8	386	10.0633
HUWE1_IPI:IPI00179298.5	HUWE1	HUWE1	2	2	74 / 411	0.180049	11.1	85	1.99854
MSH2_IPI:IPI00017303.1	MSH2	MSH2	2	2	45 / 411	0.109489	3	27	0.328467
DDX1_IPI:IPI00293655.3	DDX1	DDX1	2	2	125 / 411	0.304136	5.7	34	1.73358
FARSA_IPI:IPI00031820.3	FARSA	FARSA	2	2	60 / 411	0.145985	2.9	11	0.423358
RFC2_IPI:IPI00017412.1	RFC2	RFC2	2	2	56 / 411	0.136253	2.4	7	0.327007
KPNB1_IPI:IPI00001639.2	KPNB1	KPNB1	2	2	161 / 411	0.391727	9.5	62	3.72141
DDX19B_IPI:IPI00008943.3	DDX19B	DDX19B	2	2	19 / 411	0.0462287	1.3	3	0.0600973
HSPA4_IPI:IPI00002966.2	HSPA4	HSPA4	2	2	133 / 411	0.323601	11.3	58	3.65669
PUF60_IPI:IPI00069750.2	PUF60	PUF60	2	2	145 / 411	0.352798	12.7	88	4.48054
RPL31_IPI:IPI00026302.3	RPL31	RPL31	2	4	170 / 411	0.413625	3.2	21	1.3236
PRDX2_IPI:IPI00027350.3	PRDX2	PRDX2	2	2	205 / 411	0.498783	5.1	54	2.5438
FAM62B_IPI:IPI00409635.2	FAM62B	Invalid identifier / gene not available	2	2		0			0
TFAM_IPI:IPI00020928.1	TFAM	TFAM	2	2	21 / 411	0.0510949	2	7	0.10219
RPL27A_IPI:IPI00456758.4	RPL27A	RPL27A	2	3	198 / 411	0.481752	3.2	19	1.54161
EEF1G_IPI:IPI00000875.7	EEF1G	EEF1G	2	2	193 / 411	0.469586	7.6	41	3.56886
RBM22_IPI:IPI00019046.4	RBM22	RBM22	2	2	25 / 411	0.0608273	4.8	16	0.291971
HNRNPA2B1_IPI:IPI00396378.3	HNRNPA2B1	HNRNPA2B1	2	2	262 / 411	0.63747	11.3	67	7.20341
RAC1_IPI:IPI00010271.3	RAC1	RAC1	2	2	15 / 411	0.0364964	1.8	5	0.0656934
RPL7AP27_IPI:IPI00075558.9	RPL7AP27	Invalid identifier / gene not available	2	2		0			0
HNRNPA3_IPI:IPI00419373.1	HNRNPA3	HNRNPA3	2	2	183 / 411	0.445255	4.4	43	1.95912
ATP5O_IPI:IPI00007611.1	ATP5O	ATP5O	2	2	51 / 411	0.124088	2.8	9	0.347445
HIST1H4J_IPI:IPI00453473.6	HIST1H4J	HIST1H4J	2	2	225 / 411	0.547445	13.6	316	7.44526
EIF3A_IPI:IPI00029012.1	EIF3A	EIF3A	2	2	111 / 411	0.270073	7.5	56	2.02555
SEC63_IPI:IPI00218922.5	SEC63	SEC63	2	2	11 / 411	0.026764	2.1	11	0.0562044
RPS7P4_IPI:IPI00008293.4	RPS7P4	Invalid identifier / gene not available	2	2		0			0
RPL28_IPI:IPI00182533.5	RPL28	RPL28	2	2	109 / 411	0.265207	5.7	24	1.51168
PRPF8_IPI:IPI00007928.4	PRPF8	PRPF8	2	2	161 / 411	0.391727	15	117	5.87591
AP2A2_IPI:IPI00016621.7	AP2A2	AP2A2	2	2	21 / 411	0.0510949	2	10	0.10219
MAP1B_IPI:IPI00008868.3	MAP1B	MAP1B	2	2	94 / 411	0.22871	19	184	4.3455
PGAM5_IPI:IPI00063242.5	PGAM5	PGAM5	2	2	73 / 411	0.177616	5.2	29	0.923601
RAC2_IPI:IPI00010270.1	RAC2	RAC2	2	2	13 / 411	0.0316302	1.5	5	0.0474453
TM9SF2_IPI:IPI00018415.1	TM9SF2	TM9SF2	1	1	1 / 411	0.00243309	1	1	0.00243309
CLPTM1_IPI:IPI00396411.4	CLPTM1	CLPTM1	1	1	2 / 411	0.00486618	1	1	0.00486618
TUBA1A_IPI:IPI00180675.4	TUBA1A	TUBA1A	1	1	389 / 411	0.946472	34.9	299	33.0319
CHCHD4_IPI:IPI00177428.1	CHCHD4	CHCHD4	1	1	17 / 411	0.0413625	2.9	7	0.119951
TUBA1C_IPI:IPI00218343.4	TUBA1C	TUBA1C	1	1	389 / 411	0.946472	37	281	35.0195
TIMM23_IPI:IPI00007309.1	TIMM23	TIMM23	1	1	14 / 411	0.0340633	1.6	6	0.0545012
ARHGEF7_IPI:IPI00449908.6	ARHGEF7	ARHGEF7	1	1	10 / 411	0.0243309	1.2	2	0.0291971
TMEM165_IPI:IPI00307572.1	TMEM165	TMEM165	1	1	14 / 411	0.0340633	1.4	2	0.0476886
HAT1_IPI:IPI00024719.1	HAT1	HAT1	1	1	41 / 411	0.0997567	1.9	10	0.189538
KCMF1_IPI:IPI00306661.3	KCMF1	KCMF1	1	1	11 / 411	0.026764	1.4	2	0.0374696
PCCB_IPI:IPI00007247.4	PCCB	PCCB	1	1	93 / 411	0.226277	48.4	263	10.9518
PSMC1_IPI:IPI00011126.6	PSMC1	PSMC1	1	1	95 / 411	0.231144	5.2	43	1.20195
DHCR7_IPI:IPI00294501.1	DHCR7	DHCR7	1	1	17 / 411	0.0413625	1.8	6	0.0744526
LUC7L_IPI:IPI00071318.1	LUC7L	LUC7L	1	1	118 / 411	0.287105	6.5	42	1.86618
PREB_IPI:IPI00033349.3	PREB	PREB	1	1	4 / 411	0.00973236	1.8	3	0.0175182
ATP1A2_IPI:IPI00647102.4	ATP1A2	ATP1A2	1	1	94 / 411	0.22871	3.4	42	0.777616
RNPS1_IPI:IPI00033561.3	RNPS1	RNPS1	1	1	109 / 411	0.265207	3.6	16	0.954745
SAMM50_IPI:IPI00412713.4	SAMM50	SAMM50	1	1	8 / 411	0.0194647	3.6	12	0.070073
RPL23_IPI:IPI00010153.5	RPL23	RPL23	1	1	243 / 411	0.591241	5.7	48	3.37007
EIF3H_IPI:IPI00647650.3	EIF3H	EIF3H	1	1	83 / 411	0.201946	2.7	14	0.545255
ERP44_IPI:IPI00401264.5	ERP44	ERP44	1	1	11 / 411	0.026764	1.3	2	0.0347932
IPI:IPI00069693.4_IPI:IPI00069693.4	IPI:IPI00069693	Invalid identifier / gene not available	1	1		0			0
C3orf1_IPI:IPI00299387.3	C3ORF1	Invalid identifier / gene not available	1	1		0			0
CYBA_IPI:IPI00218433.5	CYBA	CYBA	1	1	0 / 411	0	0	0	0
RER1_IPI:IPI00005728.2	RER1	RER1	1	1	2 / 411	0.00486618	1	1	0.00486618
RPS24_IPI:IPI00029750.1	RPS24	RPS24	1	1	179 / 411	0.435523	4.7	36	2.04696
RPN2_IPI:IPI00028635.4	RPN2	RPN2	1	1	82 / 411	0.199513	2.9	29	0.578589
RPS10_IPI:IPI00008438.1	RPS10	RPS10	1	1	177 / 411	0.430657	5.4	32	2.32555
RPL29P30_IPI:IPI00052885.7	RPL29P30	Invalid identifier / gene not available	1	1		0			0
NUDT21_IPI:IPI00646917.1	NUDT21	NUDT21	1	1	119 / 411	0.289538	4.5	20	1.30292
CABC1_IPI:IPI00176469.2	CABC1	ADCK3	1	1	11 / 411	0.026764	1.2	2	0.0321168
PPP2CA_IPI:IPI00008380.1	PPP2CA	PPP2CA	1	1	84 / 411	0.20438	2.2	9	0.449635
MRPL14_IPI:IPI00418290.1	MRPL14	MRPL14	1	1	17 / 411	0.0413625	1.2	3	0.049635
BYSL_IPI:IPI00328987.3	BYSL	BYSL	1	1	56 / 411	0.136253	1.6	5	0.218005
RPL14_IPI:IPI00555744.6	RPL14	RPL14	1	1	156 / 411	0.379562	4.4	33	1.67007
RARS_IPI:IPI00004860.2	RARS	RARS	1	1	110 / 411	0.26764	7.1	34	1.90024
RPL24_IPI:IPI00306332.4	RPL24	RPL24	1	1	195 / 411	0.474453	4.1	22	1.94526
SPTLC1_IPI:IPI00005745.1	SPTLC1	SPTLC1	1	1	12 / 411	0.0291971	1.4	3	0.0408759
BCKDHA_IPI:IPI00025100.1	BCKDHA	BCKDHA	1	1	52 / 411	0.126521	14	69	1.77129
SARS2_IPI:IPI00328361.7	SARS2	SARS2	1	1	31 / 411	0.0754258	2	11	0.150852
MRPS18B_IPI:IPI00022316.3	MRPS18B	MRPS18B	1	1	27 / 411	0.0656934	1.9	6	0.124818
HNRNPD_IPI:IPI00028888.1	HNRNPD	HNRNPD	1	1	216 / 411	0.525547	4.2	28	2.2073
DLST_IPI:IPI00384122.5	DLST	DLST	1	1	57 / 411	0.138686	3.7	20	0.513139
NDUFS1_IPI:IPI00604664.5	NDUFS1	NDUFS1	1	1	19 / 411	0.0462287	4.4	33	0.203406
C14orf166_IPI:IPI00006980.1	C14ORF166	C14orf166	1	1	92 / 411	0.223844	3.7	15	0.828224
RPS20_IPI:IPI00012493.1	RPS20	RPS20	1	1	179 / 411	0.435523	3.6	23	1.56788
SAPS3_IPI:IPI00019540.1	SAPS3	PPP6R3	1	1	37 / 411	0.0900243	2	9	0.180049
EIF4A1_IPI:IPI00025491.1	EIF4A1	EIF4A1	1	1	190 / 411	0.462287	9.2	87	4.25304
DNAJC11_IPI:IPI00027984.4	DNAJC11	DNAJC11	1	1	10 / 411	0.0243309	1.2	2	0.0291971
DLST_IPI:IPI00384016.1	DLST	DLST	1	1	57 / 411	0.138686	3.7	20	0.513139
GALNT2_IPI:IPI00004669.1	GALNT2	GALNT2	1	1	11 / 411	0.026764	1.4	3	0.0374696
MCM5_IPI:IPI00018350.3	MCM5	MCM5	1	1	100 / 411	0.243309	5	34	1.21655
NAP1L1_IPI:IPI00023860.1	NAP1L1	NAP1L1	1	1	152 / 411	0.36983	5.2	25	1.92311
AASS_IPI:IPI00033217.3	AASS	AASS	1	1	9 / 411	0.0218978	1.7	6	0.0372263
MYL6_IPI:IPI00335168.9	MYL6	MYL6	1	1	190 / 411	0.462287	4.5	42	2.08029
RBMXL2_IPI:IPI00004450.2	RBMXL2	RBMXL2	1	1	94 / 411	0.22871	2.7	12	0.617518
ERLIN2_IPI:IPI00026942.5	ERLIN2	ERLIN2	1	1	45 / 411	0.109489	2.2	23	0.240876
RPS23_IPI:IPI00218606.7	RPS23	RPS23	1	1	160 / 411	0.389294	4.7	28	1.82968
EPB41L2_IPI:IPI00015973.1	EPB41L2	EPB41L2	1	1	51 / 411	0.124088	15.3	58	1.89854
HIST1H2AB_IPI:IPI00026272.2	HIST1H2AB	HIST1H2AE	1	1	271 / 411	0.659367	10	217	6.59367
HNRPDL_IPI:IPI00011274.3	HNRPDL	Invalid identifier / gene not available	1	1		0			0
DNAJB4_IPI:IPI00003848.1	DNAJB4	DNAJB4	1	1	7 / 411	0.0170316	1	1	0.0170316
HSP90AB1_IPI:IPI00411633.4	HSP90AB1	HSP90AB1	1	1	277 / 411	0.673966	30.7	278	20.6908
TXN_IPI:IPI00216298.6	TXN	TXN	1	1	174 / 411	0.423358	2.6	10	1.10073
IPI:IPI00556589.3_IPI:IPI00556589.3	IPI:IPI00556589	Invalid identifier / gene not available	1	1		0			0
UQCRC2_IPI:IPI00305383.1	UQCRC2	UQCRC2	1	1	38 / 411	0.0924574	3.5	20	0.323601
LMNB1_IPI:IPI00217975.4	LMNB1	LMNB1	1	1	117 / 411	0.284672	7.7	106	2.19197
SCD_IPI:IPI00299468.3	SCD	SCD	1	1	6 / 411	0.0145985	1.2	2	0.0175182
COPE_IPI:IPI00399318.1	COPE	COPE	1	1	34 / 411	0.0827251	2	5	0.16545
DHRS7B_IPI:IPI00550165.4	DHRS7B	DHRS7B	1	1	6 / 411	0.0145985	1.3	2	0.0189781
PRPF40A_IPI:IPI00337385.3	PRPF40A	PRPF40A	1	1	76 / 411	0.184915	5.9	30	1.091
TOMM20_IPI:IPI00016676.1	TOMM20	TOMM20	1	1	5 / 411	0.0121655	1.2	2	0.0145985
DSG1_IPI:IPI00025753.1	DSG1	DSG1	1	1	82 / 411	0.199513	10	53	1.99513
HNRNPAB_IPI:IPI00334587.1	HNRNPAB	HNRNPAB	1	1	206 / 411	0.501217	3.6	20	1.80438
PKM2_IPI:IPI00479186.7	PKM2	PKM	1	1	249 / 411	0.605839	17.7	181	10.7234
SKP1_IPI:IPI00301364.3	SKP1	SKP1	1	1	145 / 411	0.352798	3.2	63	1.12895
U2AF1_IPI:IPI00005613.3	U2AF1	U2AF1	1	1	127 / 411	0.309002	3.4	14	1.05061
MRPL12_IPI:IPI00005537.2	MRPL12	MRPL12	1	1	74 / 411	0.180049	1.9	9	0.342092
NCAPD3_IPI:IPI00747787.2	NCAPD3	NCAPD3	1	1	8 / 411	0.0194647	1.4	4	0.0272506
SNRPD3_IPI:IPI00017964.1	SNRPD3	SNRPD3	1	1	176 / 411	0.428224	6.9	152	2.95474
GAPDH_IPI:IPI00219018.7	GAPDH	GAPDH	1	1	248 / 411	0.603406	13	97	7.84428
LTV1_IPI:IPI00153032.1	LTV1	LTV1	1	1	50 / 411	0.121655	2.2	8	0.26764
RHOT2_IPI:IPI00465059.4	RHOT2	RHOT2	1	1	9 / 411	0.0218978	1.3	2	0.0284672
SCO2_IPI:IPI00014458.1	SCO2	SCO2	1	1	19 / 411	0.0462287	1.8	9	0.0832117
RPL13_IPI:IPI00465361.4	RPL13	RPL13	1	1	218 / 411	0.530414	5.4	49	2.86423
SNRPB_IPI:IPI00027285.1	SNRPB	SNRPB	1	1	170 / 411	0.413625	11.2	196	4.6326
PGRMC1_IPI:IPI00220739.3	PGRMC1	PGRMC1	1	1	40 / 411	0.0973236	1.6	4	0.155718
LOC100131813_IPI:IPI00886929.1	LOC100131813	Invalid identifier / gene not available	1	1		0			0
IPI:IPI00911039.1_IPI:IPI00911039.1	IPI:IPI00911039	Invalid identifier / gene not available	1	1		0			0
RANBP6_IPI:IPI00514622.2	RANBP6	RANBP6	1	1	12 / 411	0.0291971	1.2	2	0.0350365
FAM98A_IPI:IPI00174442.2	FAM98A	FAM98A	1	1	43 / 411	0.104623	2.3	17	0.240633
IPI:IPI00384397.1_IPI:IPI00384397.1	IPI:IPI00384397	Invalid identifier / gene not available	1	1		0			0
RFC3_IPI:IPI00031521.1	RFC3	RFC3	1	1	37 / 411	0.0900243	1.6	6	0.144039
IPI:IPI00176692.7_IPI:IPI00176692.7	IPI:IPI00176692	Invalid identifier / gene not available	1	1		0			0
PSMC2_IPI:IPI00021435.3	PSMC2	PSMC2	1	1	126 / 411	0.306569	5.6	45	1.71679
UBAP2L_IPI:IPI00005416.5	UBAP2L	UBAP2L	1	1	129 / 411	0.313869	10.4	41	3.26423
EIF3F_IPI:IPI00654777.2	EIF3F	EIF3F	1	1	112 / 411	0.272506	3.5	16	0.953771
RHOT1_IPI:IPI00217536.3	RHOT1	RHOT1	1	1	4 / 411	0.00973236	1.3	2	0.0126521
NDUFS3_IPI:IPI00025796.3	NDUFS3	NDUFS3	1	1	19 / 411	0.0462287	2.3	9	0.106326
CCT6A_IPI:IPI00027626.3	CCT6A	CCT6A	1	1	177 / 411	0.430657	15	153	6.45985
LTF_IPI:IPI00298860.6	LTF	LTF	1	1	28 / 411	0.0681265	3.4	16	0.23163
GBF1_IPI:IPI00021954.1	GBF1	GBF1	1	1	6 / 411	0.0145985	1.5	4	0.0218978
ATP4A_IPI:IPI00218919.7	ATP4A	ATP4A	1	1	64 / 411	0.155718	1.6	9	0.249148
GALK1_IPI:IPI00019383.2	GALK1	GALK1	1	1	12 / 411	0.0291971	3	8	0.0875912
STK24_IPI:IPI00002212.1	STK24	STK24	1	1	15 / 411	0.0364964	1.3	4	0.0474453
FKBP4_IPI:IPI00219005.3	FKBP4	FKBP4	1	1	95 / 411	0.231144	6.7	52	1.54866
TUBB2B_IPI:IPI00031370.3	TUBB2B	TUBB2B	1	1	372 / 411	0.905109	26.6	301	24.0759
C3orf31_IPI:IPI00060287.3	C3ORF31	Invalid identifier / gene not available	1	1		0			0
CHCHD1_IPI:IPI00060107.3	CHCHD1	CHCHD1	1	1	26 / 411	0.0632603	1.7	3	0.107543
GFPT1_IPI:IPI00217952.6	GFPT1	GFPT1	1	1	15 / 411	0.0364964	2.8	16	0.10219
SFXN3_IPI:IPI00793874.1	SFXN3	SFXN3	1	1	4 / 411	0.00973236	4.8	9	0.0467153
GEMIN5_IPI:IPI00291783.3	GEMIN5	GEMIN5	1	1	44 / 411	0.107056	17.7	63	1.89489
H1FX_IPI:IPI00021924.1	H1FX	H1FX	1	1	121 / 411	0.294404	3.4	17	1.00097
AGPAT5_IPI:IPI00028491.4	AGPAT5	AGPAT5	1	1	3 / 411	0.00729927	5	8	0.0364964
ZC3HAV1_IPI:IPI00332936.1	ZC3HAV1	ZC3HAV1	1	1	58 / 411	0.141119	6.3	28	0.889051
MATR3_IPI:IPI00017297.1	MATR3	MATR3	1	1	171 / 411	0.416058	11.1	96	4.61825
SAMHD1_IPI:IPI00294739.1	SAMHD1	SAMHD1	1	1	18 / 411	0.0437956	2.3	13	0.10073
TIMM13_IPI:IPI00001589.1	TIMM13	TIMM13	1	1	65 / 411	0.158151	4.7	38	0.743309
MRPL4_IPI:IPI00023334.1	MRPL4	MRPL4	1	1	15 / 411	0.0364964	1.5	3	0.0547445
MOGS_IPI:IPI00328170.9	MOGS	MOGS	1	1	15 / 411	0.0364964	1.7	6	0.0620438
NUP93_IPI:IPI00397904.6	NUP93	NUP93	1	1	58 / 411	0.141119	3.8	17	0.536253
GNAI2_IPI:IPI00217906.3	GNAI2	GNAI2	1	1	50 / 411	0.121655	3.9	25	0.474453
SLC1A3_IPI:IPI00015473.3	SLC1A3	SLC1A3	1	1	7 / 411	0.0170316	1	1	0.0170316
CANX_IPI:IPI00020984.2	CANX	CANX	1	1	126 / 411	0.306569	5.1	29	1.5635
ATP2A3_IPI:IPI00004092.2	ATP2A3	ATP2A3	1	1	35 / 411	0.0851582	2.7	20	0.229927
SRRM1_IPI:IPI00328293.3	SRRM1	SRRM1	1	1	79 / 411	0.192214	5.9	40	1.13406
HSD17B4_IPI:IPI00019912.3	HSD17B4	HSD17B4	1	1	68 / 411	0.16545	4.9	48	0.810706
HAX1_IPI:IPI00010440.5	HAX1	HAX1	1	1	29 / 411	0.0705596	1.7	7	0.119951
IMMT_IPI:IPI00554469.1	IMMT	IMMT	1	1	44 / 411	0.107056	5.4	72	0.578102
AAAS_IPI:IPI00024143.4	AAAS	AAAS	1	1	8 / 411	0.0194647	2	6	0.0389294
PPP2R1A_IPI:IPI00168184.8	PPP2R1A	PPP2R1A	1	1	132 / 411	0.321168	5.4	43	1.73431
HNRNPA0_IPI:IPI00011913.1	HNRNPA0	HNRNPA0	1	1	164 / 411	0.399027	4.3	31	1.71582
RPL35_IPI:IPI00412607.6	RPL35	RPL35	1	1	156 / 411	0.379562	3.2	56	1.2146
TMEM33_IPI:IPI00299084.1	TMEM33	TMEM33	1	1	34 / 411	0.0827251	1.9	6	0.157178
CPSF6_IPI:IPI00012998.2	CPSF6	CPSF6	1	1	137 / 411	0.333333	4.5	21	1.5
GTF3C3_IPI:IPI00015806.3	GTF3C3	GTF3C3	1	1	31 / 411	0.0754258	2.5	13	0.188564
EPB41L3_IPI:IPI00032230.2	EPB41L3	EPB41L3	1	1	55 / 411	0.13382	9.6	72	1.28467
NACC1_IPI:IPI00045207.2	NACC1	NACC1	1	1	19 / 411	0.0462287	2.6	5	0.120195
SLC38A2_IPI:IPI00410034.2	SLC38A2	SLC38A2	1	1	15 / 411	0.0364964	2.2	7	0.080292
DNAJB6_IPI:IPI00024523.2	DNAJB6	DNAJB6	1	1	25 / 411	0.0608273	1.5	6	0.0912409
AGK_IPI:IPI00019353.4	AGK	AGK	1	1	16 / 411	0.0389294	1.6	4	0.0622871
FAM82A2_IPI:IPI00410079.3	FAM82A2	Invalid identifier / gene not available	1	1		0			0
CIRBP_IPI:IPI00180954.4	CIRBP	CIRBP	1	1	107 / 411	0.260341	8.2	35	2.13479
SAA4_IPI:IPI00019399.1	SAA4	SAA4	1	1	0 / 411	0	0	0	0
RPL13A_IPI:IPI00304612.9	RPL13A	RPL13A	1	1	144 / 411	0.350365	5.1	65	1.78686
PRAF2_IPI:IPI00026994.3	PRAF2	PRAF2	1	1	6 / 411	0.0145985	1	1	0.0145985
ADD1_IPI:IPI00019901.1	ADD1	ADD1	1	1	42 / 411	0.10219	4.6	20	0.470073
TIMM17B_IPI:IPI00219833.2	TIMM17B	TIMM17B	1	1	1 / 411	0.00243309	1	1	0.00243309
RPS27_IPI:IPI00513971.5	RPS27	RPS27	1	1	185 / 411	0.450122	3	28	1.35036
SSB_IPI:IPI00009032.1	SSB	SSB	1	1	102 / 411	0.248175	3.9	26	0.967883
RPL38_IPI:IPI00215790.6	RPL38	RPL38	1	1	139 / 411	0.3382	9	58	3.0438
SNRPB2_IPI:IPI00029267.1	SNRPB2	SNRPB2	1	1	94 / 411	0.22871	2.7	13	0.617518
UBR4_IPI:IPI00514902.1	UBR4	UBR4	1	1	36 / 411	0.0875912	15.2	76	1.33139
SUCLA2_IPI:IPI00217232.2	SUCLA2	SUCLA2	1	1	10 / 411	0.0243309	3.2	7	0.0778589
ACSL4_IPI:IPI00029737.1	ACSL4	ACSL4	1	1	39 / 411	0.0948905	1.2	4	0.113869
NIPSNAP1_IPI:IPI00304435.3	NIPSNAP1	NIPSNAP1	1	1	14 / 411	0.0340633	1.9	4	0.0647202
RAB5C_IPI:IPI00016339.4	RAB5C	RAB5C	1	1	61 / 411	0.148418	2.5	10	0.371046
IPI:IPI00383732.1_IPI:IPI00383732.1	IPI:IPI00383732	Invalid identifier / gene not available	1	1		0			0
C16orf80_IPI:IPI00001655.1	C16ORF80	C16orf80	1	1	20 / 411	0.0486618	2.4	6	0.116788
WHSC2_IPI:IPI00394679.3	WHSC2	NELFA	1	1	10 / 411	0.0243309	1.2	2	0.0291971
NUP155_IPI:IPI00026625.1	NUP155	NUP155	1	1	49 / 411	0.119221	4	26	0.476886
IPI:IPI00550731.2_IPI:IPI00550731.2	IPI:IPI00550731	Invalid identifier / gene not available	1	1		0			0
SDHA_IPI:IPI00305166.2	SDHA	SDHA	1	1	44 / 411	0.107056	4.3	22	0.460341
SEC22B_IPI:IPI00006865.3	SEC22B	Invalid identifier / gene not available	1	1		0			0
GMPPA_IPI:IPI00101782.3	GMPPA	GMPPA	1	1	3 / 411	0.00729927	1	1	0.00729927
PAF1_IPI:IPI00024883.1	PAF1	PAF1	1	1	50 / 411	0.121655	4.6	22	0.559611
RPS11_IPI:IPI00025091.3	RPS11	RPS11	1	1	151 / 411	0.367397	4.3	22	1.57981
DYNC1H1_IPI:IPI00456969.1	DYNC1H1	DYNC1H1	1	1	131 / 411	0.318735	16.6	121	5.291
MTHFD1L_IPI:IPI00291646.3	MTHFD1L	MTHFD1L	1	1	75 / 411	0.182482	5.5	40	1.00365
FAU_IPI:IPI00019770.3	FAU	FAU	1	1	143 / 411	0.347932	2.3	11	0.800243
SLC25A4_IPI:IPI00022891.3	SLC25A4	SLC25A4	1	1	195 / 411	0.474453	5.1	40	2.41971
FAM120A_IPI:IPI00039626.3	FAM120A	FAM120A	1	1	35 / 411	0.0851582	6.1	78	0.519465
EXOSC6_IPI:IPI00073602.1	EXOSC6	EXOSC6	1	1	72 / 411	0.175182	1.9	5	0.332847
SF3B3_IPI:IPI00300371.5	SF3B3	SF3B3	1	1	173 / 411	0.420925	12.9	224	5.42993
SCCPDH_IPI:IPI00329600.3	SCCPDH	SCCPDH	1	1	7 / 411	0.0170316	1	1	0.0170316
ELP2_IPI:IPI00015560.7	ELP2	ELP2	1	1	4 / 411	0.00973236	1	1	0.00973236
WDR61_IPI:IPI00019269.3	WDR61	WDR61	1	1	48 / 411	0.116788	2.6	16	0.30365
CCT5_IPI:IPI00010720.1	CCT5	CCT5	1	1	182 / 411	0.442822	17.9	119	7.92652
IPI:IPI00164838.4_IPI:IPI00164838.4	IPI:IPI00164838	Invalid identifier / gene not available	1	1		0			0
RPLP1_IPI:IPI00008527.3	RPLP1	RPLP1	1	1	180 / 411	0.437956	3.5	35	1.53285
TUBB4_IPI:IPI00023598.2	TUBB4	Invalid identifier / gene not available	1	1		0			0
MRPS14_IPI:IPI00005050.1	MRPS14	MRPS14	1	1	16 / 411	0.0389294	1.2	2	0.0467153
PTCD3_IPI:IPI00783302.1	PTCD3	PTCD3	1	1	30 / 411	0.0729927	2.1	6	0.153285
MRPL22_IPI:IPI00414410.2	MRPL22	MRPL22	1	1	22 / 411	0.053528	1.6	5	0.0856448
IDH2_IPI:IPI00011107.2	IDH2	IDH2	1	1	19 / 411	0.0462287	2.8	7	0.12944
TMEM109_IPI:IPI00031697.1	TMEM109	TMEM109	1	1	29 / 411	0.0705596	1.4	3	0.0987835
CDK3_IPI:IPI00023503.4	CDK3	CDK3	1	1	44 / 411	0.107056	1.8	5	0.192701
WDR77_IPI:IPI00012202.1	WDR77	WDR77	1	1	162 / 411	0.394161	60.4	1143	23.8073
EPB41_IPI:IPI00003921.2	EPB41	EPB41	1	1	36 / 411	0.0875912	10.5	38	0.919708
GTF2F1_IPI:IPI00017450.2	GTF2F1	GTF2F1	1	1	45 / 411	0.109489	2.6	14	0.284672
C21orf29_IPI:IPI00170597.1	C21ORF29	Invalid identifier / gene not available	1	1		0			0
RPS27L_IPI:IPI00420117.6	RPS27L	RPS27L	1	1	166 / 411	0.403893	2.4	18	0.969343
KTN1_IPI:IPI00328753.1	KTN1	KTN1	1	1	39 / 411	0.0948905	6.5	27	0.616788
ATXN10_IPI:IPI00001636.1	ATXN10	ATXN10	1	1	26 / 411	0.0632603	1.7	4	0.107543
IMPDH2_IPI:IPI00291510.3	IMPDH2	IMPDH2	1	1	83 / 411	0.201946	3.4	29	0.686618
C16orf14_IPI:IPI00042604.3	C16ORF14	Invalid identifier / gene not available	1	1		0			0
LARS_IPI:IPI00103994.4	LARS	LARS	1	1	131 / 411	0.318735	7.3	62	2.32676
TOR1AIP1_IPI:IPI00792065.3	TOR1AIP1	TOR1AIP1	1	1	21 / 411	0.0510949	1.6	3	0.0817518
SF3B3_IPI:IPI00179138.3	SF3B3	SF3B3	1	1	173 / 411	0.420925	12.9	224	5.42993
BUB3_IPI:IPI00013468.1	BUB3	BUB3	1	1	112 / 411	0.272506	3.3	14	0.89927
CDS2_IPI:IPI00032150.3	CDS2	CDS2	1	1	1 / 411	0.00243309	1	1	0.00243309
AURKB_IPI:IPI00176642.3	AURKB	AURKB	1	1	29 / 411	0.0705596	4.3	18	0.303406
SFRS4_IPI:IPI00000015.2	SFRS4	Invalid identifier / gene not available	1	1		0			0
TF_IPI:IPI00022463.1	TF	TF	1	1	7 / 411	0.0170316	4.3	13	0.073236
ASPH_IPI:IPI00294834.6	ASPH	ASPH	1	1	14 / 411	0.0340633	1.9	4	0.0647202
DDX56_IPI:IPI00302281.1	DDX56	DDX56	1	1	40 / 411	0.0973236	1.9	7	0.184915
ATP5C1_IPI:IPI00395769.2	ATP5C1	ATP5C1	1	1	68 / 411	0.16545	3.2	20	0.52944
CFL1_IPI:IPI00012011.6	CFL1	CFL1	1	1	196 / 411	0.476886	4.2	30	2.00292
GARS_IPI:IPI00783097.3	GARS	GARS	1	1	50 / 411	0.121655	3.1	21	0.377129
LOC389842_IPI:IPI00399212.3	LOC389842	Invalid identifier / gene not available	1	1		0			0
PSMD14_IPI:IPI00024821.1	PSMD14	PSMD14	1	1	83 / 411	0.201946	2.4	10	0.484672
SRPK1_IPI:IPI00290439.2	SRPK1	SRPK1	1	1	52 / 411	0.126521	3.6	11	0.455474
ELAVL1_IPI:IPI00301936.4	ELAVL1	ELAVL1	1	1	101 / 411	0.245742	4.4	19	1.08127
RBM34_IPI:IPI00181617.4	RBM34	RBM34	1	1	32 / 411	0.0778589	2.9	13	0.225791
RSL1D1_IPI:IPI00008708.5	RSL1D1	RSL1D1	1	1	98 / 411	0.238443	5.7	24	1.35912
PYCRL_IPI:IPI00604402.2	PYCRL	PYCRL	1	1	7 / 411	0.0170316	1	1	0.0170316
ALDH2_IPI:IPI00006663.1	ALDH2	ALDH2	1	1	18 / 411	0.0437956	3	13	0.131387
SLC30A5_IPI:IPI00031593.2	SLC30A5	SLC30A5	1	1	0 / 411	0	0	0	0
HSDL1_IPI:IPI00171459.3	HSDL1	HSDL1	1	1	2 / 411	0.00486618	1	1	0.00486618
FAM105A_IPI:IPI00445656.1	FAM105A	FAM105A	1	1	0 / 411	0	0	0	0
ALB_IPI:IPI00216773.4	ALB	ALB	1	1	167 / 411	0.406326	9.9	93	4.02263
RPS15AP25_IPI:IPI00156232.1	RPS15AP25	Invalid identifier / gene not available	1	1		0			0
S100A9_IPI:IPI00027462.1	S100A9	S100A9	1	1	60 / 411	0.145985	3.9	13	0.569343
MRPS23_IPI:IPI00032881.2	MRPS23	MRPS23	1	1	21 / 411	0.0510949	1.7	3	0.0868613
FAR1_IPI:IPI00478838.3	FAR1	FAR1	1	1	14 / 411	0.0340633	1.4	4	0.0476886
SSBP1_IPI:IPI00029744.1	SSBP1	SSBP1	1	1	78 / 411	0.189781	2.6	14	0.493431
POLR2B_IPI:IPI00027808.1	POLR2B	POLR2B	1	1	58 / 411	0.141119	6.5	65	0.917275
SMC3_IPI:IPI00219420.3	SMC3	SMC3	1	1	73 / 411	0.177616	6.6	51	1.17226
PDIA6_IPI:IPI00299571.5	PDIA6	PDIA6	1	1	129 / 411	0.313869	6.7	52	2.10292

## Sheet: SIVsmm Nef
SIVsmm Nef
IPI	User Input	Mapped Gene Symbol	Unique peptide	Total peptide	ExpAP	ExpAP Calculated	Ave SC	Max SC	ExpAP x Ave SC
ACACA_IPI:IPI00011569.2	ACACA	ACACA	71	128	86 / 411	0.209246	139.1	840	29.1061
PRKDC_IPI:IPI00296337.2	PRKDC	PRKDC	54	72	175 / 411	0.425791	22	175	9.3674
IRS4_IPI:IPI00020729.1	IRS4	IRS4	26	35	152 / 411	0.36983	11	105	4.06813
PC_IPI:IPI00299402.1	PC	PC	26	36	106 / 411	0.257908	180.2	1354	46.4749
UBR5_IPI:IPI00026320.1	UBR5	UBR5	26	29	19 / 411	0.0462287	1.6	5	0.0739659
HSPA8_IPI:IPI00003865.1	HSPA8	HSPA8	19	25	396 / 411	0.963504	39.2	332	37.7693
ATXN2L_IPI:IPI00456359.1	ATXN2L	ATXN2L	19	34	127 / 411	0.309002	17.4	113	5.37664
DENND4C_IPI:IPI00100453.7	DENND4C	DENND4C	17	23	13 / 411	0.0316302	1.5	3	0.0474453
USP7_IPI:IPI00003965.5	USP7	USP7	16	19	65 / 411	0.158151	4.1	18	0.648418
NUFIP2_IPI:IPI00002349.2	NUFIP2	NUFIP2	14	19	94 / 411	0.22871	10	50	2.2871
ATAD3B_IPI:IPI00045921.1	ATAD3B	ATAD3B	13	14	59 / 411	0.143552	4.8	42	0.689051
ATP1A1_IPI:IPI00006482.1	ATP1A1	ATP1A4	12	13	45 / 411	0.109489	2.3	15	0.251825
PPP2R1A_IPI:IPI00168184.8	PPP2R1A	PPP2R1A	12	19	132 / 411	0.321168	5.4	43	1.73431
IQGAP2_IPI:IPI00299048.6	IQGAP2	IQGAP2	12	13	23 / 411	0.0559611	2	9	0.111922
CKAP4_IPI:IPI00141318.2	CKAP4	CKAP4	12	14	58 / 411	0.141119	5	24	0.705596
PABPC1_IPI:IPI00008524.1	PABPC1	PABPC1	12	15	172 / 411	0.418491	8.3	104	3.47348
RPS3_IPI:IPI00011253.3	RPS3	RPS3	12	17	266 / 411	0.647202	12	56	7.76642
HSPA5_IPI:IPI00003362.2	HSPA5	HSPA5	11	14	360 / 411	0.875912	16.9	112	14.8029
HNRNPK_IPI:IPI00216049.1	HNRNPK	HNRNPK	11	15	288 / 411	0.70073	16.3	143	11.4219
EXOC4_IPI:IPI00059279.5	EXOC4	EXOC4	11	12	43 / 411	0.104623	1.6	5	0.167397
DHX9_IPI:IPI00844578.1	DHX9	DHX9	11	12	205 / 411	0.498783	15.3	169	7.63139
HSPA1A_IPI:IPI00304925.5	HSPA1A	HSPA1B	11	19	395 / 411	0.961071	42.9	331	41.2299
DBT_IPI:IPI00003944.1	DBT	DBT	11	16	89 / 411	0.216545	30.9	169	6.69124
DDX6_IPI:IPI00030320.4	DDX6	DDX6	10	11	129 / 411	0.313869	6.3	54	1.97737
TUBB2C_IPI:IPI00007752.1	TUBB2C	TUBB4B	10	20	376 / 411	0.914842	29.9	310	27.3538
ATP5A1_IPI:IPI00440493.2	ATP5A1	ATP5A1	10	12	210 / 411	0.510949	11	83	5.62044
MCM3_IPI:IPI00013214.2	MCM3	MCM3	10	11	120 / 411	0.291971	6.6	63	1.92701
IMMT_IPI:IPI00009960.6	IMMT	IMMT	10	10	44 / 411	0.107056	5.4	72	0.578102
KIAA1967_IPI:IPI00182757.1	KIAA1967	CCAR2	9	11	118 / 411	0.287105	6.8	72	1.95231
PPP2R2A_IPI:IPI00332511.5	PPP2R2A	PPP2R2A	9	16	93 / 411	0.226277	3.2	12	0.724088
TUBA4A_IPI:IPI00007750.1	TUBA4A	TUBA4A	9	20	377 / 411	0.917275	28.6	242	26.2341
HNRNPM_IPI:IPI00171903.2	HNRNPM	HNRNPM	9	9	220 / 411	0.53528	15.9	149	8.51095
SLC25A5_IPI:IPI00007188.5	SLC25A5	SLC25A5	9	14	223 / 411	0.542579	7.1	58	3.85231
DDX5_IPI:IPI00017617.1	DDX5	DDX5	9	9	247 / 411	0.600973	8.7	86	5.22847
HNRNPU_IPI:IPI00479217.1	HNRNPU	HNRNPU	8	11	280 / 411	0.681265	15.8	256	10.764
ATP2A2_IPI:IPI00177817.4	ATP2A2	ATP2A2	8	9	92 / 411	0.223844	4.3	35	0.96253
NCL_IPI:IPI00444262.3	NCL	NCL	8	11	261 / 411	0.635036	16.6	99	10.5416
NCL_IPI:IPI00183526.6	NCL	NCL	8	12	261 / 411	0.635036	16.6	99	10.5416
EXOC2_IPI:IPI00783559.1	EXOC2	EXOC2	8	9	4 / 411	0.00973236	1	1	0.00973236
TMPO_IPI:IPI00030131.3	TMPO	TMPO	8	11	127 / 411	0.309002	13.6	78	4.20243
LRPPRC_IPI:IPI00783271.1	LRPPRC	LRPPRC	8	9	130 / 411	0.316302	15.5	112	4.90268
HSPA9_IPI:IPI00007765.5	HSPA9	HSPA9	8	8	307 / 411	0.746959	19	160	14.1922
DDX3X_IPI:IPI00215637.5	DDX3X	DDX3X	8	10	212 / 411	0.515815	10.5	87	5.41606
TUFM_IPI:IPI00027107.5	TUFM	TUFM	8	11	139 / 411	0.3382	8.6	53	2.90852
RPL6_IPI:IPI00329389.8	RPL6	RPL6	8	9	172 / 411	0.418491	11.5	249	4.81265
IQGAP1_IPI:IPI00009342.1	IQGAP1	IQGAP1	8	8	95 / 411	0.231144	5.8	55	1.34063
HSPD1_IPI:IPI00784154.1	HSPD1	HSPD1	7	8	231 / 411	0.562044	17.9	165	10.0606
UBR4_IPI:IPI00640981.3	UBR4	UBR4	7	8	36 / 411	0.0875912	15.2	76	1.33139
SERBP1_IPI:IPI00410693.3	SERBP1	SERBP1	7	10	175 / 411	0.425791	12	107	5.10949
CLPB_IPI:IPI00006615.3	CLPB	CLPB	7	10	30 / 411	0.0729927	1.4	5	0.10219
PTPLAD1_IPI:IPI00008998.3	PTPLAD1	PTPLAD1	7	9	55 / 411	0.13382	2.5	17	0.33455
NSUN2_IPI:IPI00306369.3	NSUN2	NSUN2	7	9	78 / 411	0.189781	3.6	19	0.683212
RPS4X_IPI:IPI00217030.1	RPS4X	RPS4X	7	11	225 / 411	0.547445	9.7	58	5.31022
HSPA1L_IPI:IPI00301277.1	HSPA1L	HSPA1L	7	12	389 / 411	0.946472	22.6	189	21.3903
RPN1_IPI:IPI00025874.2	RPN1	RPN1	7	7	91 / 411	0.221411	3.9	36	0.863504
PFKP_IPI:IPI00009790.1	PFKP	PFKP	7	8	75 / 411	0.182482	4.2	26	0.766423
SLC25A3_IPI:IPI00022202.3	SLC25A3	SLC25A3	7	12	130 / 411	0.316302	4.3	49	1.3601
PABPC4_IPI:IPI00012726.4	PABPC4	PABPC4	7	8	142 / 411	0.345499	6.7	72	2.31484
MYBBP1A_IPI:IPI00005024.3	MYBBP1A	MYBBP1A	7	8	112 / 411	0.272506	8.6	51	2.34355
PKM2_IPI:IPI00220644.8	PKM2	PKM	7	9	249 / 411	0.605839	17.7	181	10.7234
ILF2_IPI:IPI00005198.2	ILF2	ILF2	6	10	152 / 411	0.36983	5.5	53	2.03406
KPNA2_IPI:IPI00002214.1	KPNA2	KPNA2	6	8	162 / 411	0.394161	4.7	36	1.85255
UBR4_IPI:IPI00180305.7	UBR4	UBR4	6	6	36 / 411	0.0875912	15.2	76	1.33139
PHB_IPI:IPI00017334.1	PHB	PHB	6	6	85 / 411	0.206813	3.9	34	0.806569
POLDIP3_IPI:IPI00440688.4	POLDIP3	POLDIP3	6	9	79 / 411	0.192214	6.2	27	1.19173
TRIM28_IPI:IPI00438229.2	TRIM28	TRIM28	6	9	177 / 411	0.430657	12.8	67	5.51241
CAD_IPI:IPI00301263.2	CAD	CAD	6	6	147 / 411	0.357664	11.3	88	4.04161
THRAP3_IPI:IPI00104050.3	THRAP3	THRAP3	6	6	178 / 411	0.43309	17.7	176	7.66569
DDX17_IPI:IPI00023785.7	DDX17	DDX17	6	6	238 / 411	0.579075	8.4	80	4.86423
EMD_IPI:IPI00032003.1	EMD	EMD	6	7	82 / 411	0.199513	3.7	26	0.7382
RPS19_IPI:IPI00215780.5	RPS19	RPS19	6	6	181 / 411	0.440389	6.6	58	2.90657
PRPF40A_IPI:IPI00337385.3	PRPF40A	PRPF40A	6	7	76 / 411	0.184915	5.9	30	1.091
RPS3A_IPI:IPI00419880.6	RPS3A	RPS3A	6	6	203 / 411	0.493917	9	51	4.44526
RPS18_IPI:IPI00013296.3	RPS18	RPS18	6	7	229 / 411	0.557178	5.8	40	3.23163
VDAC2_IPI:IPI00024145.2	VDAC2	VDAC2	6	7	58 / 411	0.141119	8.1	51	1.14307
EPRS_IPI:IPI00013452.9	EPRS	EPRS	6	6	157 / 411	0.381995	11.5	68	4.39294
HIST1H1C_IPI:IPI00217465.5	HIST1H1C	HIST1H1C	6	9	301 / 411	0.73236	10.4	76	7.61655
RPS9_IPI:IPI00221088.5	RPS9	RPS9	6	7	170 / 411	0.413625	6	35	2.48175
YBX1_IPI:IPI00031812.3	YBX1	YBX1	5	8	233 / 411	0.56691	7.2	101	4.08175
CSDA_IPI:IPI00031801.4	CSDA	Invalid identifier / gene not available	5	5		0			0
PHB2_IPI:IPI00027252.6	PHB2	PHB2	5	6	95 / 411	0.231144	5.9	47	1.36375
SYNCRIP_IPI:IPI00018140.3	SYNCRIP	SYNCRIP	5	6	197 / 411	0.479319	6.9	97	3.3073
G3BP1_IPI:IPI00012442.1	G3BP1	G3BP1	5	7	141 / 411	0.343066	6.8	84	2.33285
DNAJA2_IPI:IPI00032406.1	DNAJA2	DNAJA2	5	7	90 / 411	0.218978	3.1	9	0.678832
YME1L1_IPI:IPI00045946.4	YME1L1	YME1L1	5	5	8 / 411	0.0194647	1.1	2	0.0214112
TUBB_IPI:IPI00011654.2	TUBB	TUBB	5	11	382 / 411	0.92944	37.5	338	34.854
VDAC3_IPI:IPI00031804.1	VDAC3	VDAC3	5	6	46 / 411	0.111922	3.9	13	0.436496
RPLP0_IPI:IPI00008530.1	RPLP0	RPLP0	5	5	206 / 411	0.501217	7.1	47	3.55864
CCT2_IPI:IPI00297779.7	CCT2	CCT2	5	5	180 / 411	0.437956	22.3	242	9.76642
ILF3_IPI:IPI00219330.2	ILF3	ILF3	5	6	158 / 411	0.384428	9.4	99	3.61363
PPP2CA_IPI:IPI00008380.1	PPP2CA	PPP2CA	5	11	84 / 411	0.20438	2.2	9	0.449635
MCCC2_IPI:IPI00784044.1	MCCC2	MCCC2	5	5	93 / 411	0.226277	41.7	391	9.43577
RPL4_IPI:IPI00003918.6	RPL4	RPL4	5	6	197 / 411	0.479319	9.6	81	4.60146
EIF3A_IPI:IPI00029012.1	EIF3A	EIF3A	5	5	111 / 411	0.270073	7.5	56	2.02555
DNAJA1_IPI:IPI00012535.1	DNAJA1	DNAJA1	5	7	115 / 411	0.279805	3.6	15	1.0073
AP2A2_IPI:IPI00016621.7	AP2A2	AP2A2	5	5	21 / 411	0.0510949	2	10	0.10219
HUWE1_IPI:IPI00179298.5	HUWE1	HUWE1	5	5	74 / 411	0.180049	11.1	85	1.99854
TCP1_IPI:IPI00290566.1	TCP1	TCP1	5	5	184 / 411	0.447689	18.8	148	8.41655
SRRM2_IPI:IPI00782992.3	SRRM2	SRRM2	5	5	141 / 411	0.343066	24.3	284	8.3365
HNRNPR_IPI:IPI00012074.3	HNRNPR	HNRNPR	5	5	188 / 411	0.457421	7.7	173	3.52214
RPL7_IPI:IPI00030179.3	RPL7	RPL7	5	5	175 / 411	0.425791	7.3	66	3.10827
ATAD3A_IPI:IPI00295992.4	ATAD3A	ATAD3A	5	7	87 / 411	0.211679	5.9	75	1.24891
RPS2_IPI:IPI00013485.3	RPS2	RPS2	5	6	210 / 411	0.510949	7.3	52	3.72993
AP2A1_IPI:IPI00256684.1	AP2A1	AP2A1	5	5	24 / 411	0.0583942	2.4	14	0.140146
PGAM5_IPI:IPI00063242.5	PGAM5	PGAM5	5	5	73 / 411	0.177616	5.2	29	0.923601
USP9X_IPI:IPI00003964.4	USP9X	USP9X	5	5	66 / 411	0.160584	3.3	21	0.529927
PSMC5_IPI:IPI00023919.4	PSMC5	PSMC5	5	5	116 / 411	0.282238	6.3	57	1.7781
VIM_IPI:IPI00418471.6	VIM	VIM	5	5	257 / 411	0.625304	39.5	754	24.6995
HSP90AA1_IPI:IPI00382470.3	HSP90AA1	HSP90AA1	4	4	272 / 411	0.6618	30	327	19.854
MYO1C_IPI:IPI00010418.5	MYO1C	MYO1C	4	4	66 / 411	0.160584	10.7	69	1.71825
SLC25A13_IPI:IPI00007084.3	SLC25A13	SLC25A13	4	4	50 / 411	0.121655	3.4	19	0.413625
ATP1A2_IPI:IPI00003021.1	ATP1A2	ATP1A2	4	5	94 / 411	0.22871	3.4	42	0.777616
TIMM50_IPI:IPI00418497.1	TIMM50	TIMM50	4	5	124 / 411	0.301703	4.1	45	1.23698
TUBA1C_IPI:IPI00166768.3	TUBA1C	TUBA1C	4	13	389 / 411	0.946472	37	281	35.0195
MARCKSL1_IPI:IPI00641181.5	MARCKSL1	MARCKSL1	4	4	52 / 411	0.126521	2.2	9	0.278345
MCCC1_IPI:IPI00024580.4	MCCC1	MCCC1	4	4	88 / 411	0.214112	44.2	272	9.46375
RPS14_IPI:IPI00026271.5	RPS14	RPS14	4	7	259 / 411	0.63017	4.6	33	2.89878
RPN2_IPI:IPI00028635.4	RPN2	RPN2	4	5	82 / 411	0.199513	2.9	29	0.578589
GLUD1_IPI:IPI00016801.1	GLUD1	GLUD1	4	4	90 / 411	0.218978	4.2	27	0.919708
HNRNPF_IPI:IPI00003881.5	HNRNPF	HNRNPF	4	7	243 / 411	0.591241	8.1	58	4.78905
AIFM1_IPI:IPI00000690.1	AIFM1	AIFM1	4	5	101 / 411	0.245742	7.8	92	1.91679
NPM1_IPI:IPI00220740.1	NPM1	NPM1	4	6	252 / 411	0.613139	16.4	172	10.0555
ATP5B_IPI:IPI00303476.1	ATP5B	ATP5B	4	4	211 / 411	0.513382	10	106	5.13382
AKAP8L_IPI:IPI00297455.5	AKAP8L	AKAP8L	4	4	34 / 411	0.0827251	1.6	5	0.13236
DPM1_IPI:IPI00022018.1	DPM1	DPM1	4	4	28 / 411	0.0681265	1.8	8	0.122628
EXOC3_IPI:IPI00157734.2	EXOC3	EXOC3	4	6	5 / 411	0.0121655	1.4	2	0.0170316
SFPQ_IPI:IPI00010740.1	SFPQ	SFPQ	4	5	201 / 411	0.489051	16.7	336	8.16715
ACTB_IPI:IPI00021439.1	ACTB	ACTB	4	8	363 / 411	0.883212	36.4	716	32.1489
HNRNPA3_IPI:IPI00419373.1	HNRNPA3	HNRNPA3	4	4	183 / 411	0.445255	4.4	43	1.95912
RPL8_IPI:IPI00012772.8	RPL8	RPL8	4	5	157 / 411	0.381995	6	42	2.29197
SLC25A11_IPI:IPI00219729.3	SLC25A11	SLC25A11	4	4	55 / 411	0.13382	3.1	18	0.414842
C22orf28_IPI:IPI00550689.3	C22ORF28	Invalid identifier / gene not available	4	4		0			0
RPL18_IPI:IPI00215719.6	RPL18	RPL18	4	5	191 / 411	0.46472	5.3	64	2.46302
RBM39_IPI:IPI00163505.2	RBM39	RBM39	4	5	163 / 411	0.396594	11.1	85	4.40219
SLC25A1_IPI:IPI00294159.3	SLC25A1	SLC25A1	4	4	42 / 411	0.10219	3.4	14	0.347445
RPS6_IPI:IPI00021840.1	RPS6	RPS6	4	6	208 / 411	0.506083	6.2	63	3.13771
RPS25_IPI:IPI00012750.3	RPS25	RPS25	4	5	196 / 411	0.476886	4.4	20	2.0983
RPS8_IPI:IPI00216587.9	RPS8	RPS8	4	5	228 / 411	0.554745	7.4	51	4.10511
WDR6_IPI:IPI00013953.1	WDR6	WDR6	4	4	11 / 411	0.026764	4.2	16	0.112409
EIF4A1_IPI:IPI00025491.1	EIF4A1	EIF4A1	4	4	190 / 411	0.462287	9.2	87	4.25304
MAP7_IPI:IPI00020771.2	MAP7	MAP7	4	4	42 / 411	0.10219	2.6	10	0.265693
COPA_IPI:IPI00295857.7	COPA	COPA	4	5	86 / 411	0.209246	4.8	58	1.00438
PRDX1_IPI:IPI00000874.1	PRDX1	PRDX1	4	5	253 / 411	0.615572	7.9	45	4.86302
RPS16_IPI:IPI00221092.8	RPS16	RPS16	4	5	211 / 411	0.513382	5.9	42	3.02895
DARS_IPI:IPI00216951.2	DARS	DARS	4	4	121 / 411	0.294404	5	35	1.47202
BCLAF1_IPI:IPI00006079.1	BCLAF1	BCLAF1	4	4	171 / 411	0.416058	15.6	106	6.49051
SMC2_IPI:IPI00007927.4	SMC2	SMC2	4	4	82 / 411	0.199513	5.9	33	1.17713
DDB1_IPI:IPI00293464.5	DDB1	DDB1	4	4	103 / 411	0.250608	4.8	52	1.20292
DDX21_IPI:IPI00015953.3	DDX21	DDX21	4	4	179 / 411	0.435523	13.1	75	5.70535
RPL26L1_IPI:IPI00007144.1	RPL26L1	RPL26L1	4	5	138 / 411	0.335766	4.3	19	1.4438
LGALS3BP_IPI:IPI00023673.1	LGALS3BP	LGALS3BP	4	4	25 / 411	0.0608273	13.7	74	0.833333
FARSA_IPI:IPI00031820.3	FARSA	FARSA	4	4	60 / 411	0.145985	2.9	11	0.423358
GPSN2_IPI:IPI00100656.3	GPSN2	Invalid identifier / gene not available	4	4		0			0
YWHAE_IPI:IPI00000816.1	YWHAE	YWHAE	4	4	186 / 411	0.452555	9.4	90	4.25401
RPS11_IPI:IPI00025091.3	RPS11	RPS11	4	4	151 / 411	0.367397	4.3	22	1.57981
HAX1_IPI:IPI00010440.5	HAX1	HAX1	3	4	29 / 411	0.0705596	1.7	7	0.119951
RPLP2_IPI:IPI00008529.1	RPLP2	RPLP2	3	3	215 / 411	0.523114	6.1	117	3.191
RPS17_IPI:IPI00221093.7	RPS17	RPS17L	3	6	177 / 411	0.430657	4.7	42	2.02409
HNRNPH1_IPI:IPI00013881.6	HNRNPH1	HNRNPH1	3	3	263 / 411	0.639903	13.7	201	8.76667
EFTUD2_IPI:IPI00003519.1	EFTUD2	EFTUD2	3	3	162 / 411	0.394161	10.8	82	4.25693
C1QBP_IPI:IPI00014230.1	C1QBP	C1QBP	3	5	223 / 411	0.542579	11.4	381	6.1854
RPS7_IPI:IPI00013415.1	RPS7	RPS7	3	4	200 / 411	0.486618	5.9	27	2.87105
EEF1A1_IPI:IPI00025447.8	EEF1A1	EEF1A1	3	5	350 / 411	0.851582	21.9	230	18.6496
MARCKS_IPI:IPI00219301.7	MARCKS	MARCKS	3	3	95 / 411	0.231144	2.8	14	0.647202
CHCHD3_IPI:IPI00015833.1	CHCHD3	CHCHD3	3	3	16 / 411	0.0389294	4.6	31	0.179075
RPL22_IPI:IPI00219153.4	RPL22	RPL22	3	3	192 / 411	0.467153	3.3	26	1.54161
COPB2_IPI:IPI00220219.6	COPB2	COPB2	3	3	79 / 411	0.192214	3.6	23	0.691971
EIF3L_IPI:IPI00465233.1	EIF3L	EIF3L	3	3	92 / 411	0.223844	4.7	23	1.05207
LRRC59_IPI:IPI00396321.1	LRRC59	LRRC59	3	3	80 / 411	0.194647	2.4	6	0.467153
EIF2S2_IPI:IPI00021728.3	EIF2S2	EIF2S2	3	3	71 / 411	0.172749	1.9	7	0.328224
RPL5_IPI:IPI00000494.6	RPL5	RPL5	3	4	156 / 411	0.379562	6.8	55	2.58102
COPB1_IPI:IPI00295851.4	COPB1	COPB1	3	4	92 / 411	0.223844	3.1	18	0.693917
CSE1L_IPI:IPI00022744.5	CSE1L	CSE1L	3	3	126 / 411	0.306569	7.1	54	2.17664
SF3B1_IPI:IPI00026089.3	SF3B1	SF3B1	3	3	171 / 411	0.416058	17.8	142	7.40584
EIF4G1_IPI:IPI00386533.3	EIF4G1	EIF4G1	3	3	102 / 411	0.248175	13.3	78	3.30073
HSPA7_IPI:IPI00011134.2	HSPA7	Invalid identifier / gene not available	3	4		0			0
CTPS_IPI:IPI00290142.5	CTPS	Invalid identifier / gene not available	3	3		0			0
PYCRL_IPI:IPI00604402.2	PYCRL	PYCRL	3	5	7 / 411	0.0170316	1	1	0.0170316
ERLIN1_IPI:IPI00007940.6	ERLIN1	ERLIN1	3	3	29 / 411	0.0705596	1.8	9	0.127007
G3BP2_IPI:IPI00009057.2	G3BP2	G3BP2	3	3	59 / 411	0.143552	2.9	24	0.416302
MCM7_IPI:IPI00219740.3	MCM7	MCM7	3	4	123 / 411	0.29927	7.2	59	2.15474
MRPL37_IPI:IPI00162330.3	MRPL37	MRPL37	3	3	21 / 411	0.0510949	1.9	7	0.0970803
IPO9_IPI:IPI00185146.5	IPO9	IPO9	3	3	26 / 411	0.0632603	1.8	8	0.113869
RPL10A_IPI:IPI00412579.6	RPL10A	RPL10A	3	4	117 / 411	0.284672	6.8	39	1.93577
EIF3D_IPI:IPI00006181.1	EIF3D	EIF3D	3	3	81 / 411	0.19708	3	22	0.591241
LSM14A_IPI:IPI00410590.5	LSM14A	LSM14A	3	4	113 / 411	0.274939	6.6	30	1.8146
RPL15_IPI:IPI00470528.5	RPL15	RPL15	3	4	149 / 411	0.36253	6.6	30	2.3927
RRP12_IPI:IPI00101186.6	RRP12	RRP12	3	4	61 / 411	0.148418	3.8	20	0.56399
ANXA1_IPI:IPI00218918.5	ANXA1	ANXA1	3	3	41 / 411	0.0997567	2.8	11	0.279319
XRN2_IPI:IPI00100151.4	XRN2	XRN2	3	3	97 / 411	0.23601	3.5	20	0.826034
THOC4_IPI:IPI00328840.9	THOC4	Invalid identifier / gene not available	3	3		0			0
EIF3G_IPI:IPI00290460.3	EIF3G	EIF3G	3	3	109 / 411	0.265207	4.3	38	1.14039
SLC1A5_IPI:IPI00019472.4	SLC1A5	SLC1A5	3	3	70 / 411	0.170316	2.9	13	0.493917
SUPT5H_IPI:IPI00298058.1	SUPT5H	SUPT5H	3	4	50 / 411	0.121655	5.1	47	0.620438
LBR_IPI:IPI00292135.1	LBR	LBR	3	4	54 / 411	0.131387	5.7	24	0.748905
GTF2I_IPI:IPI00054042.1	GTF2I	GTF2I	3	3	141 / 411	0.343066	14	71	4.80292
CAND1_IPI:IPI00100160.3	CAND1	CAND1	3	3	88 / 411	0.214112	6.5	61	1.39173
RPL24_IPI:IPI00306332.4	RPL24	RPL24	3	3	195 / 411	0.474453	4.1	22	1.94526
RPL13P12_IPI:IPI00397611.2	RPL13P12	Invalid identifier / gene not available	3	4		0			0
RPL13_IPI:IPI00465361.4	RPL13	RPL13	3	5	218 / 411	0.530414	5.4	49	2.86423
IQCB1_IPI:IPI00014255.1	IQCB1	IQCB1	3	3	2 / 411	0.00486618	3	5	0.0145985
UBC_IPI:IPI00179330.6	UBC	UBC	3	8	233 / 411	0.56691	6.5	90	3.68491
RPL3_IPI:IPI00550021.4	RPL3	RPL3	3	3	163 / 411	0.396594	10.5	142	4.16423
DDX20_IPI:IPI00005904.3	DDX20	DDX20	3	3	40 / 411	0.0973236	2.6	15	0.253041
IPI:IPI00176692.7_IPI:IPI00176692.7	IPI:IPI00176692	Invalid identifier / gene not available	3	4		0			0
ALDH3A2_IPI:IPI00333619.4	ALDH3A2	ALDH3A2	3	3	29 / 411	0.0705596	2.3	12	0.162287
TUBB1_IPI:IPI00006510.1	TUBB1	TUBB1	3	6	291 / 411	0.708029	6.8	62	4.8146
ATP2A1_IPI:IPI00024804.3	ATP2A1	ATP2A1	3	3	59 / 411	0.143552	2.4	16	0.344526
ATP5C1_IPI:IPI00395769.2	ATP5C1	ATP5C1	3	3	68 / 411	0.16545	3.2	20	0.52944
EIF3B_IPI:IPI00396370.6	EIF3B	EIF3B	3	3	108 / 411	0.262774	5.4	42	1.41898
COPG2_IPI:IPI00002557.1	COPG2	COPG2	3	3	67 / 411	0.163017	15.4	92	2.51046
CSDE1_IPI:IPI00470891.2	CSDE1	CSDE1	3	3	67 / 411	0.163017	5.9	31	0.9618
PDK3_IPI:IPI00014849.3	PDK3	PDK3	3	4	6 / 411	0.0145985	1.2	2	0.0175182
DDX1_IPI:IPI00293655.3	DDX1	DDX1	3	3	125 / 411	0.304136	5.7	34	1.73358
SNRPD2_IPI:IPI00017963.1	SNRPD2	SNRPD2	3	3	173 / 411	0.420925	4.9	40	2.06253
EXOC1_IPI:IPI00019427.4	EXOC1	EXOC1	3	3	5 / 411	0.0121655	1	1	0.0121655
HADHA_IPI:IPI00031522.2	HADHA	HADHA	3	3	72 / 411	0.175182	6.8	39	1.19124
GCN1L1_IPI:IPI00001159.1	GCN1L1	GCN1L1	3	3	104 / 411	0.253041	11.4	105	2.88467
SMC4_IPI:IPI00328298.6	SMC4	SMC4	3	3	90 / 411	0.218978	5.2	26	1.13869
CNOT1_IPI:IPI00166010.6	CNOT1	CNOT1	3	3	44 / 411	0.107056	3.5	37	0.374696
IPI:IPI00719051.3_IPI:IPI00719051.3	IPI:IPI00719051	Invalid identifier / gene not available	3	3		0			0
RPS13_IPI:IPI00221089.5	RPS13	RPS13	3	3	158 / 411	0.384428	4.5	17	1.72993
NOP14_IPI:IPI00022613.4	NOP14	NOP14	3	3	12 / 411	0.0291971	1.8	5	0.0525547
IQGAP3_IPI:IPI00328905.6	IQGAP3	IQGAP3	3	3	13 / 411	0.0316302	1.4	5	0.0442822
LEMD2_IPI:IPI00168336.1	LEMD2	LEMD2	3	3	5 / 411	0.0121655	2.4	7	0.0291971
RPL35A_IPI:IPI00029731.8	RPL35A	RPL35A	3	3	108 / 411	0.262774	3.8	23	0.99854
MDN1_IPI:IPI00167941.1	MDN1	MDN1	3	3	27 / 411	0.0656934	2.4	8	0.157664
RPS7P4_IPI:IPI00008293.4	RPS7P4	Invalid identifier / gene not available	3	3		0			0
MRPS27_IPI:IPI00022002.6	MRPS27	MRPS27	2	2	31 / 411	0.0754258	2.6	9	0.196107
YWHAQ_IPI:IPI00018146.1	YWHAQ	YWHAQ	2	2	153 / 411	0.372263	4.3	91	1.60073
XRCC6_IPI:IPI00644712.4	XRCC6	XRCC6	2	2	176 / 411	0.428224	9	71	3.85401
U2AF2_IPI:IPI00031556.7	U2AF2	U2AF2	2	3	124 / 411	0.301703	4.2	21	1.26715
FKBP8_IPI:IPI00328161.8	FKBP8	FKBP8	2	2	21 / 411	0.0510949	1.6	4	0.0817518
FAM98A_IPI:IPI00174442.2	FAM98A	FAM98A	2	2	43 / 411	0.104623	2.3	17	0.240633
HSP90AB1_IPI:IPI00414676.6	HSP90AB1	HSP90AB1	2	2	277 / 411	0.673966	30.7	278	20.6908
TAF15_IPI:IPI00020194.1	TAF15	TAF15	2	2	163 / 411	0.396594	4.9	35	1.94331
PCNA_IPI:IPI00021700.3	PCNA	PCNA	2	3	97 / 411	0.23601	4.8	23	1.13285
AP2B1_IPI:IPI00784156.1	AP2B1	AP2B1	2	2	54 / 411	0.131387	2.5	20	0.328467
FAR1_IPI:IPI00386139.1	FAR1	FAR1	2	2	14 / 411	0.0340633	1.4	4	0.0476886
ERLIN2_IPI:IPI00026942.5	ERLIN2	ERLIN2	2	2	45 / 411	0.109489	2.2	23	0.240876
EFHA1_IPI:IPI00640276.1	EFHA1	Invalid identifier / gene not available	2	3		0			0
TF_IPI:IPI00022463.1	TF	TF	2	2	7 / 411	0.0170316	4.3	13	0.073236
RPL7A_IPI:IPI00299573.1	RPL7A	RPL7A	2	2	197 / 411	0.479319	6.8	48	3.25937
SLC25A6_IPI:IPI00291467.7	SLC25A6	SLC25A6	2	3	201 / 411	0.489051	7	119	3.42336
CROP_IPI:IPI00107745.3	CROP	Invalid identifier / gene not available	2	2		0			0
OAT_IPI:IPI00022334.1	OAT	OAT	2	2	95 / 411	0.231144	4.4	44	1.01703
VARS_IPI:IPI00000873.3	VARS	VARS	2	2	100 / 411	0.243309	7.2	47	1.75182
XPO1_IPI:IPI00298961.3	XPO1	XPO1	2	2	95 / 411	0.231144	4	51	0.924574
ERC1_IPI:IPI00171230.6	ERC1	ERC1	2	2	44 / 411	0.107056	3.3	11	0.353285
LARP1_IPI:IPI00185919.3	LARP1	LARP1	2	2	78 / 411	0.189781	12.1	46	2.29635
POLDIP3_IPI:IPI00429180.1	POLDIP3	POLDIP3	2	2	79 / 411	0.192214	6.2	27	1.19173
NONO_IPI:IPI00304596.3	NONO	NONO	2	2	220 / 411	0.53528	18.8	386	10.0633
SF3B3_IPI:IPI00300371.5	SF3B3	SF3B3	2	2	173 / 411	0.420925	12.9	224	5.42993
SERPINA1_IPI:IPI00305457.5	SERPINA1	SERPINA1	2	2	2 / 411	0.00486618	2	3	0.00973236
RPL19_IPI:IPI00025329.1	RPL19	RPL19	2	3	210 / 411	0.510949	3.8	67	1.94161
AGPS_IPI:IPI00010349.1	AGPS	AGPS	2	2	11 / 411	0.026764	2.3	9	0.0615572
NMT2_IPI:IPI00030223.3	NMT2	NMT2	2	2	15 / 411	0.0364964	1.3	2	0.0474453
UBAP2L_IPI:IPI00029019.6	UBAP2L	UBAP2L	2	2	129 / 411	0.313869	10.4	41	3.26423
RPS10_IPI:IPI00008438.1	RPS10	RPS10	2	2	177 / 411	0.430657	5.4	32	2.32555
HSP90B1_IPI:IPI00027230.3	HSP90B1	HSP90B1	2	2	186 / 411	0.452555	13.1	96	5.92847
GAPDH_IPI:IPI00219018.7	GAPDH	GAPDH	2	2	248 / 411	0.603406	13	97	7.84428
LSM12_IPI:IPI00410324.2	LSM12	LSM12	2	6	80 / 411	0.194647	2.7	13	0.525547
AGK_IPI:IPI00019353.4	AGK	AGK	2	2	16 / 411	0.0389294	1.6	4	0.0622871
SRPRB_IPI:IPI00295098.3	SRPRB	SRPRB	2	2	35 / 411	0.0851582	1.7	5	0.144769
RPL11_IPI:IPI00376798.3	RPL11	RPL11	2	3	209 / 411	0.508516	3.7	20	1.88151
NUDT21_IPI:IPI00646917.1	NUDT21	NUDT21	2	2	119 / 411	0.289538	4.5	20	1.30292
STOML2_IPI:IPI00334190.4	STOML2	STOML2	2	2	32 / 411	0.0778589	3.3	20	0.256934
RPL9_IPI:IPI00031691.1	RPL9	RPL9	2	2	167 / 411	0.406326	5.7	68	2.31606
SSR1_IPI:IPI00301021.3	SSR1	SSR1	2	2	19 / 411	0.0462287	1.5	4	0.0693431
PTCD3_IPI:IPI00783302.1	PTCD3	PTCD3	2	3	30 / 411	0.0729927	2.1	6	0.153285
IPI:IPI00069693.4_IPI:IPI00069693.4	IPI:IPI00069693	Invalid identifier / gene not available	2	3		0			0
IPI:IPI00550731.2_IPI:IPI00550731.2	IPI:IPI00550731	Invalid identifier / gene not available	2	2		0			0
PHGDH_IPI:IPI00011200.5	PHGDH	PHGDH	2	2	152 / 411	0.36983	6.2	40	2.29294
ABCD3_IPI:IPI00002372.1	ABCD3	ABCD3	2	2	40 / 411	0.0973236	4	12	0.389294
TSR1_IPI:IPI00292894.5	TSR1	TSR1	2	2	65 / 411	0.158151	3.1	10	0.490268
APOB_IPI:IPI00022229.1	APOB	APOB	2	2	11 / 411	0.026764	4.1	8	0.109732
SLC16A1_IPI:IPI00024650.1	SLC16A1	SLC16A1	2	3	47 / 411	0.114355	2.4	7	0.274453
IGF2BP1_IPI:IPI00008557.5	IGF2BP1	IGF2BP1	2	2	114 / 411	0.277372	6.5	50	1.80292
SLC25A4_IPI:IPI00022891.3	SLC25A4	SLC25A4	2	2	195 / 411	0.474453	5.1	40	2.41971
HNRNPA1_IPI:IPI00215965.2	HNRNPA1	HNRNPA1	2	2	268 / 411	0.652068	9.2	68	5.99903
RECQL4_IPI:IPI00014925.1	RECQL4	RECQL4	2	2	3 / 411	0.00729927	1	1	0.00729927
INTS6_IPI:IPI00015922.2	INTS6	INTS6	2	2	1 / 411	0.00243309	1	1	0.00243309
TXN_IPI:IPI00216298.6	TXN	TXN	2	2	174 / 411	0.423358	2.6	10	1.10073
DAP3_IPI:IPI00018120.1	DAP3	DAP3	2	2	41 / 411	0.0997567	2.3	10	0.22944
NDUFS3_IPI:IPI00025796.3	NDUFS3	NDUFS3	2	2	19 / 411	0.0462287	2.3	9	0.106326
PRPF8_IPI:IPI00007928.4	PRPF8	PRPF8	2	2	161 / 411	0.391727	15	117	5.87591
SEC63_IPI:IPI00218922.5	SEC63	SEC63	2	2	11 / 411	0.026764	2.1	11	0.0562044
SEC22B_IPI:IPI00006865.3	SEC22B	Invalid identifier / gene not available	2	2		0			0
EWSR1_IPI:IPI00009841.5	EWSR1	EWSR1	2	2	143 / 411	0.347932	20.6	339	7.1674
TRIP13_IPI:IPI00003505.3	TRIP13	TRIP13	2	2	27 / 411	0.0656934	2.2	7	0.144526
PFKL_IPI:IPI00332371.9	PFKL	PFKL	2	2	67 / 411	0.163017	3.4	30	0.554258
CFL1_IPI:IPI00012011.6	CFL1	CFL1	2	3	196 / 411	0.476886	4.2	30	2.00292
SFRS7_IPI:IPI00003377.1	SFRS7	Invalid identifier / gene not available	2	4		0			0
EPDR1_IPI:IPI00259102.2	EPDR1	EPDR1	2	2	0 / 411	0	0	0	0
SRRT_IPI:IPI00220038.1	SRRT	SRRT	2	2	82 / 411	0.199513	6	43	1.19708
ATP5J2_IPI:IPI00219291.5	ATP5J2	ATP5J2	2	2	28 / 411	0.0681265	1.2	3	0.0817518
NACA_IPI:IPI00023748.3	NACA	NACA	2	2	125 / 411	0.304136	2.4	11	0.729927
SEC16A_IPI:IPI00031242.9	SEC16A	SEC16A	2	2	41 / 411	0.0997567	4.1	11	0.409002
LOC442497_IPI:IPI00027493.1	LOC442497	Invalid identifier / gene not available	2	2		0			0
EIF3CL_IPI:IPI00016910.1	EIF3CL	EIF3CL	2	3	109 / 411	0.265207	4.9	26	1.29951
RANP1_IPI:IPI00643041.3	RANP1	Invalid identifier / gene not available	2	2		0			0
EIF3H_IPI:IPI00647650.3	EIF3H	EIF3H	2	2	83 / 411	0.201946	2.7	14	0.545255
ATP5O_IPI:IPI00007611.1	ATP5O	ATP5O	2	2	51 / 411	0.124088	2.8	9	0.347445
CCDC8_IPI:IPI00290526.9	CCDC8	CCDC8	2	2	5 / 411	0.0121655	1.6	4	0.0194647
HNRNPA2B1_IPI:IPI00386854.6	HNRNPA2B1	HNRNPA2B1	2	2	262 / 411	0.63747	11.3	67	7.20341
LTV1_IPI:IPI00153032.1	LTV1	LTV1	2	2	50 / 411	0.121655	2.2	8	0.26764
H1FX_IPI:IPI00021924.1	H1FX	H1FX	2	2	121 / 411	0.294404	3.4	17	1.00097
SNRNP70_IPI:IPI00219483.1	SNRNP70	SNRNP70	2	3	108 / 411	0.262774	5.1	52	1.34015
RPS5_IPI:IPI00008433.4	RPS5	RPS5	2	2	160 / 411	0.389294	4.1	21	1.59611
IGHA1_IPI:IPI00383164.1	IGHA1	Invalid identifier / gene not available	2	2		0			0
SNRPE_IPI:IPI00029266.1	SNRPE	SNRPE	2	2	93 / 411	0.226277	2.2	11	0.49781
ACTA2_IPI:IPI00008603.1	ACTA2	ACTA2	2	2	351 / 411	0.854015	18.6	294	15.8847
COPS3_IPI:IPI00025721.3	COPS3	COPS3	2	2	33 / 411	0.080292	2	5	0.160584
XPOT_IPI:IPI00306290.5	XPOT	XPOT	2	2	21 / 411	0.0510949	2.5	8	0.127737
RUVBL1_IPI:IPI00021187.4	RUVBL1	RUVBL1	2	2	152 / 411	0.36983	12.4	75	4.58589
RARS_IPI:IPI00004860.2	RARS	RARS	2	2	110 / 411	0.26764	7.1	34	1.90024
AP1B1_IPI:IPI00328257.4	AP1B1	AP1B1	2	2	45 / 411	0.109489	1.8	16	0.19708
RPL17_IPI:IPI00413324.6	RPL17	RPL17-C18orf32	2	2	190 / 411	0.462287	4.6	29	2.12652
SNAP23_IPI:IPI00010438.2	SNAP23	SNAP23	2	2	41 / 411	0.0997567	3.5	15	0.349148
NMT1_IPI:IPI00218830.1	NMT1	NMT1	2	2	36 / 411	0.0875912	2.1	8	0.183942
GK_IPI:IPI00027424.3	GK	GK	2	2	6 / 411	0.0145985	1.7	3	0.0248175
QPCTL_IPI:IPI00014877.4	QPCTL	QPCTL	2	2	16 / 411	0.0389294	3.1	12	0.120681
RPL27A_IPI:IPI00456758.4	RPL27A	RPL27A	2	2	198 / 411	0.481752	3.2	19	1.54161
DHX15_IPI:IPI00396435.3	DHX15	DHX15	2	2	168 / 411	0.408759	10.9	172	4.45547
GNB2_IPI:IPI00003348.3	GNB2	GNB2	2	2	63 / 411	0.153285	3.6	21	0.551825
RPL7AP27_IPI:IPI00075558.9	RPL7AP27	Invalid identifier / gene not available	2	2		0			0
PIK3R2_IPI:IPI00011736.3	PIK3R2	PIK3R2	2	3	6 / 411	0.0145985	2.2	7	0.0321168
IPO7_IPI:IPI00007402.3	IPO7	IPO7	2	2	64 / 411	0.155718	3.5	14	0.545012
CAPRIN1_IPI:IPI00783872.2	CAPRIN1	CAPRIN1	2	2	120 / 411	0.291971	4.6	44	1.34307
CLTC_IPI:IPI00024067.4	CLTC	CLTC	2	2	180 / 411	0.437956	17.2	234	7.53285
FAM62B_IPI:IPI00409635.2	FAM62B	Invalid identifier / gene not available	2	2		0			0
RPL31_IPI:IPI00026302.3	RPL31	RPL31	2	5	170 / 411	0.413625	3.2	21	1.3236
RAB18_IPI:IPI00014577.1	RAB18	RAB18	2	2	12 / 411	0.0291971	1.6	4	0.0467153
HIST1H4J_IPI:IPI00453473.6	HIST1H4J	HIST1H4J	2	2	225 / 411	0.547445	13.6	316	7.44526
PRDX4_IPI:IPI00011937.1	PRDX4	PRDX4	2	2	161 / 411	0.391727	2.8	30	1.09684
PRMT5_IPI:IPI00064328.3	PRMT5	PRMT5	2	2	175 / 411	0.425791	156.6	2950	66.6788
BAG2_IPI:IPI00000643.1	BAG2	BAG2	2	2	96 / 411	0.233577	2.9	20	0.677372
RAD50_IPI:IPI00107531.1	RAD50	RAD50	2	2	43 / 411	0.104623	8.4	40	0.878832
SBF1_IPI:IPI00029446.3	SBF1	SBF1	2	2	4 / 411	0.00973236	1.8	4	0.0175182
RPL38_IPI:IPI00215790.6	RPL38	RPL38	2	2	139 / 411	0.3382	9	58	3.0438
BAT2_IPI:IPI00010700.2	BAT2	Invalid identifier / gene not available	2	2		0			0
PLK1_IPI:IPI00021248.1	PLK1	PLK1	2	2	14 / 411	0.0340633	1.9	3	0.0647202
SF3B2_IPI:IPI00221106.5	SF3B2	SF3B2	2	2	134 / 411	0.326034	12.7	83	4.14063
EIF2S3_IPI:IPI00297982.7	EIF2S3	EIF2S3	2	2	91 / 411	0.221411	3.6	13	0.79708
EIF3E_IPI:IPI00013068.1	EIF3E	EIF3E	2	2	96 / 411	0.233577	3.6	30	0.840876
KPNB1_IPI:IPI00001639.2	KPNB1	KPNB1	2	3	161 / 411	0.391727	9.5	62	3.72141
C6orf134_IPI:IPI00026795.4	C6ORF134	Invalid identifier / gene not available	2	2		0			0
MOV10_IPI:IPI00444452.3	MOV10	MOV10	2	2	44 / 411	0.107056	5.3	29	0.567397
BAT2D1_IPI:IPI00083708.3	BAT2D1	Invalid identifier / gene not available	2	2		0			0
EIF3I_IPI:IPI00012795.3	EIF3I	EIF3I	2	2	128 / 411	0.311436	5.8	39	1.80633
MARS_IPI:IPI00008240.2	MARS	MARS	2	2	107 / 411	0.260341	6.3	30	1.64015
C1orf57_IPI:IPI00031570.1	C1ORF57	NTPCR	2	2	37 / 411	0.0900243	2.2	6	0.198054
EXOC7_IPI:IPI00103064.4	EXOC7	EXOC7	2	2	6 / 411	0.0145985	1.2	2	0.0175182
RPL23_IPI:IPI00010153.5	RPL23	RPL23	2	2	243 / 411	0.591241	5.7	48	3.37007
GRAMD1A_IPI:IPI00168347.7	GRAMD1A	GRAMD1A	2	2	9 / 411	0.0218978	2.1	4	0.0459854
RBM14_IPI:IPI00013174.2	RBM14	RBM14-RBM4	2	2	52 / 411	0.126521	2.2	8	0.278345
KIF3A_IPI:IPI00000455.7	KIF3A	KIF3A	2	2	3 / 411	0.00729927	1.3	2	0.00948905
STT3A_IPI:IPI00297492.2	STT3A	STT3A	2	3	23 / 411	0.0559611	1.7	7	0.0951338
ABCC1_IPI:IPI00008338.1	ABCC1	ABCC1	2	2	3 / 411	0.00729927	2	3	0.0145985
SF3B3_IPI:IPI00179138.3	SF3B3	SF3B3	2	2	173 / 411	0.420925	12.9	224	5.42993
FASN_IPI:IPI00026781.2	FASN	FASN	2	2	167 / 411	0.406326	49.4	548	20.0725
EIF3F_IPI:IPI00654777.2	EIF3F	EIF3F	2	2	112 / 411	0.272506	3.5	16	0.953771
MRPS9_IPI:IPI00641924.2	MRPS9	MRPS9	2	2	27 / 411	0.0656934	1.7	4	0.111679
DLD_IPI:IPI00015911.1	DLD	DLD	2	2	84 / 411	0.20438	6.3	38	1.28759
STRBP_IPI:IPI00169430.2	STRBP	STRBP	2	2	69 / 411	0.167883	3.1	15	0.520438
RPL18A_IPI:IPI00026202.1	RPL18A	RPL18A	2	2	113 / 411	0.274939	7	37	1.92457
PARP1_IPI:IPI00449049.5	PARP1	PARP1	2	2	182 / 411	0.442822	11.8	151	5.2253
RFC2_IPI:IPI00017412.1	RFC2	RFC2	2	2	56 / 411	0.136253	2.4	7	0.327007
TUBA1A_IPI:IPI00180675.4	TUBA1A	TUBA1A	1	1	389 / 411	0.946472	34.9	299	33.0319
SERPINA3_IPI:IPI00550991.3	SERPINA3	SERPINA3	1	1	0 / 411	0	0	0	0
DENND4C_IPI:IPI00478744.3	DENND4C	DENND4C	1	1	13 / 411	0.0316302	1.5	3	0.0474453
TMEM165_IPI:IPI00307572.1	TMEM165	TMEM165	1	1	14 / 411	0.0340633	1.4	2	0.0476886
RPL14_IPI:IPI00555744.6	RPL14	RPL14	1	1	156 / 411	0.379562	4.4	33	1.67007
TUBA1C_IPI:IPI00218343.4	TUBA1C	TUBA1C	1	1	389 / 411	0.946472	37	281	35.0195
YWHAZ_IPI:IPI00021263.3	YWHAZ	YWHAZ	1	1	180 / 411	0.437956	6	36	2.62774
SERPINB3_IPI:IPI00022204.2	SERPINB3	SERPINB3	1	1	36 / 411	0.0875912	5.1	43	0.446715
TCEB1_IPI:IPI00300341.5	TCEB1	TCEB1	1	1	46 / 411	0.111922	1.5	4	0.167883
DGAT1_IPI:IPI00015799.2	DGAT1	DGAT1	1	1	0 / 411	0	0	0	0
CBARA1_IPI:IPI00295598.4	CBARA1	Invalid identifier / gene not available	1	1		0			0
RNPS1_IPI:IPI00033561.3	RNPS1	RNPS1	1	1	109 / 411	0.265207	3.6	16	0.954745
IARS_IPI:IPI00644127.2	IARS	IARS	1	1	106 / 411	0.257908	7.4	65	1.90852
RHOT2_IPI:IPI00465059.4	RHOT2	RHOT2	1	1	9 / 411	0.0218978	1.3	2	0.0284672
APOC2_IPI:IPI00021856.3	APOC2	APOC2	1	1	0 / 411	0	0	0	0
TIMM23_IPI:IPI00007309.1	TIMM23	TIMM23	1	1	14 / 411	0.0340633	1.6	6	0.0545012
ACTBL2_IPI:IPI00003269.1	ACTBL2	ACTBL2	1	1	329 / 411	0.800487	9.1	129	7.28443
RER1_IPI:IPI00005728.2	RER1	RER1	1	1	2 / 411	0.00486618	1	1	0.00486618
AKAP8_IPI:IPI00014474.1	AKAP8	AKAP8	1	1	31 / 411	0.0754258	1.5	4	0.113139
LUC7L2_IPI:IPI00006932.4	LUC7L2	C7orf55-LUC7L2	1	1	151 / 411	0.367397	15.8	106	5.80487
CLPTM1_IPI:IPI00396411.4	CLPTM1	CLPTM1	1	1	2 / 411	0.00486618	1	1	0.00486618
STRAP_IPI:IPI00294536.2	STRAP	STRAP	1	1	93 / 411	0.226277	4.5	27	1.01825
LUC7L_IPI:IPI00071318.1	LUC7L	LUC7L	1	1	118 / 411	0.287105	6.5	42	1.86618
RRP1B_IPI:IPI00032374.3	RRP1B	RRP1B	1	1	62 / 411	0.150852	4.5	27	0.678832
C14orf166_IPI:IPI00006980.1	C14ORF166	C14orf166	1	1	92 / 411	0.223844	3.7	15	0.828224
CNP_IPI:IPI00220993.1	CNP	CNP	1	1	26 / 411	0.0632603	1.9	8	0.120195
IPO5_IPI:IPI00793443.1	IPO5	IPO5	1	1	80 / 411	0.194647	4.5	30	0.875912
BRI3BP_IPI:IPI00103599.1	BRI3BP	BRI3BP	1	1	5 / 411	0.0121655	1.2	2	0.0145985
RBM4_IPI:IPI00003704.4	RBM4	RBM4	1	1	33 / 411	0.080292	1.8	7	0.144526
PTDSS1_IPI:IPI00010746.1	PTDSS1	PTDSS1	1	1	5 / 411	0.0121655	1.2	2	0.0145985
HIST1H2AB_IPI:IPI00026272.2	HIST1H2AB	HIST1H2AE	1	1	271 / 411	0.659367	10	217	6.59367
AFG3L2_IPI:IPI00001091.4	AFG3L2	AFG3L2	1	1	21 / 411	0.0510949	3.8	11	0.194161
MYH9_IPI:IPI00019502.3	MYH9	MYH9	1	1	203 / 411	0.493917	32.8	670	16.2005
PSMD3_IPI:IPI00011603.2	PSMD3	PSMD3	1	1	111 / 411	0.270073	6.2	34	1.67445
PKM2_IPI:IPI00479186.7	PKM2	PKM	1	1	249 / 411	0.605839	17.7	181	10.7234
SSBP1_IPI:IPI00029744.1	SSBP1	SSBP1	1	1	78 / 411	0.189781	2.6	14	0.493431
RPS24_IPI:IPI00029750.1	RPS24	RPS24	1	1	179 / 411	0.435523	4.7	36	2.04696
CPSF6_IPI:IPI00012998.2	CPSF6	CPSF6	1	1	137 / 411	0.333333	4.5	21	1.5
LARP4B_IPI:IPI00514141.2	LARP4B	LARP4B	1	1	20 / 411	0.0486618	1.5	3	0.0729927
PPP2R1B_IPI:IPI00294178.2	PPP2R1B	PPP2R1B	1	1	77 / 411	0.187348	2	10	0.374696
RPL29P30_IPI:IPI00052885.7	RPL29P30	Invalid identifier / gene not available	1	1		0			0
LOC348262_IPI:IPI00746221.2	LOC348262	Invalid identifier / gene not available	1	1		0			0
IPI:IPI00384397.1_IPI:IPI00384397.1	IPI:IPI00384397	Invalid identifier / gene not available	1	1		0			0
ERP44_IPI:IPI00401264.5	ERP44	ERP44	1	1	11 / 411	0.026764	1.3	2	0.0347932
GNAI3_IPI:IPI00220578.3	GNAI3	GNAI3	1	1	53 / 411	0.128954	4.1	40	0.52871
SLC25A10_IPI:IPI00015920.2	SLC25A10	SLC25A10	1	1	32 / 411	0.0778589	3.1	16	0.241363
WDR77_IPI:IPI00012202.1	WDR77	WDR77	1	1	162 / 411	0.394161	60.4	1143	23.8073
HNRNPAB_IPI:IPI00334587.1	HNRNPAB	HNRNPAB	1	1	206 / 411	0.501217	3.6	20	1.80438
COPE_IPI:IPI00399318.1	COPE	COPE	1	1	34 / 411	0.0827251	2	5	0.16545
HNRNPD_IPI:IPI00028888.1	HNRNPD	HNRNPD	1	1	216 / 411	0.525547	4.2	28	2.2073
MATR3_IPI:IPI00017297.1	MATR3	MATR3	1	1	171 / 411	0.416058	11.1	96	4.61825
RPLP1_IPI:IPI00008527.3	RPLP1	RPLP1	1	1	180 / 411	0.437956	3.5	35	1.53285
RPS26P54_IPI:IPI00376121.3	RPS26P54	Invalid identifier / gene not available	1	1		0			0
MRPS26_IPI:IPI00006606.1	MRPS26	MRPS26	1	1	20 / 411	0.0486618	1.3	4	0.0632603
FAR1_IPI:IPI00478838.3	FAR1	FAR1	1	1	14 / 411	0.0340633	1.4	4	0.0476886
MRPL4_IPI:IPI00023334.1	MRPL4	MRPL4	1	1	15 / 411	0.0364964	1.5	3	0.0547445
DYNC1H1_IPI:IPI00456969.1	DYNC1H1	DYNC1H1	1	1	131 / 411	0.318735	16.6	121	5.291
COPS4_IPI:IPI00171844.3	COPS4	COPS4	1	1	48 / 411	0.116788	2.3	8	0.268613
C19orf52_IPI:IPI00157215.5	C19ORF52	C19orf52	1	1	2 / 411	0.00486618	1	1	0.00486618
CDKN2AIPNL_IPI:IPI00063181.4	CDKN2AIPNL	CDKN2AIPNL	1	1	1 / 411	0.00243309	1	1	0.00243309
SKP1_IPI:IPI00301364.3	SKP1	SKP1	1	1	145 / 411	0.352798	3.2	63	1.12895
RPS23_IPI:IPI00218606.7	RPS23	RPS23	1	1	160 / 411	0.389294	4.7	28	1.82968
GC_IPI:IPI00555812.4	GC	GC	1	1	0 / 411	0	0	0	0
EPB41L2_IPI:IPI00015973.1	EPB41L2	EPB41L2	1	1	51 / 411	0.124088	15.3	58	1.89854
RUVBL2_IPI:IPI00009104.7	RUVBL2	RUVBL2	1	1	141 / 411	0.343066	10.4	93	3.56788
HNRPLL_IPI:IPI00103247.1	HNRPLL	HNRNPLL	1	1	21 / 411	0.0510949	2.5	8	0.127737
MRPL50_IPI:IPI00329036.2	MRPL50	MRPL50	1	1	2 / 411	0.00486618	1	1	0.00486618
NUP133_IPI:IPI00291200.2	NUP133	NUP133	1	1	45 / 411	0.109489	5	25	0.547445
MRPL11_IPI:IPI00007001.1	MRPL11	MRPL11	1	1	11 / 411	0.026764	1.8	4	0.0481752
ATXN2L_IPI:IPI00639962.1	ATXN2L	ATXN2L	1	1	127 / 411	0.309002	17.4	113	5.37664
SFRS5_IPI:IPI00012341.1	SFRS5	SRSF5	1	1	112 / 411	0.272506	2.1	15	0.572263
COPG_IPI:IPI00783982.1	COPG	COPG1	1	1	78 / 411	0.189781	3.2	19	0.607299
CIRBP_IPI:IPI00180954.4	CIRBP	CIRBP	1	1	107 / 411	0.260341	8.2	35	2.13479
PAK1_IPI:IPI00289746.2	PAK1	PAK1	1	1	9 / 411	0.0218978	1.3	2	0.0284672
CDKN2A_IPI:IPI00001560.2	CDKN2A	CDKN2A	1	1	25 / 411	0.0608273	1.5	6	0.0912409
MARK3_IPI:IPI00183118.4	MARK3	MARK3	1	1	7 / 411	0.0170316	1.1	2	0.0187348
TOMM20_IPI:IPI00016676.1	TOMM20	TOMM20	1	1	5 / 411	0.0121655	1.2	2	0.0145985
LOC100131813_IPI:IPI00886929.1	LOC100131813	Invalid identifier / gene not available	1	1		0			0
SCD_IPI:IPI00299468.3	SCD	SCD	1	1	6 / 411	0.0145985	1.2	2	0.0175182
DNAJC11_IPI:IPI00333016.6	DNAJC11	DNAJC11	1	1	10 / 411	0.0243309	1.2	2	0.0291971
TCEB2_IPI:IPI00026670.3	TCEB2	TCEB2	1	1	18 / 411	0.0437956	1.2	2	0.0525547
IGF2BP3_IPI:IPI00658000.2	IGF2BP3	IGF2BP3	1	1	87 / 411	0.211679	4.6	35	0.973723
PABPN1_IPI:IPI00005792.2	PABPN1	PABPN1	1	1	50 / 411	0.121655	2.4	8	0.291971
ARHGEF7_IPI:IPI00449906.4	ARHGEF7	ARHGEF7	1	1	10 / 411	0.0243309	1.2	2	0.0291971
MRPL12_IPI:IPI00005537.2	MRPL12	MRPL12	1	1	74 / 411	0.180049	1.9	9	0.342092
SAMM50_IPI:IPI00412713.4	SAMM50	SAMM50	1	1	8 / 411	0.0194647	3.6	12	0.070073
DHCR7_IPI:IPI00294501.1	DHCR7	DHCR7	1	1	17 / 411	0.0413625	1.8	6	0.0744526
SRPK1_IPI:IPI00290439.2	SRPK1	SRPK1	1	1	52 / 411	0.126521	3.6	11	0.455474
LRRC41_IPI:IPI00025516.1	LRRC41	LRRC41	1	1	4 / 411	0.00973236	1	1	0.00973236
MSH6_IPI:IPI00106847.3	MSH6	MSH6	1	1	56 / 411	0.136253	3.1	19	0.422384
RBBP4_IPI:IPI00328319.8	RBBP4	RBBP4	1	1	148 / 411	0.360097	4	22	1.44039
DGKE_IPI:IPI00003293.1	DGKE	DGKE	1	1	1 / 411	0.00243309	2	2	0.00486618
PCCB_IPI:IPI00007247.4	PCCB	PCCB	1	1	93 / 411	0.226277	48.4	263	10.9518
MTHFD1L_IPI:IPI00291646.3	MTHFD1L	MTHFD1L	1	1	75 / 411	0.182482	5.5	40	1.00365
NCAPD2_IPI:IPI00299524.1	NCAPD2	NCAPD2	1	1	52 / 411	0.126521	3.1	17	0.392214
GNAI2_IPI:IPI00217906.3	GNAI2	GNAI2	1	1	50 / 411	0.121655	3.9	25	0.474453
ATXN2_IPI:IPI00180154.4	ATXN2	ATXN2	1	1	33 / 411	0.080292	2	5	0.160584
MYL6_IPI:IPI00335168.9	MYL6	MYL6	1	1	190 / 411	0.462287	4.5	42	2.08029
ATP2A3_IPI:IPI00004092.2	ATP2A3	ATP2A3	1	1	35 / 411	0.0851582	2.7	20	0.229927
VCP_IPI:IPI00022774.3	VCP	VCP	1	1	167 / 411	0.406326	20.1	134	8.16715
NECAP1_IPI:IPI00170916.1	NECAP1	NECAP1	1	1	0 / 411	0	0	0	0
TP53_IPI:IPI00375319.3	TP53	TP53	1	1	52 / 411	0.126521	5.4	31	0.683212
ACP1_IPI:IPI00219861.3	ACP1	ACP1	1	1	18 / 411	0.0437956	1.7	4	0.0744526
SLC39A10_IPI:IPI00008085.5	SLC39A10	SLC39A10	1	1	0 / 411	0	0	0	0
PPP2R2C_IPI:IPI00032462.3	PPP2R2C	PPP2R2C	1	1	36 / 411	0.0875912	1.1	2	0.0963504
STAU1_IPI:IPI00000001.2	STAU1	STAU1	1	1	58 / 411	0.141119	4.7	20	0.66326
CHCHD1_IPI:IPI00060107.3	CHCHD1	CHCHD1	1	1	26 / 411	0.0632603	1.7	3	0.107543
RCC2_IPI:IPI00465044.2	RCC2	RCC2	1	1	111 / 411	0.270073	5.2	33	1.40438
PGRMC1_IPI:IPI00220739.3	PGRMC1	PGRMC1	1	1	40 / 411	0.0973236	1.6	4	0.155718
PREB_IPI:IPI00033349.3	PREB	PREB	1	1	4 / 411	0.00973236	1.8	3	0.0175182
NOL9_IPI:IPI00002902.5	NOL9	NOL9	1	1	34 / 411	0.0827251	2.7	9	0.223358
MSI2_IPI:IPI00073713.3	MSI2	MSI2	1	1	13 / 411	0.0316302	1.2	3	0.0379562
LCN1_IPI:IPI00009650.1	LCN1	LCN1	1	1	30 / 411	0.0729927	1.8	17	0.131387
LETM1_IPI:IPI00017592.1	LETM1	LETM1	1	1	18 / 411	0.0437956	1.6	9	0.070073
U2AF1_IPI:IPI00005613.3	U2AF1	U2AF1	1	1	127 / 411	0.309002	3.4	14	1.05061
LARP4B_IPI:IPI00827634.2	LARP4B	LARP4B	1	1	20 / 411	0.0486618	1.5	3	0.0729927
UBXN4_IPI:IPI00293946.5	UBXN4	UBXN4	1	1	8 / 411	0.0194647	1.4	3	0.0272506
UPF1_IPI:IPI00034049.1	UPF1	UPF1	1	1	35 / 411	0.0851582	6.1	44	0.519465
MYO6_IPI:IPI00844172.1	MYO6	MYO6	1	1	42 / 411	0.10219	6	50	0.613139
RHBDD1_IPI:IPI00152700.3	RHBDD1	RHBDD1	1	1	0 / 411	0	0	0	0
GMDS_IPI:IPI00030207.1	GMDS	GMDS	1	1	3 / 411	0.00729927	1	1	0.00729927
PPP2R1A_IPI:IPI00554737.3	PPP2R1A	PPP2R1A	1	1	132 / 411	0.321168	5.4	43	1.73431
TELO2_IPI:IPI00016868.3	TELO2	TELO2	1	1	10 / 411	0.0243309	1.8	4	0.0437956
TMEM33_IPI:IPI00299084.1	TMEM33	TMEM33	1	1	34 / 411	0.0827251	1.9	6	0.157178
CCT7_IPI:IPI00018465.1	CCT7	CCT7	1	1	172 / 411	0.418491	14.6	118	6.10998
CYBA_IPI:IPI00218433.5	CYBA	CYBA	1	1	0 / 411	0	0	0	0
IPI:IPI00556589.3_IPI:IPI00556589.3	IPI:IPI00556589	Invalid identifier / gene not available	1	1		0			0
EIF2S1_IPI:IPI00219678.3	EIF2S1	EIF2S1	1	1	101 / 411	0.245742	2.3	10	0.565207
DLST_IPI:IPI00384122.5	DLST	DLST	1	1	57 / 411	0.138686	3.7	20	0.513139
UNC119B_IPI:IPI00414629.2	UNC119B	UNC119B	1	1	4 / 411	0.00973236	1	1	0.00973236
HSPC152_IPI:IPI00009010.3	HSPC152	Invalid identifier / gene not available	1	1		0			0
UBAP2L_IPI:IPI00005416.5	UBAP2L	UBAP2L	1	1	129 / 411	0.313869	10.4	41	3.26423
GNG12_IPI:IPI00221232.9	GNG12	GNG12	1	1	25 / 411	0.0608273	2	6	0.121655
GNPAT_IPI:IPI00005677.1	GNPAT	GNPAT	1	1	5 / 411	0.0121655	1	1	0.0121655
PRAF2_IPI:IPI00026994.3	PRAF2	PRAF2	1	1	6 / 411	0.0145985	1	1	0.0145985
IPI:IPI00829827.1_IPI:IPI00829827.1	IPI:IPI00829827	Invalid identifier / gene not available	1	1		0			0
FAM71E2_IPI:IPI00740551.4	FAM71E2	FAM71E2	1	1	0 / 411	0	0	0	0
ACACB_IPI:IPI00013003.2	ACACB	ACACB	1	1	60 / 411	0.145985	29.9	144	4.36496
RPL21P19_IPI:IPI00247583.5	RPL21P19	Invalid identifier / gene not available	1	1		0			0
PGAM5_IPI:IPI00788907.2	PGAM5	PGAM5	1	1	73 / 411	0.177616	5.2	29	0.923601
WDR61_IPI:IPI00019269.3	WDR61	WDR61	1	1	48 / 411	0.116788	2.6	16	0.30365
MCM4_IPI:IPI00018349.5	MCM4	MCM4	1	1	113 / 411	0.274939	5.9	42	1.62214
NAP1L1_IPI:IPI00023860.1	NAP1L1	NAP1L1	1	1	152 / 411	0.36983	5.2	25	1.92311
NUP205_IPI:IPI00783781.1	NUP205	NUP205	1	1	37 / 411	0.0900243	4.1	25	0.3691
NDUFA10_IPI:IPI00029561.1	NDUFA10	NDUFA10	1	1	16 / 411	0.0389294	1.4	2	0.0545012
C1orf77_IPI:IPI00300990.5	C1ORF77	Invalid identifier / gene not available	1	1		0			0
RPL23A_IPI:IPI00021266.1	RPL23A	RPL23A	1	1	224 / 411	0.545012	4.7	30	2.56156
WRNIP1_IPI:IPI00102997.1	WRNIP1	WRNIP1	1	1	26 / 411	0.0632603	3.6	8	0.227737
EXOC8_IPI:IPI00028264.3	EXOC8	EXOC8	1	1	2 / 411	0.00486618	1	1	0.00486618
HSP90AA2_IPI:IPI00031523.4	HSP90AA2	Invalid identifier / gene not available	1	1		0			0
YIPF5_IPI:IPI00334657.7	YIPF5	YIPF5	1	1	7 / 411	0.0170316	1.1	2	0.0187348
SLC7A5_IPI:IPI00008986.1	SLC7A5	SLC7A5	1	1	35 / 411	0.0851582	3.4	11	0.289538
UQCRC2_IPI:IPI00305383.1	UQCRC2	UQCRC2	1	1	38 / 411	0.0924574	3.5	20	0.323601
HSPD1_IPI:IPI00076042.2	HSPD1	HSPD1	1	1	231 / 411	0.562044	17.9	165	10.0606
EEF1A2_IPI:IPI00014424.1	EEF1A2	EEF1A2	1	1	343 / 411	0.83455	13.4	175	11.183
DNAJA3_IPI:IPI00179187.3	DNAJA3	DNAJA3	1	1	33 / 411	0.080292	1.8	4	0.144526
SSR3_IPI:IPI00009235.2	SSR3	SSR3	1	1	19 / 411	0.0462287	1.5	5	0.0693431
HNRNPL_IPI:IPI00027834.3	HNRNPL	HNRNPL	1	1	190 / 411	0.462287	11.3	236	5.22384
POP7_IPI:IPI00027142.2	POP7	POP7	1	1	11 / 411	0.026764	1.5	3	0.040146
RANBP6_IPI:IPI00514622.2	RANBP6	RANBP6	1	1	12 / 411	0.0291971	1.2	2	0.0350365
HNRPDL_IPI:IPI00011274.3	HNRPDL	Invalid identifier / gene not available	1	1		0			0
KIRREL_IPI:IPI00470360.1	KIRREL	KIRREL	1	1	1 / 411	0.00243309	4	4	0.00973236
IPI:IPI00911039.1_IPI:IPI00911039.1	IPI:IPI00911039	Invalid identifier / gene not available	1	1		0			0
EEF1B2_IPI:IPI00178440.3	EEF1B2	EEF1B2	1	1	169 / 411	0.411192	4.5	27	1.85036
MTPAP_IPI:IPI00153051.5	MTPAP	MTPAP	1	1	12 / 411	0.0291971	1.4	3	0.0408759
NOC4L_IPI:IPI00031661.1	NOC4L	NOC4L	1	1	23 / 411	0.0559611	2.1	11	0.117518
HSPB1_IPI:IPI00025512.2	HSPB1	HSPB1	1	1	71 / 411	0.172749	6.3	25	1.08832
PDXDC1_IPI:IPI00384689.3	PDXDC1	PDXDC1	1	1	5 / 411	0.0121655	1	1	0.0121655
FAM120A_IPI:IPI00384265.5	FAM120A	FAM120A	1	1	35 / 411	0.0851582	6.1	78	0.519465
RPS27_IPI:IPI00513971.5	RPS27	RPS27	1	1	185 / 411	0.450122	3	28	1.35036
GFM1_IPI:IPI00154473.5	GFM1	GFM1	1	1	12 / 411	0.0291971	6	14	0.175182
HLA-B_IPI:IPI00004657.1	HLA-B	HLA-B	1	1	19 / 411	0.0462287	1.4	3	0.0647202
VDAC1_IPI:IPI00216308.5	VDAC1	VDAC1	1	1	58 / 411	0.141119	4.6	31	0.649148
ASPH_IPI:IPI00024572.3	ASPH	ASPH	1	1	14 / 411	0.0340633	1.9	4	0.0647202
ENDOD1_IPI:IPI00001952.5	ENDOD1	ENDOD1	1	1	1 / 411	0.00243309	1	1	0.00243309
CUL3_IPI:IPI00014312.1	CUL3	CUL3	1	1	11 / 411	0.026764	1.7	6	0.0454988
EIF4E_IPI:IPI00027485.3	EIF4E	EIF4E	1	1	19 / 411	0.0462287	2.1	5	0.0970803
BCAS2_IPI:IPI00025178.3	BCAS2	BCAS2	1	1	40 / 411	0.0973236	4.9	18	0.476886
SNRPD3_IPI:IPI00017964.1	SNRPD3	SNRPD3	1	1	176 / 411	0.428224	6.9	152	2.95474
UTP14C_IPI:IPI00643365.2	UTP14C	UTP14C	1	1	28 / 411	0.0681265	1.4	2	0.0953771
SQSTM1_IPI:IPI00013676.1	SQSTM1	SQSTM1	1	1	47 / 411	0.114355	5.2	26	0.594647
PCBP1_IPI:IPI00016610.2	PCBP1	PCBP1	1	1	194 / 411	0.472019	8.2	108	3.87056
SNRPB_IPI:IPI00027285.1	SNRPB	SNRPB	1	1	170 / 411	0.413625	11.2	196	4.6326
IPI:IPI00176696.2_IPI:IPI00176696.2	IPI:IPI00176696	Invalid identifier / gene not available	1	1		0			0
LSG1_IPI:IPI00300094.6	LSG1	LSG1	1	1	18 / 411	0.0437956	3	9	0.131387
IPI:IPI00640597.1_IPI:IPI00640597.1	IPI:IPI00640597	Invalid identifier / gene not available	1	1		0			0
MCM5_IPI:IPI00018350.3	MCM5	MCM5	1	1	100 / 411	0.243309	5	34	1.21655
CKAP2_IPI:IPI00071824.3	CKAP2	CKAP2	1	1	40 / 411	0.0973236	1.7	7	0.16545
LETMD1_IPI:IPI00607602.2	LETMD1	LETMD1	1	1	0 / 411	0	0	0	0
PTRF_IPI:IPI00176903.2	PTRF	PTRF	1	1	18 / 411	0.0437956	3.8	31	0.166423
TARDBP_IPI:IPI00025815.2	TARDBP	TARDBP	1	1	91 / 411	0.221411	3	18	0.664234
HADHB_IPI:IPI00022793.5	HADHB	HADHB	1	1	47 / 411	0.114355	3.8	22	0.43455
PTPN1_IPI:IPI00297261.3	PTPN1	PTPN1	1	1	21 / 411	0.0510949	1.9	4	0.0970803
MAP1B_IPI:IPI00008868.3	MAP1B	MAP1B	1	1	94 / 411	0.22871	19	184	4.3455
PSMD4_IPI:IPI00022694.3	PSMD4	PSMD4	1	1	73 / 411	0.177616	3.3	11	0.586131
SLC12A2_IPI:IPI00022649.3	SLC12A2	SLC12A2	1	1	5 / 411	0.0121655	1	1	0.0121655
LARS_IPI:IPI00103994.4	LARS	LARS	1	1	131 / 411	0.318735	7.3	62	2.32676
CNOT2_IPI:IPI00005011.1	CNOT2	CNOT2	1	1	17 / 411	0.0413625	1.5	3	0.0620438
C19orf70_IPI:IPI00329373.3	C19ORF70	Invalid identifier / gene not available	1	1		0			0
PWP2_IPI:IPI00300078.6	PWP2	PWP2	1	1	23 / 411	0.0559611	4.7	18	0.263017
POLR2E_IPI:IPI00291093.3	POLR2E	POLR2E	1	1	61 / 411	0.148418	2.2	12	0.326521
RBM25_IPI:IPI00004273.6	RBM25	RBM25	1	1	77 / 411	0.187348	7.7	44	1.44258
ARD1A_IPI:IPI00013184.1	ARD1A	Invalid identifier / gene not available	1	1		0			0
UHRF1BP1_IPI:IPI00465273.1	UHRF1BP1	UHRF1BP1	1	1	2 / 411	0.00486618	1	1	0.00486618
KIAA1033_IPI:IPI00164930.5	KIAA1033	KIAA1033	1	1	6 / 411	0.0145985	2	4	0.0291971
Magmas_IPI:IPI00218463.3	MAGMAS	Invalid identifier / gene not available	1	1		0			0
BYSL_IPI:IPI00328987.3	BYSL	BYSL	1	1	56 / 411	0.136253	1.6	5	0.218005
C16orf14_IPI:IPI00042604.3	C16ORF14	Invalid identifier / gene not available	1	1		0			0
ASNS_IPI:IPI00554777.2	ASNS	ASNS	1	1	42 / 411	0.10219	3.3	17	0.337226
PCCA_IPI:IPI00552419.2	PCCA	PCCA	1	1	94 / 411	0.22871	67.1	342	15.3465
CKB_IPI:IPI00022977.1	CKB	CKB	1	1	163 / 411	0.396594	10.9	99	4.32287
MTCH2_IPI:IPI00003833.3	MTCH2	MTCH2	1	1	26 / 411	0.0632603	2.1	4	0.132847
NCAPH2_IPI:IPI00644022.4	NCAPH2	NCAPH2	1	1	1 / 411	0.00243309	1	1	0.00243309
IMPDH2_IPI:IPI00291510.3	IMPDH2	IMPDH2	1	1	83 / 411	0.201946	3.4	29	0.686618
MTHFD1_IPI:IPI00218342.1	MTHFD1	MTHFD1	1	1	110 / 411	0.26764	8.7	106	2.32847
RPL35_IPI:IPI00412607.6	RPL35	RPL35	1	1	156 / 411	0.379562	3.2	56	1.2146
NXF1_IPI:IPI00033153.1	NXF1	NXF1	1	1	38 / 411	0.0924574	2.1	14	0.194161
EHD4_IPI:IPI00005578.1	EHD4	EHD4	1	1	3 / 411	0.00729927	1.3	2	0.00948905
IFT74_IPI:IPI00018090.2	IFT74	IFT74	1	1	6 / 411	0.0145985	1.8	4	0.0262774
IPO4_IPI:IPI00156374.6	IPO4	IPO4	1	1	28 / 411	0.0681265	2.5	18	0.170316
KNTC1_IPI:IPI00001458.1	KNTC1	KNTC1	1	1	5 / 411	0.0121655	1.6	3	0.0194647
IGKV3-20_IPI:IPI00030205.3	IGKV3-20	Invalid identifier / gene not available	1	1		0			0
NFKB1_IPI:IPI00292537.3	NFKB1	NFKB1	1	1	9 / 411	0.0218978	1.4	4	0.0306569
MRPL22_IPI:IPI00414410.2	MRPL22	MRPL22	1	1	22 / 411	0.053528	1.6	5	0.0856448
DCD_IPI:IPI00027547.2	DCD	DCD	1	1	178 / 411	0.43309	4.5	45	1.94891
SAMHD1_IPI:IPI00294739.1	SAMHD1	SAMHD1	1	1	18 / 411	0.0437956	2.3	13	0.10073
RPL36_IPI:IPI00216237.5	RPL36	RPL36	1	1	93 / 411	0.226277	2.8	9	0.633577
SSB_IPI:IPI00009032.1	SSB	SSB	1	1	102 / 411	0.248175	3.9	26	0.967883
PLCG1_IPI:IPI00016736.1	PLCG1	PLCG1	1	1	6 / 411	0.0145985	1.8	6	0.0262774
SGPL1_IPI:IPI00099463.2	SGPL1	SGPL1	1	1	10 / 411	0.0243309	1.2	2	0.0291971
HSD17B12_IPI:IPI00007676.3	HSD17B12	HSD17B12	1	1	27 / 411	0.0656934	1.9	7	0.124818
GBF1_IPI:IPI00021954.1	GBF1	GBF1	1	1	6 / 411	0.0145985	1.5	4	0.0218978
DHX30_IPI:IPI00164906.4	DHX30	DHX30	1	1	62 / 411	0.150852	9.4	50	1.418
MRPL39_IPI:IPI00084571.4	MRPL39	MRPL39	1	1	25 / 411	0.0608273	1.5	5	0.0912409
COX7A2_IPI:IPI00026570.2	COX7A2	COX7A2	1	1	12 / 411	0.0291971	1.1	2	0.0321168
ACTA2_IPI:IPI00927545.1	ACTA2	ACTA2	1	1	351 / 411	0.854015	18.6	294	15.8847
CEP170_IPI:IPI00186194.5	CEP170	CEP170	1	1	46 / 411	0.111922	9.6	34	1.07445
CDC5L_IPI:IPI00465294.2	CDC5L	CDC5L	1	1	79 / 411	0.192214	13	48	2.49878
C17orf42_IPI:IPI00170503.2	C17ORF42	Invalid identifier / gene not available	1	1		0			0
TPR_IPI:IPI00742682.2	TPR	TPR	1	1	72 / 411	0.175182	40.4	269	7.07737
MRPS7_IPI:IPI00006440.6	MRPS7	MRPS7	1	1	29 / 411	0.0705596	1.5	4	0.105839
DEGS1_IPI:IPI00021147.1	DEGS1	DEGS1	1	1	1 / 411	0.00243309	1	1	0.00243309
BUB3_IPI:IPI00013468.1	BUB3	BUB3	1	1	112 / 411	0.272506	3.3	14	0.89927
RPS27_IPI:IPI00397358.4	RPS27	RPS27	1	1	185 / 411	0.450122	3	28	1.35036
TMEM57_IPI:IPI00296938.1	TMEM57	TMEM57	1	1	0 / 411	0	0	0	0
SMPD4_IPI:IPI00743121.2	SMPD4	SMPD4	1	1	7 / 411	0.0170316	1.1	2	0.0187348
IPI:IPI00383732.1_IPI:IPI00383732.1	IPI:IPI00383732	Invalid identifier / gene not available	1	1		0			0
IPI:IPI00909382.1_IPI:IPI00909382.1	IPI:IPI00909382	Invalid identifier / gene not available	1	1		0			0
RHOT2_IPI:IPI00386323.2	RHOT2	RHOT2	1	1	9 / 411	0.0218978	1.3	2	0.0284672
IGHG1_IPI:IPI00384938.1	IGHG1	Invalid identifier / gene not available	1	1		0			0
HNRNPCL1_IPI:IPI00027569.1	HNRNPCL1	HNRNPCL1	1	1	144 / 411	0.350365	4	22	1.40146
PPP2R2D_IPI:IPI00184845.3	PPP2R2D	PPP2R2D	1	1	56 / 411	0.136253	1.6	6	0.218005
PRPF4_IPI:IPI00150269.1	PRPF4	PRPF4	1	1	50 / 411	0.121655	5.2	16	0.632603
ZC3HAV1_IPI:IPI00332936.1	ZC3HAV1	ZC3HAV1	1	1	58 / 411	0.141119	6.3	28	0.889051
HDAC1_IPI:IPI00013774.1	HDAC1	HDAC1	1	1	108 / 411	0.262774	3.6	26	0.945985
UBE3C_IPI:IPI00604464.3	UBE3C	UBE3C	1	1	6 / 411	0.0145985	1.8	4	0.0262774
PNKD_IPI:IPI00001022.5	PNKD	PNKD	1	1	10 / 411	0.0243309	1.3	2	0.0316302
XPO5_IPI:IPI00549861.4	XPO5	XPO5	1	1	45 / 411	0.109489	2.3	27	0.251825
ATP4A_IPI:IPI00218919.7	ATP4A	ATP4A	1	1	64 / 411	0.155718	1.6	9	0.249148
FKBPL_IPI:IPI00032110.1	FKBPL	FKBPL	1	1	0 / 411	0	0	0	0
SLC27A4_IPI:IPI00101335.2	SLC27A4	SLC27A4	1	1	2 / 411	0.00486618	1	1	0.00486618
KARS_IPI:IPI00014238.2	KARS	KARS	1	1	70 / 411	0.170316	4.6	20	0.783455
CHD6_IPI:IPI00220289.7	CHD6	CHD6	1	1	18 / 411	0.0437956	1.6	3	0.070073
C5orf51_IPI:IPI00374272.3	C5ORF51	C5orf51	1	1	2 / 411	0.00486618	1	1	0.00486618
GOLM1_IPI:IPI00171411.4	GOLM1	GOLM1	1	1	2 / 411	0.00486618	1	1	0.00486618
SNRPC_IPI:IPI00013396.3	SNRPC	SNRPC	1	1	96 / 411	0.233577	1.9	7	0.443796
MANEAL_IPI:IPI00440580.3	MANEAL	MANEAL	1	1	0 / 411	0	0	0	0
SKP1_IPI:IPI00172421.7	SKP1	SKP1	1	1	145 / 411	0.352798	3.2	63	1.12895
CLK3_IPI:IPI00298896.8	CLK3	CLK3	1	1	22 / 411	0.053528	3.9	9	0.208759
SFRS1_IPI:IPI00215884.4	SFRS1	Invalid identifier / gene not available	1	1		0			0
MYO6_IPI:IPI00008455.1	MYO6	MYO6	1	1	42 / 411	0.10219	6	50	0.613139
MRPL28_IPI:IPI00172594.3	MRPL28	MRPL28	1	1	12 / 411	0.0291971	1.9	4	0.0554745
FAM62A_IPI:IPI00022143.3	FAM62A	Invalid identifier / gene not available	1	1		0			0
ACLY_IPI:IPI00021290.5	ACLY	ACLY	1	1	118 / 411	0.287105	12.4	118	3.5601
CDK4_IPI:IPI00007811.1	CDK4	CDK4	1	1	27 / 411	0.0656934	2.4	28	0.157664
APOD_IPI:IPI00006662.1	APOD	APOD	1	1	14 / 411	0.0340633	4.1	12	0.139659
LIG3_IPI:IPI00000156.3	LIG3	LIG3	1	1	20 / 411	0.0486618	3.4	25	0.16545
ARCN1_IPI:IPI00298520.4	ARCN1	ARCN1	1	1	92 / 411	0.223844	3.5	18	0.783455
RBM22_IPI:IPI00019046.4	RBM22	RBM22	1	1	25 / 411	0.0608273	4.8	16	0.291971
MRPS18B_IPI:IPI00022316.3	MRPS18B	MRPS18B	1	1	27 / 411	0.0656934	1.9	6	0.124818
RAVER1_IPI:IPI00217661.4	RAVER1	RAVER1	1	1	42 / 411	0.10219	1.9	18	0.194161
ANXA2P2_IPI:IPI00334627.3	ANXA2P2	Invalid identifier / gene not available	1	1		0			0
RANP1_IPI:IPI00044779.2	RANP1	Invalid identifier / gene not available	1	1		0			0
C4orf43_IPI:IPI00019962.3	C4ORF43	Invalid identifier / gene not available	1	1		0			0
SNRPD1_IPI:IPI00302850.4	SNRPD1	SNRPD1	1	1	193 / 411	0.469586	6.6	63	3.09927
GNA13_IPI:IPI00290928.2	GNA13	GNA13	1	1	22 / 411	0.053528	1.3	5	0.0695864
GNAL_IPI:IPI00006395.1	GNAL	GNAL	1	1	38 / 411	0.0924574	1.6	8	0.147932
APOOL_IPI:IPI00394809.1	APOOL	APOOL	1	1	2 / 411	0.00486618	1	1	0.00486618
NACC1_IPI:IPI00045207.2	NACC1	NACC1	1	1	19 / 411	0.0462287	2.6	5	0.120195
VPS16A_IPI:IPI00305438.3	VPS16A	Invalid identifier / gene not available	1	1		0			0
FAU_IPI:IPI00019770.3	FAU	FAU	1	1	143 / 411	0.347932	2.3	11	0.800243
SERPINB4_IPI:IPI00010303.1	SERPINB4	SERPINB4	1	1	25 / 411	0.0608273	5.5	38	0.33455
EIF4B_IPI:IPI00012079.3	EIF4B	EIF4B	1	1	167 / 411	0.406326	20.3	174	8.24842
TUBA4B_IPI:IPI00017454.4	TUBA4B	Invalid identifier / gene not available	1	1		0			0
TMX1_IPI:IPI00395887.4	TMX1	TMX1	1	1	23 / 411	0.0559611	1.2	2	0.0671533
UBE3C_IPI:IPI00411748.3	UBE3C	UBE3C	1	1	6 / 411	0.0145985	1.8	4	0.0262774
NDUFA4_IPI:IPI00011770.1	NDUFA4	NDUFA4	1	1	7 / 411	0.0170316	1.4	3	0.0238443
MAP7D1_IPI:IPI00645814.1	MAP7D1	MAP7D1	1	1	24 / 411	0.0583942	3	9	0.175182
SFRS6_IPI:IPI00012345.2	SFRS6	Invalid identifier / gene not available	1	1		0			0
OGFOD2_IPI:IPI00010276.7	OGFOD2	OGFOD2	1	1	0 / 411	0	0	0	0
B3GALT6_IPI:IPI00064848.2	B3GALT6	B3GALT6	1	1	1 / 411	0.00243309	1	1	0.00243309
RPL28_IPI:IPI00182533.5	RPL28	RPL28	1	1	109 / 411	0.265207	5.7	24	1.51168
SLC27A2_IPI:IPI00024787.1	SLC27A2	SLC27A2	1	1	0 / 411	0	0	0	0
MARK2_IPI:IPI00290158.6	MARK2	MARK2	1	1	6 / 411	0.0145985	1.2	2	0.0175182
MRPS15_IPI:IPI00550037.3	MRPS15	MRPS15	1	1	15 / 411	0.0364964	1.1	3	0.040146

## Sheet: SIVmac Nef
SIVmac Nef
IPI	User Input	Mapped Gene Symbol	Unique peptide	Total peptide	ExpAP	ExpAP Calculated	Ave SC	Max SC	ExpAP x Ave SC
ACACA_IPI:IPI00011569.2	ACACA	ACACA	91	167	86 / 411	0.209246	139.1	840	29.1061
PRKDC_IPI:IPI00296337.2	PRKDC	PRKDC	65	80	175 / 411	0.425791	22	175	9.3674
EXOC4_IPI:IPI00059279.5	EXOC4	EXOC4	37	61	43 / 411	0.104623	1.6	5	0.167397
DENND4C_IPI:IPI00100453.7	DENND4C	DENND4C	33	42	13 / 411	0.0316302	1.5	3	0.0474453
PC_IPI:IPI00299402.1	PC	PC	28	36	106 / 411	0.257908	180.2	1354	46.4749
EXOC3_IPI:IPI00157734.2	EXOC3	EXOC3	26	51	5 / 411	0.0121655	1.4	2	0.0170316
EXOC1_IPI:IPI00019427.4	EXOC1	EXOC1	26	41	5 / 411	0.0121655	1	1	0.0121655
EXOC2_IPI:IPI00783559.1	EXOC2	EXOC2	22	38	4 / 411	0.00973236	1	1	0.00973236
ATXN2L_IPI:IPI00456359.1	ATXN2L	ATXN2L	20	31	127 / 411	0.309002	17.4	113	5.37664
EXOC7_IPI:IPI00103064.4	EXOC7	EXOC7	19	23	6 / 411	0.0145985	1.2	2	0.0175182
HSPA8_IPI:IPI00003865.1	HSPA8	HSPA8	18	22	396 / 411	0.963504	39.2	332	37.7693
IRS4_IPI:IPI00020729.1	IRS4	IRS4	17	20	152 / 411	0.36983	11	105	4.06813
PAK2_IPI:IPI00419979.3	PAK2	PAK2	16	27	14 / 411	0.0340633	2.7	11	0.0919708
DBT_IPI:IPI00003944.1	DBT	DBT	16	23	89 / 411	0.216545	30.9	169	6.69124
TUBB2C_IPI:IPI00007752.1	TUBB2C	TUBB4B	14	29	376 / 411	0.914842	29.9	310	27.3538
PABPC1_IPI:IPI00008524.1	PABPC1	PABPC1	13	14	172 / 411	0.418491	8.3	104	3.47348
IPI:IPI00719051.3_IPI:IPI00719051.3	IPI:IPI00719051	Invalid identifier / gene not available	13	16		0			0
CAD_IPI:IPI00301263.2	CAD	CAD	13	13	147 / 411	0.357664	11.3	88	4.04161
NUFIP2_IPI:IPI00002349.2	NUFIP2	NUFIP2	12	19	94 / 411	0.22871	10	50	2.2871
MCM3_IPI:IPI00013214.2	MCM3	MCM3	12	13	120 / 411	0.291971	6.6	63	1.92701
ARHGEF7_IPI:IPI00449906.4	ARHGEF7	ARHGEF7	12	18	10 / 411	0.0243309	1.2	2	0.0291971
HNRNPK_IPI:IPI00216049.1	HNRNPK	HNRNPK	12	18	288 / 411	0.70073	16.3	143	11.4219
UBR5_IPI:IPI00026320.1	UBR5	UBR5	12	14	19 / 411	0.0462287	1.6	5	0.0739659
PPP2R1A_IPI:IPI00168184.8	PPP2R1A	PPP2R1A	12	21	132 / 411	0.321168	5.4	43	1.73431
RPS3_IPI:IPI00011253.3	RPS3	RPS3	12	20	266 / 411	0.647202	12	56	7.76642
CKAP4_IPI:IPI00141318.2	CKAP4	CKAP4	12	12	58 / 411	0.141119	5	24	0.705596
TUBA4A_IPI:IPI00007750.1	TUBA4A	TUBA4A	11	30	377 / 411	0.917275	28.6	242	26.2341
KIAA1967_IPI:IPI00182757.1	KIAA1967	CCAR2	11	12	118 / 411	0.287105	6.8	72	1.95231
GIT1_IPI:IPI00384861.3	GIT1	GIT1	11	15	9 / 411	0.0218978	1	1	0.0218978
HSPA9_IPI:IPI00007765.5	HSPA9	HSPA9	11	12	307 / 411	0.746959	19	160	14.1922
RPS3A_IPI:IPI00419880.6	RPS3A	RPS3A	11	11	203 / 411	0.493917	9	51	4.44526
HSPD1_IPI:IPI00784154.1	HSPD1	HSPD1	10	14	231 / 411	0.562044	17.9	165	10.0606
ATP1A1_IPI:IPI00006482.1	ATP1A1	ATP1A4	10	11	45 / 411	0.109489	2.3	15	0.251825
ATP5A1_IPI:IPI00440493.2	ATP5A1	ATP5A1	10	13	210 / 411	0.510949	11	83	5.62044
ARHGEF6_IPI:IPI00014256.2	ARHGEF6	ARHGEF6	10	12	2 / 411	0.00486618	1	1	0.00486618
LRPPRC_IPI:IPI00783271.1	LRPPRC	LRPPRC	10	11	130 / 411	0.316302	15.5	112	4.90268
HSPA1A_IPI:IPI00304925.5	HSPA1A	HSPA1B	10	16	395 / 411	0.961071	42.9	331	41.2299
PFKP_IPI:IPI00009790.1	PFKP	PFKP	9	11	75 / 411	0.182482	4.2	26	0.766423
UBR4_IPI:IPI00180305.7	UBR4	UBR4	9	9	36 / 411	0.0875912	15.2	76	1.33139
ILF2_IPI:IPI00005198.2	ILF2	ILF2	9	10	152 / 411	0.36983	5.5	53	2.03406
HSPA5_IPI:IPI00003362.2	HSPA5	HSPA5	9	12	360 / 411	0.875912	16.9	112	14.8029
TUFM_IPI:IPI00027107.5	TUFM	TUFM	9	11	139 / 411	0.3382	8.6	53	2.90852
ILF3_IPI:IPI00219330.2	ILF3	ILF3	9	9	158 / 411	0.384428	9.4	99	3.61363
IQGAP2_IPI:IPI00299048.6	IQGAP2	IQGAP2	9	9	23 / 411	0.0559611	2	9	0.111922
IMMT_IPI:IPI00009960.6	IMMT	IMMT	9	9	44 / 411	0.107056	5.4	72	0.578102
ATAD3B_IPI:IPI00045921.1	ATAD3B	ATAD3B	9	10	59 / 411	0.143552	4.8	42	0.689051
SLC25A13_IPI:IPI00007084.3	SLC25A13	SLC25A13	9	9	50 / 411	0.121655	3.4	19	0.413625
RPN1_IPI:IPI00025874.2	RPN1	RPN1	9	9	91 / 411	0.221411	3.9	36	0.863504
DDX6_IPI:IPI00030320.4	DDX6	DDX6	8	10	129 / 411	0.313869	6.3	54	1.97737
RPN2_IPI:IPI00028635.4	RPN2	RPN2	8	10	82 / 411	0.199513	2.9	29	0.578589
NCL_IPI:IPI00183526.6	NCL	NCL	8	14	261 / 411	0.635036	16.6	99	10.5416
NCL_IPI:IPI00444262.3	NCL	NCL	8	10	261 / 411	0.635036	16.6	99	10.5416
PPP2R2A_IPI:IPI00332511.5	PPP2R2A	PPP2R2A	8	10	93 / 411	0.226277	3.2	12	0.724088
HNRNPU_IPI:IPI00479217.1	HNRNPU	HNRNPU	8	10	280 / 411	0.681265	15.8	256	10.764
DHX9_IPI:IPI00844578.1	DHX9	DHX9	8	8	205 / 411	0.498783	15.3	169	7.63139
HSPA1L_IPI:IPI00301277.1	HSPA1L	HSPA1L	8	9	389 / 411	0.946472	22.6	189	21.3903
UBR4_IPI:IPI00640981.3	UBR4	UBR4	8	8	36 / 411	0.0875912	15.2	76	1.33139
VDAC2_IPI:IPI00024145.2	VDAC2	VDAC2	8	8	58 / 411	0.141119	8.1	51	1.14307
USP7_IPI:IPI00003965.5	USP7	USP7	8	8	65 / 411	0.158151	4.1	18	0.648418
HNRNPM_IPI:IPI00171903.2	HNRNPM	HNRNPM	8	9	220 / 411	0.53528	15.9	149	8.51095
SYNCRIP_IPI:IPI00018140.3	SYNCRIP	SYNCRIP	7	9	197 / 411	0.479319	6.9	97	3.3073
TUBB_IPI:IPI00011654.2	TUBB	TUBB	7	15	382 / 411	0.92944	37.5	338	34.854
CLPB_IPI:IPI00006615.3	CLPB	CLPB	7	7	30 / 411	0.0729927	1.4	5	0.10219
TRIM28_IPI:IPI00438229.2	TRIM28	TRIM28	7	7	177 / 411	0.430657	12.8	67	5.51241
EXOC8_IPI:IPI00028264.3	EXOC8	EXOC8	7	9	2 / 411	0.00486618	1	1	0.00486618
EXOC6_IPI:IPI00010953.4	EXOC6	EXOC6	7	12	1 / 411	0.00243309	1	1	0.00243309
EXOC6B_IPI:IPI00852806.1	EXOC6B	EXOC6B	7	8	2 / 411	0.00486618	1	1	0.00486618
TCP1_IPI:IPI00290566.1	TCP1	TCP1	7	8	184 / 411	0.447689	18.8	148	8.41655
ATP2A2_IPI:IPI00177817.4	ATP2A2	ATP2A2	7	7	92 / 411	0.223844	4.3	35	0.96253
PSMC2_IPI:IPI00021435.3	PSMC2	PSMC2	7	7	126 / 411	0.306569	5.6	45	1.71679
DDX3X_IPI:IPI00215637.5	DDX3X	DDX3X	7	7	212 / 411	0.515815	10.5	87	5.41606
RPS4X_IPI:IPI00217030.1	RPS4X	RPS4X	7	12	225 / 411	0.547445	9.7	58	5.31022
CCT8_IPI:IPI00302925.4	CCT8	CCT8	7	7	183 / 411	0.445255	24.8	203	11.0423
DDX5_IPI:IPI00017617.1	DDX5	DDX5	7	7	247 / 411	0.600973	8.7	86	5.22847
USP9X_IPI:IPI00003964.4	USP9X	USP9X	7	7	66 / 411	0.160584	3.3	21	0.529927
SMC2_IPI:IPI00007927.4	SMC2	SMC2	7	7	82 / 411	0.199513	5.9	33	1.17713
PKM2_IPI:IPI00220644.8	PKM2	PKM	7	8	249 / 411	0.605839	17.7	181	10.7234
RPS18_IPI:IPI00013296.3	RPS18	RPS18	7	10	229 / 411	0.557178	5.8	40	3.23163
KPNA2_IPI:IPI00002214.1	KPNA2	KPNA2	6	6	162 / 411	0.394161	4.7	36	1.85255
G3BP1_IPI:IPI00012442.1	G3BP1	G3BP1	6	8	141 / 411	0.343066	6.8	84	2.33285
SERBP1_IPI:IPI00410693.3	SERBP1	SERBP1	6	10	175 / 411	0.425791	12	107	5.10949
PHB2_IPI:IPI00027252.6	PHB2	PHB2	6	8	95 / 411	0.231144	5.9	47	1.36375
NPM1_IPI:IPI00220740.1	NPM1	NPM1	6	8	252 / 411	0.613139	16.4	172	10.0555
EMD_IPI:IPI00032003.1	EMD	EMD	6	7	82 / 411	0.199513	3.7	26	0.7382
CSDA_IPI:IPI00031801.4	CSDA	Invalid identifier / gene not available	6	9		0			0
PTPLAD1_IPI:IPI00008998.3	PTPLAD1	PTPLAD1	6	8	55 / 411	0.13382	2.5	17	0.33455
SLC25A3_IPI:IPI00022202.3	SLC25A3	SLC25A3	6	12	130 / 411	0.316302	4.3	49	1.3601
EIF3A_IPI:IPI00029012.1	EIF3A	EIF3A	6	6	111 / 411	0.270073	7.5	56	2.02555
SEC63_IPI:IPI00218922.5	SEC63	SEC63	6	7	11 / 411	0.026764	2.1	11	0.0562044
TIMM50_IPI:IPI00418497.1	TIMM50	TIMM50	6	8	124 / 411	0.301703	4.1	45	1.23698
DYNC1H1_IPI:IPI00456969.1	DYNC1H1	DYNC1H1	6	6	131 / 411	0.318735	16.6	121	5.291
RPS19_IPI:IPI00215780.5	RPS19	RPS19	6	6	181 / 411	0.440389	6.6	58	2.90657
EIF3D_IPI:IPI00006181.1	EIF3D	EIF3D	6	6	81 / 411	0.19708	3	22	0.591241
SLC25A5_IPI:IPI00007188.5	SLC25A5	SLC25A5	6	9	223 / 411	0.542579	7.1	58	3.85231
ARHGEF2_IPI:IPI00291316.5	ARHGEF2	ARHGEF2	6	6	19 / 411	0.0462287	1.5	3	0.0693431
AP2M1_IPI:IPI00022256.3	AP2M1	AP2M1	6	6	21 / 411	0.0510949	1.8	6	0.0919708
DDB1_IPI:IPI00293464.5	DDB1	DDB1	6	6	103 / 411	0.250608	4.8	52	1.20292
EXOC6_IPI:IPI00163337.7	EXOC6	EXOC6	6	8	1 / 411	0.00243309	1	1	0.00243309
HNRNPA3_IPI:IPI00419373.1	HNRNPA3	HNRNPA3	6	7	183 / 411	0.445255	4.4	43	1.95912
RPL6_IPI:IPI00329389.8	RPL6	RPL6	6	6	172 / 411	0.418491	11.5	249	4.81265
HIST1H1C_IPI:IPI00217465.5	HIST1H1C	HIST1H1C	6	7	301 / 411	0.73236	10.4	76	7.61655
YBX1_IPI:IPI00031812.3	YBX1	YBX1	5	6	233 / 411	0.56691	7.2	101	4.08175
CCT2_IPI:IPI00297779.7	CCT2	CCT2	5	6	180 / 411	0.437956	22.3	242	9.76642
HSP90AA1_IPI:IPI00382470.3	HSP90AA1	HSP90AA1	5	5	272 / 411	0.6618	30	327	19.854
DNAJA2_IPI:IPI00032406.1	DNAJA2	DNAJA2	5	6	90 / 411	0.218978	3.1	9	0.678832
RPS14_IPI:IPI00026271.5	RPS14	RPS14	5	7	259 / 411	0.63017	4.6	33	2.89878
EIF3L_IPI:IPI00465233.1	EIF3L	EIF3L	5	6	92 / 411	0.223844	4.7	23	1.05207
HNRNPR_IPI:IPI00012074.3	HNRNPR	HNRNPR	5	5	188 / 411	0.457421	7.7	173	3.52214
POLDIP3_IPI:IPI00440688.4	POLDIP3	POLDIP3	5	6	79 / 411	0.192214	6.2	27	1.19173
AP1B1_IPI:IPI00328257.4	AP1B1	AP1B1	5	5	45 / 411	0.109489	1.8	16	0.19708
VDAC3_IPI:IPI00031804.1	VDAC3	VDAC3	5	5	46 / 411	0.111922	3.9	13	0.436496
PPP2CA_IPI:IPI00008380.1	PPP2CA	PPP2CA	5	9	84 / 411	0.20438	2.2	9	0.449635
EIF4A1_IPI:IPI00025491.1	EIF4A1	EIF4A1	5	5	190 / 411	0.462287	9.2	87	4.25304
GIT2_IPI:IPI00216991.1	GIT2	GIT2	5	6	3 / 411	0.00729927	1	1	0.00729927
HSP90AB1_IPI:IPI00414676.6	HSP90AB1	HSP90AB1	5	5	277 / 411	0.673966	30.7	278	20.6908
YME1L1_IPI:IPI00045946.4	YME1L1	YME1L1	5	5	8 / 411	0.0194647	1.1	2	0.0214112
AIFM1_IPI:IPI00000690.1	AIFM1	AIFM1	5	6	101 / 411	0.245742	7.8	92	1.91679
EIF4G1_IPI:IPI00386533.3	EIF4G1	EIF4G1	5	6	102 / 411	0.248175	13.3	78	3.30073
AP2A2_IPI:IPI00016621.7	AP2A2	AP2A2	5	6	21 / 411	0.0510949	2	10	0.10219
DNAJA1_IPI:IPI00012535.1	DNAJA1	DNAJA1	5	7	115 / 411	0.279805	3.6	15	1.0073
ACAD9_IPI:IPI00152981.1	ACAD9	ACAD9	5	5	11 / 411	0.026764	1.6	4	0.0428224
AP2B1_IPI:IPI00784156.1	AP2B1	AP2B1	5	5	54 / 411	0.131387	2.5	20	0.328467
AP2A1_IPI:IPI00256684.1	AP2A1	AP2A1	5	5	24 / 411	0.0583942	2.4	14	0.140146
RPS2_IPI:IPI00013485.3	RPS2	RPS2	5	7	210 / 411	0.510949	7.3	52	3.72993
EIF3CL_IPI:IPI00016910.1	EIF3CL	EIF3CL	5	6	109 / 411	0.265207	4.9	26	1.29951
MCCC2_IPI:IPI00784044.1	MCCC2	MCCC2	5	5	93 / 411	0.226277	41.7	391	9.43577
MATR3_IPI:IPI00017297.1	MATR3	MATR3	5	5	171 / 411	0.416058	11.1	96	4.61825
PHB_IPI:IPI00017334.1	PHB	PHB	5	5	85 / 411	0.206813	3.9	34	0.806569
ERC1_IPI:IPI00171230.6	ERC1	ERC1	5	7	44 / 411	0.107056	3.3	11	0.353285
ACACB_IPI:IPI00013003.2	ACACB	ACACB	5	5	60 / 411	0.145985	29.9	144	4.36496
RPL23_IPI:IPI00010153.5	RPL23	RPL23	5	6	243 / 411	0.591241	5.7	48	3.37007
PAK3_IPI:IPI00027382.1	PAK3	PAK3	5	6	7 / 411	0.0170316	1.1	2	0.0187348
RPS9_IPI:IPI00221088.5	RPS9	RPS9	5	5	170 / 411	0.413625	6	35	2.48175
RPL4_IPI:IPI00003918.6	RPL4	RPL4	5	5	197 / 411	0.479319	9.6	81	4.60146
PABPC4_IPI:IPI00012726.4	PABPC4	PABPC4	5	5	142 / 411	0.345499	6.7	72	2.31484
HAX1_IPI:IPI00010440.5	HAX1	HAX1	4	4	29 / 411	0.0705596	1.7	7	0.119951
RPS17_IPI:IPI00221093.7	RPS17	RPS17L	4	8	177 / 411	0.430657	4.7	42	2.02409
YWHAQ_IPI:IPI00018146.1	YWHAQ	YWHAQ	4	5	153 / 411	0.372263	4.3	91	1.60073
PON1_IPI:IPI00218732.3	PON1	PON1	4	5	9 / 411	0.0218978	1.4	3	0.0306569
PAK1_IPI:IPI00289746.2	PAK1	PAK1	4	6	9 / 411	0.0218978	1.3	2	0.0284672
EEF1A1_IPI:IPI00025447.8	EEF1A1	EEF1A1	4	6	350 / 411	0.851582	21.9	230	18.6496
APOE_IPI:IPI00021842.1	APOE	APOE	4	4	6 / 411	0.0145985	1	1	0.0145985
CTPS_IPI:IPI00290142.5	CTPS	Invalid identifier / gene not available	4	4		0			0
C1QBP_IPI:IPI00014230.1	C1QBP	C1QBP	4	4	223 / 411	0.542579	11.4	381	6.1854
SF3B3_IPI:IPI00300371.5	SF3B3	SF3B3	4	4	173 / 411	0.420925	12.9	224	5.42993
AGK_IPI:IPI00019353.4	AGK	AGK	4	4	16 / 411	0.0389294	1.6	4	0.0622871
ACTB_IPI:IPI00021439.1	ACTB	ACTB	4	7	363 / 411	0.883212	36.4	716	32.1489
TMPO_IPI:IPI00030131.3	TMPO	TMPO	4	6	127 / 411	0.309002	13.6	78	4.20243
TUBA1C_IPI:IPI00166768.3	TUBA1C	TUBA1C	4	15	389 / 411	0.946472	37	281	35.0195
RPS7_IPI:IPI00013415.1	RPS7	RPS7	4	7	200 / 411	0.486618	5.9	27	2.87105
SLC25A1_IPI:IPI00294159.3	SLC25A1	SLC25A1	4	5	42 / 411	0.10219	3.4	14	0.347445
NDUFS3_IPI:IPI00025796.3	NDUFS3	NDUFS3	4	6	19 / 411	0.0462287	2.3	9	0.106326
SAMM50_IPI:IPI00412713.4	SAMM50	SAMM50	4	4	8 / 411	0.0194647	3.6	12	0.070073
C22orf28_IPI:IPI00550689.3	C22ORF28	Invalid identifier / gene not available	4	5		0			0
COPA_IPI:IPI00295857.7	COPA	COPA	4	5	86 / 411	0.209246	4.8	58	1.00438
RPL7_IPI:IPI00030179.3	RPL7	RPL7	4	4	175 / 411	0.425791	7.3	66	3.10827
LOC348262_IPI:IPI00746221.2	LOC348262	Invalid identifier / gene not available	4	6		0			0
SUPT5H_IPI:IPI00298058.1	SUPT5H	SUPT5H	4	4	50 / 411	0.121655	5.1	47	0.620438
DPM1_IPI:IPI00022018.1	DPM1	DPM1	4	4	28 / 411	0.0681265	1.8	8	0.122628
ABCD3_IPI:IPI00002372.1	ABCD3	ABCD3	4	5	40 / 411	0.0973236	4	12	0.389294
PRMT5_IPI:IPI00064328.3	PRMT5	PRMT5	4	5	175 / 411	0.425791	156.6	2950	66.6788
NSUN2_IPI:IPI00306369.3	NSUN2	NSUN2	4	5	78 / 411	0.189781	3.6	19	0.683212
SFPQ_IPI:IPI00010740.1	SFPQ	SFPQ	4	4	201 / 411	0.489051	16.7	336	8.16715
MDN1_IPI:IPI00167941.1	MDN1	MDN1	4	4	27 / 411	0.0656934	2.4	8	0.157664
TUBB1_IPI:IPI00006510.1	TUBB1	TUBB1	4	9	291 / 411	0.708029	6.8	62	4.8146
MCCC1_IPI:IPI00024580.4	MCCC1	MCCC1	4	4	88 / 411	0.214112	44.2	272	9.46375
IQGAP1_IPI:IPI00009342.1	IQGAP1	IQGAP1	4	4	95 / 411	0.231144	5.8	55	1.34063
RPS8_IPI:IPI00216587.9	RPS8	RPS8	4	5	228 / 411	0.554745	7.4	51	4.10511
GIT2_IPI:IPI00186690.6	GIT2	GIT2	4	4	3 / 411	0.00729927	1	1	0.00729927
RPLP0_IPI:IPI00008530.1	RPLP0	RPLP0	4	4	206 / 411	0.501217	7.1	47	3.55864
EIF3G_IPI:IPI00290460.3	EIF3G	EIF3G	4	4	109 / 411	0.265207	4.3	38	1.14039
RPS16_IPI:IPI00221092.8	RPS16	RPS16	4	6	211 / 411	0.513382	5.9	42	3.02895
SRRT_IPI:IPI00220038.1	SRRT	SRRT	4	4	82 / 411	0.199513	6	43	1.19708
IPI:IPI00176692.7_IPI:IPI00176692.7	IPI:IPI00176692	Invalid identifier / gene not available	4	5		0			0
RPL26L1_IPI:IPI00007144.1	RPL26L1	RPL26L1	4	4	138 / 411	0.335766	4.3	19	1.4438
ATP1A2_IPI:IPI00003021.1	ATP1A2	ATP1A2	3	3	94 / 411	0.22871	3.4	42	0.777616
EIF2S2_IPI:IPI00021728.3	EIF2S2	EIF2S2	3	3	71 / 411	0.172749	1.9	7	0.328224
PSMC5_IPI:IPI00023919.4	PSMC5	PSMC5	3	3	116 / 411	0.282238	6.3	57	1.7781
HNRNPH1_IPI:IPI00013881.6	HNRNPH1	HNRNPH1	3	3	263 / 411	0.639903	13.7	201	8.76667
RPLP2_IPI:IPI00008529.1	RPLP2	RPLP2	3	3	215 / 411	0.523114	6.1	117	3.191
MARCKSL1_IPI:IPI00641181.5	MARCKSL1	MARCKSL1	3	3	52 / 411	0.126521	2.2	9	0.278345
SERPINA3_IPI:IPI00550991.3	SERPINA3	SERPINA3	3	6	0 / 411	0	0	0	0
IGF2BP1_IPI:IPI00008557.5	IGF2BP1	IGF2BP1	3	3	114 / 411	0.277372	6.5	50	1.80292
DDX17_IPI:IPI00023785.7	DDX17	DDX17	3	3	238 / 411	0.579075	8.4	80	4.86423
XRCC6_IPI:IPI00644712.4	XRCC6	XRCC6	3	3	176 / 411	0.428224	9	71	3.85401
COPG2_IPI:IPI00002557.1	COPG2	COPG2	3	3	67 / 411	0.163017	15.4	92	2.51046
CSE1L_IPI:IPI00022744.5	CSE1L	CSE1L	3	3	126 / 411	0.306569	7.1	54	2.17664
MARCKS_IPI:IPI00219301.7	MARCKS	MARCKS	3	3	95 / 411	0.231144	2.8	14	0.647202
DDX21_IPI:IPI00015953.3	DDX21	DDX21	3	3	179 / 411	0.435523	13.1	75	5.70535
SNAP23_IPI:IPI00010438.2	SNAP23	SNAP23	3	4	41 / 411	0.0997567	3.5	15	0.349148
XPO1_IPI:IPI00298961.3	XPO1	XPO1	3	3	95 / 411	0.231144	4	51	0.924574
RPL22_IPI:IPI00219153.4	RPL22	RPL22	3	3	192 / 411	0.467153	3.3	26	1.54161
UBAP2L_IPI:IPI00029019.6	UBAP2L	UBAP2L	3	3	129 / 411	0.313869	10.4	41	3.26423
HNRNPF_IPI:IPI00003881.5	HNRNPF	HNRNPF	3	5	243 / 411	0.591241	8.1	58	4.78905
MRPL37_IPI:IPI00162330.3	MRPL37	MRPL37	3	3	21 / 411	0.0510949	1.9	7	0.0970803
G3BP2_IPI:IPI00009057.2	G3BP2	G3BP2	3	3	59 / 411	0.143552	2.9	24	0.416302
CCT6A_IPI:IPI00027626.3	CCT6A	CCT6A	3	3	177 / 411	0.430657	15	153	6.45985
EFTUD2_IPI:IPI00003519.1	EFTUD2	EFTUD2	3	3	162 / 411	0.394161	10.8	82	4.25693
SLC1A5_IPI:IPI00019472.4	SLC1A5	SLC1A5	3	4	70 / 411	0.170316	2.9	13	0.493917
SLC25A11_IPI:IPI00219729.3	SLC25A11	SLC25A11	3	4	55 / 411	0.13382	3.1	18	0.414842
MCM7_IPI:IPI00219740.3	MCM7	MCM7	3	3	123 / 411	0.29927	7.2	59	2.15474
RPL31_IPI:IPI00026302.3	RPL31	RPL31	3	4	170 / 411	0.413625	3.2	21	1.3236
EPS15_IPI:IPI00292134.6	EPS15	EPS15	3	3	28 / 411	0.0681265	3.3	11	0.224818
APOB_IPI:IPI00022229.1	APOB	APOB	3	3	11 / 411	0.026764	4.1	8	0.109732
PSMD3_IPI:IPI00011603.2	PSMD3	PSMD3	3	3	111 / 411	0.270073	6.2	34	1.67445
LUC7L2_IPI:IPI00006932.4	LUC7L2	C7orf55-LUC7L2	3	3	151 / 411	0.367397	15.8	106	5.80487
RPL13_IPI:IPI00465361.4	RPL13	RPL13	3	4	218 / 411	0.530414	5.4	49	2.86423
RPL18_IPI:IPI00215719.6	RPL18	RPL18	3	3	191 / 411	0.46472	5.3	64	2.46302
IGHG1_IPI:IPI00384938.1	IGHG1	Invalid identifier / gene not available	3	3		0			0
RPL5_IPI:IPI00000494.6	RPL5	RPL5	3	3	156 / 411	0.379562	6.8	55	2.58102
SND1_IPI:IPI00140420.4	SND1	SND1	3	3	118 / 411	0.287105	8	55	2.29684
RBM39_IPI:IPI00163505.2	RBM39	RBM39	3	3	163 / 411	0.396594	11.1	85	4.40219
COPB2_IPI:IPI00220219.6	COPB2	COPB2	3	3	79 / 411	0.192214	3.6	23	0.691971
HSPA7_IPI:IPI00011134.2	HSPA7	Invalid identifier / gene not available	3	5		0			0
UBC_IPI:IPI00179330.6	UBC	UBC	3	6	233 / 411	0.56691	6.5	90	3.68491
ATAD3A_IPI:IPI00295992.4	ATAD3A	ATAD3A	3	3	87 / 411	0.211679	5.9	75	1.24891
DARS_IPI:IPI00216951.2	DARS	DARS	3	3	121 / 411	0.294404	5	35	1.47202
MYH9_IPI:IPI00019502.3	MYH9	MYH9	3	3	203 / 411	0.493917	32.8	670	16.2005
PRPF40A_IPI:IPI00337385.3	PRPF40A	PRPF40A	3	3	76 / 411	0.184915	5.9	30	1.091
RPL8_IPI:IPI00012772.8	RPL8	RPL8	3	4	157 / 411	0.381995	6	42	2.29197
GK_IPI:IPI00027424.3	GK	GK	3	4	6 / 411	0.0145985	1.7	3	0.0248175
SNRPD2_IPI:IPI00017963.1	SNRPD2	SNRPD2	3	3	173 / 411	0.420925	4.9	40	2.06253
ATP5C1_IPI:IPI00395769.2	ATP5C1	ATP5C1	3	3	68 / 411	0.16545	3.2	20	0.52944
SMC4_IPI:IPI00328298.6	SMC4	SMC4	3	3	90 / 411	0.218978	5.2	26	1.13869
RPS25_IPI:IPI00012750.3	RPS25	RPS25	3	3	196 / 411	0.476886	4.4	20	2.0983
RUVBL1_IPI:IPI00021187.4	RUVBL1	RUVBL1	3	3	152 / 411	0.36983	12.4	75	4.58589
MYO1C_IPI:IPI00010418.5	MYO1C	MYO1C	3	3	66 / 411	0.160584	10.7	69	1.71825
PCMT1_IPI:IPI00411680.9	PCMT1	PCMT1	3	3	119 / 411	0.289538	6.9	53	1.99781
HNRNPA2B1_IPI:IPI00386854.6	HNRNPA2B1	HNRNPA2B1	3	3	262 / 411	0.63747	11.3	67	7.20341
PGAM5_IPI:IPI00063242.5	PGAM5	PGAM5	3	4	73 / 411	0.177616	5.2	29	0.923601
VIM_IPI:IPI00418471.6	VIM	VIM	3	3	257 / 411	0.625304	39.5	754	24.6995
CDC2_IPI:IPI00026689.4	CDC2	Invalid identifier / gene not available	3	3		0			0
MYBBP1A_IPI:IPI00005024.3	MYBBP1A	MYBBP1A	3	3	112 / 411	0.272506	8.6	51	2.34355
C14orf156_IPI:IPI00009922.3	C14ORF156	Invalid identifier / gene not available	3	3		0			0
ILK-2_IPI:IPI00302927.6	ILK-2	Invalid identifier / gene not available	3	3		0			0
ARL1_IPI:IPI00219518.7	ARL1	ARL1	3	3	28 / 411	0.0681265	1.5	5	0.10219
OAT_IPI:IPI00022334.1	OAT	OAT	3	3	95 / 411	0.231144	4.4	44	1.01703
PRDX1_IPI:IPI00000874.1	PRDX1	PRDX1	3	3	253 / 411	0.615572	7.9	45	4.86302
PRPF8_IPI:IPI00007928.4	PRPF8	PRPF8	3	3	161 / 411	0.391727	15	117	5.87591
RPS6_IPI:IPI00021840.1	RPS6	RPS6	3	4	208 / 411	0.506083	6.2	63	3.13771
DDX1_IPI:IPI00293655.3	DDX1	DDX1	3	3	125 / 411	0.304136	5.7	34	1.73358
GLUD1_IPI:IPI00016801.1	GLUD1	GLUD1	3	3	90 / 411	0.218978	4.2	27	0.919708
RANP1_IPI:IPI00643041.3	RANP1	Invalid identifier / gene not available	3	3		0			0
THRAP3_IPI:IPI00104050.3	THRAP3	THRAP3	3	3	178 / 411	0.43309	17.7	176	7.66569
SLC25A12_IPI:IPI00386271.4	SLC25A12	SLC25A12	3	3	20 / 411	0.0486618	2.7	13	0.131387
CDC5L_IPI:IPI00465294.2	CDC5L	CDC5L	3	3	79 / 411	0.192214	13	48	2.49878
RPL35A_IPI:IPI00029731.8	RPL35A	RPL35A	3	4	108 / 411	0.262774	3.8	23	0.99854
YWHAE_IPI:IPI00000816.1	YWHAE	YWHAE	3	3	186 / 411	0.452555	9.4	90	4.25401
CCT7_IPI:IPI00018465.1	CCT7	CCT7	3	3	172 / 411	0.418491	14.6	118	6.10998
ATP5B_IPI:IPI00303476.1	ATP5B	ATP5B	3	3	211 / 411	0.513382	10	106	5.13382
MAP7_IPI:IPI00020771.2	MAP7	MAP7	3	3	42 / 411	0.10219	2.6	10	0.265693
FARSA_IPI:IPI00031820.3	FARSA	FARSA	3	3	60 / 411	0.145985	2.9	11	0.423358
EEF1A2_IPI:IPI00014424.1	EEF1A2	EEF1A2	3	5	343 / 411	0.83455	13.4	175	11.183
MCM5_IPI:IPI00018350.3	MCM5	MCM5	3	3	100 / 411	0.243309	5	34	1.21655
MCM4_IPI:IPI00018349.5	MCM4	MCM4	3	3	113 / 411	0.274939	5.9	42	1.62214
RAVER1_IPI:IPI00217661.4	RAVER1	RAVER1	3	3	42 / 411	0.10219	1.9	18	0.194161
EIF3B_IPI:IPI00396370.6	EIF3B	EIF3B	3	3	108 / 411	0.262774	5.4	42	1.41898
RPL12_IPI:IPI00024933.3	RPL12	RPL12	3	3	201 / 411	0.489051	4.9	30	2.39635
RPL36_IPI:IPI00216237.5	RPL36	RPL36	3	3	93 / 411	0.226277	2.8	9	0.633577
FANCI_IPI:IPI00019447.6	FANCI	FANCI	3	3	33 / 411	0.080292	2.3	8	0.184672
RPS11_IPI:IPI00025091.3	RPS11	RPS11	3	3	151 / 411	0.367397	4.3	22	1.57981
ATP2A1_IPI:IPI00024804.3	ATP2A1	ATP2A1	3	3	59 / 411	0.143552	2.4	16	0.344526
RPS13_IPI:IPI00221089.5	RPS13	RPS13	3	3	158 / 411	0.384428	4.5	17	1.72993
LBR_IPI:IPI00292135.1	LBR	LBR	3	3	54 / 411	0.131387	5.7	24	0.748905
RTN4_IPI:IPI00021766.5	RTN4	RTN4	2	2	64 / 411	0.155718	3.8	16	0.591727
SERPINA1_IPI:IPI00553177.1	SERPINA1	SERPINA1	2	2	2 / 411	0.00486618	2	3	0.00973236
U2AF2_IPI:IPI00031556.7	U2AF2	U2AF2	2	4	124 / 411	0.301703	4.2	21	1.26715
RPL19_IPI:IPI00025329.1	RPL19	RPL19	2	4	210 / 411	0.510949	3.8	67	1.94161
ECSIT_IPI:IPI00106506.2	ECSIT	ECSIT	2	2	0 / 411	0	0	0	0
FKBP8_IPI:IPI00328161.8	FKBP8	FKBP8	2	3	21 / 411	0.0510949	1.6	4	0.0817518
SERPINA1_IPI:IPI00305457.5	SERPINA1	SERPINA1	2	3	2 / 411	0.00486618	2	3	0.00973236
SSR1_IPI:IPI00301021.3	SSR1	SSR1	2	2	19 / 411	0.0462287	1.5	4	0.0693431
LRRC59_IPI:IPI00396321.1	LRRC59	LRRC59	2	2	80 / 411	0.194647	2.4	6	0.467153
RPL11_IPI:IPI00376798.3	RPL11	RPL11	2	3	209 / 411	0.508516	3.7	20	1.88151
PCCB_IPI:IPI00007247.4	PCCB	PCCB	2	2	93 / 411	0.226277	48.4	263	10.9518
MRPS18B_IPI:IPI00022316.3	MRPS18B	MRPS18B	2	2	27 / 411	0.0656934	1.9	6	0.124818
RPL10P16_IPI:IPI00374260.4	RPL10P16	Invalid identifier / gene not available	2	2		0			0
SLC16A1_IPI:IPI00024650.1	SLC16A1	SLC16A1	2	2	47 / 411	0.114355	2.4	7	0.274453
POLDIP3_IPI:IPI00429180.1	POLDIP3	POLDIP3	2	2	79 / 411	0.192214	6.2	27	1.19173
GFPT1_IPI:IPI00217952.6	GFPT1	GFPT1	2	2	15 / 411	0.0364964	2.8	16	0.10219
MSH6_IPI:IPI00106847.3	MSH6	MSH6	2	2	56 / 411	0.136253	3.1	19	0.422384
ERLIN2_IPI:IPI00026942.5	ERLIN2	ERLIN2	2	3	45 / 411	0.109489	2.2	23	0.240876
FAR1_IPI:IPI00386139.1	FAR1	FAR1	2	2	14 / 411	0.0340633	1.4	4	0.0476886
FASN_IPI:IPI00026781.2	FASN	FASN	2	2	167 / 411	0.406326	49.4	548	20.0725
GC_IPI:IPI00555812.4	GC	GC	2	3	0 / 411	0	0	0	0
EIF3E_IPI:IPI00013068.1	EIF3E	EIF3E	2	2	96 / 411	0.233577	3.6	30	0.840876
IKBKAP_IPI:IPI00293735.2	IKBKAP	IKBKAP	2	2	36 / 411	0.0875912	2.1	15	0.183942
YWHAZ_IPI:IPI00021263.3	YWHAZ	YWHAZ	2	3	180 / 411	0.437956	6	36	2.62774
GRAMD1A_IPI:IPI00168347.7	GRAMD1A	GRAMD1A	2	2	9 / 411	0.0218978	2.1	4	0.0459854
PHGDH_IPI:IPI00011200.5	PHGDH	PHGDH	2	2	152 / 411	0.36983	6.2	40	2.29294
AKAP8L_IPI:IPI00297455.5	AKAP8L	AKAP8L	2	2	34 / 411	0.0827251	1.6	5	0.13236
SPTLC1_IPI:IPI00005745.1	SPTLC1	SPTLC1	2	2	12 / 411	0.0291971	1.4	3	0.0408759
SLC27A4_IPI:IPI00101335.2	SLC27A4	SLC27A4	2	2	2 / 411	0.00486618	1	1	0.00486618
HSDL2_IPI:IPI00031107.1	HSDL2	HSDL2	2	2	15 / 411	0.0364964	3	8	0.109489
RPL3_IPI:IPI00550021.4	RPL3	RPL3	2	3	163 / 411	0.396594	10.5	142	4.16423
MARS_IPI:IPI00008240.2	MARS	MARS	2	2	107 / 411	0.260341	6.3	30	1.64015
PSMC6_IPI:IPI00021926.4	PSMC6	PSMC6	2	2	89 / 411	0.216545	3.8	32	0.822871
DNAJA3_IPI:IPI00179187.3	DNAJA3	DNAJA3	2	2	33 / 411	0.080292	1.8	4	0.144526
RPL7A_IPI:IPI00299573.1	RPL7A	RPL7A	2	3	197 / 411	0.479319	6.8	48	3.25937
IPI:IPI00550731.2_IPI:IPI00550731.2	IPI:IPI00550731	Invalid identifier / gene not available	2	2		0			0
HSP90AB1_IPI:IPI00411633.4	HSP90AB1	HSP90AB1	2	2	277 / 411	0.673966	30.7	278	20.6908
TAF15_IPI:IPI00020194.1	TAF15	TAF15	2	3	163 / 411	0.396594	4.9	35	1.94331
GAPDH_IPI:IPI00219018.7	GAPDH	GAPDH	2	2	248 / 411	0.603406	13	97	7.84428
NUP93_IPI:IPI00397904.6	NUP93	NUP93	2	2	58 / 411	0.141119	3.8	17	0.536253
NACA_IPI:IPI00023748.3	NACA	NACA	2	2	125 / 411	0.304136	2.4	11	0.729927
PPP2R5E_IPI:IPI00002853.1	PPP2R5E	PPP2R5E	2	2	0 / 411	0	0	0	0
DPF2_IPI:IPI00023322.1	DPF2	DPF2	2	2	7 / 411	0.0170316	1.4	3	0.0238443
THOC4_IPI:IPI00328840.9	THOC4	Invalid identifier / gene not available	2	2		0			0
MSH2_IPI:IPI00017303.1	MSH2	MSH2	2	2	45 / 411	0.109489	3	27	0.328467
ERLIN1_IPI:IPI00007940.6	ERLIN1	ERLIN1	2	2	29 / 411	0.0705596	1.8	9	0.127007
LSM12_IPI:IPI00410324.2	LSM12	LSM12	2	4	80 / 411	0.194647	2.7	13	0.525547
ELAVL1_IPI:IPI00301936.4	ELAVL1	ELAVL1	2	3	101 / 411	0.245742	4.4	19	1.08127
SKP1_IPI:IPI00172421.7	SKP1	SKP1	2	2	145 / 411	0.352798	3.2	63	1.12895
SGPL1_IPI:IPI00099463.2	SGPL1	SGPL1	2	2	10 / 411	0.0243309	1.2	2	0.0291971
SPTLC2_IPI:IPI00005751.1	SPTLC2	SPTLC2	2	2	1 / 411	0.00243309	2	2	0.00486618
ANXA2_IPI:IPI00418169.3	ANXA2	ANXA2	2	2	150 / 411	0.364964	7.8	54	2.84672
EEF1G_IPI:IPI00000875.7	EEF1G	EEF1G	2	2	193 / 411	0.469586	7.6	41	3.56886
GTF2I_IPI:IPI00054042.1	GTF2I	GTF2I	2	2	141 / 411	0.343066	14	71	4.80292
EPRS_IPI:IPI00013452.9	EPRS	EPRS	2	2	157 / 411	0.381995	11.5	68	4.39294
PPP2R1B_IPI:IPI00294178.2	PPP2R1B	PPP2R1B	2	2	77 / 411	0.187348	2	10	0.374696
LARP1_IPI:IPI00185919.3	LARP1	LARP1	2	2	78 / 411	0.189781	12.1	46	2.29635
HNRNPL_IPI:IPI00027834.3	HNRNPL	HNRNPL	2	2	190 / 411	0.462287	11.3	236	5.22384
SNRNP70_IPI:IPI00219483.1	SNRNP70	SNRNP70	2	2	108 / 411	0.262774	5.1	52	1.34015
UNC119B_IPI:IPI00414629.2	UNC119B	UNC119B	2	2	4 / 411	0.00973236	1	1	0.00973236
SNRPE_IPI:IPI00029266.1	SNRPE	SNRPE	2	2	93 / 411	0.226277	2.2	11	0.49781
ATXN10_IPI:IPI00001636.1	ATXN10	ATXN10	2	2	26 / 411	0.0632603	1.7	4	0.107543
PARP1_IPI:IPI00449049.5	PARP1	PARP1	2	2	182 / 411	0.442822	11.8	151	5.2253
TXN_IPI:IPI00216298.6	TXN	TXN	2	2	174 / 411	0.423358	2.6	10	1.10073
COPG_IPI:IPI00783982.1	COPG	COPG1	2	2	78 / 411	0.189781	3.2	19	0.607299
KIF5B_IPI:IPI00012837.1	KIF5B	KIF5B	2	2	97 / 411	0.23601	8.3	48	1.95888
PCNA_IPI:IPI00021700.3	PCNA	PCNA	2	2	97 / 411	0.23601	4.8	23	1.13285
RPL15_IPI:IPI00470528.5	RPL15	RPL15	2	2	149 / 411	0.36253	6.6	30	2.3927
C14orf166_IPI:IPI00006980.1	C14ORF166	C14orf166	2	2	92 / 411	0.223844	3.7	15	0.828224
RPL24_IPI:IPI00306332.4	RPL24	RPL24	2	2	195 / 411	0.474453	4.1	22	1.94526
RBBP4_IPI:IPI00328319.8	RBBP4	RBBP4	2	2	148 / 411	0.360097	4	22	1.44039
PLK1_IPI:IPI00021248.1	PLK1	PLK1	2	2	14 / 411	0.0340633	1.9	3	0.0647202
KPNB1_IPI:IPI00001639.2	KPNB1	KPNB1	2	2	161 / 411	0.391727	9.5	62	3.72141
SFRS5_IPI:IPI00012341.1	SFRS5	SRSF5	2	2	112 / 411	0.272506	2.1	15	0.572263
BCLAF1_IPI:IPI00006079.1	BCLAF1	BCLAF1	2	2	171 / 411	0.416058	15.6	106	6.49051
TRIP13_IPI:IPI00003505.3	TRIP13	TRIP13	2	2	27 / 411	0.0656934	2.2	7	0.144526
SARS2_IPI:IPI00328361.7	SARS2	SARS2	2	2	31 / 411	0.0754258	2	11	0.150852
CHCHD3_IPI:IPI00015833.1	CHCHD3	CHCHD3	2	2	16 / 411	0.0389294	4.6	31	0.179075
SNRNP200_IPI:IPI00420014.2	SNRNP200	SNRNP200	2	2	146 / 411	0.355231	16.7	112	5.93236
EIF2S1_IPI:IPI00219678.3	EIF2S1	EIF2S1	2	2	101 / 411	0.245742	2.3	10	0.565207
HSP90AA2_IPI:IPI00031523.4	HSP90AA2	Invalid identifier / gene not available	2	3		0			0
IPO5_IPI:IPI00514205.2	IPO5	IPO5	2	2	80 / 411	0.194647	4.5	30	0.875912
IPI:IPI00069693.4_IPI:IPI00069693.4	IPI:IPI00069693	Invalid identifier / gene not available	2	2		0			0
ALDH3A2_IPI:IPI00333619.4	ALDH3A2	ALDH3A2	2	2	29 / 411	0.0705596	2.3	12	0.162287
PNKD_IPI:IPI00001022.5	PNKD	PNKD	2	2	10 / 411	0.0243309	1.3	2	0.0316302
RUVBL2_IPI:IPI00009104.7	RUVBL2	RUVBL2	2	2	141 / 411	0.343066	10.4	93	3.56788
PNMA2_IPI:IPI00027028.1	PNMA2	PNMA2	2	2	6 / 411	0.0145985	2	5	0.0291971
RAB18_IPI:IPI00014577.1	RAB18	RAB18	2	2	12 / 411	0.0291971	1.6	4	0.0467153
STOML2_IPI:IPI00334190.4	STOML2	STOML2	2	2	32 / 411	0.0778589	3.3	20	0.256934
RPL38_IPI:IPI00215790.6	RPL38	RPL38	2	3	139 / 411	0.3382	9	58	3.0438
LETM1_IPI:IPI00017592.1	LETM1	LETM1	2	2	18 / 411	0.0437956	1.6	9	0.070073
NUP205_IPI:IPI00783781.1	NUP205	NUP205	2	2	37 / 411	0.0900243	4.1	25	0.3691
RPL17_IPI:IPI00413324.6	RPL17	RPL17-C18orf32	2	3	190 / 411	0.462287	4.6	29	2.12652
C16orf14_IPI:IPI00042604.3	C16ORF14	Invalid identifier / gene not available	2	2		0			0
HSPH1_IPI:IPI00218993.1	HSPH1	HSPH1	2	2	119 / 411	0.289538	6	25	1.73723
SLC25A21_IPI:IPI00012690.1	SLC25A21	SLC25A21	2	2	0 / 411	0	0	0	0
XPO5_IPI:IPI00549861.4	XPO5	XPO5	2	2	45 / 411	0.109489	2.3	27	0.251825
HNRNPA0_IPI:IPI00011913.1	HNRNPA0	HNRNPA0	2	2	164 / 411	0.399027	4.3	31	1.71582
RHBDD2_IPI:IPI00010255.3	RHBDD2	RHBDD2	2	2	8 / 411	0.0194647	1.1	2	0.0214112
RPS20_IPI:IPI00012493.1	RPS20	RPS20	2	2	179 / 411	0.435523	3.6	23	1.56788
EIF4B_IPI:IPI00012079.3	EIF4B	EIF4B	2	2	167 / 411	0.406326	20.3	174	8.24842
PAWR_IPI:IPI00001871.2	PAWR	PAWR	2	2	27 / 411	0.0656934	1.4	4	0.0919708
CLPTM1L_IPI:IPI00151358.2	CLPTM1L	CLPTM1L	2	2	10 / 411	0.0243309	1.1	2	0.026764
ATP6V1H_IPI:IPI00296191.1	ATP6V1H	ATP6V1H	2	2	18 / 411	0.0437956	1.2	3	0.0525547
STT3A_IPI:IPI00297492.2	STT3A	STT3A	2	2	23 / 411	0.0559611	1.7	7	0.0951338
BAG2_IPI:IPI00000643.1	BAG2	BAG2	2	2	96 / 411	0.233577	2.9	20	0.677372
LOC442497_IPI:IPI00027493.1	LOC442497	Invalid identifier / gene not available	2	2		0			0
SNRPA_IPI:IPI00012382.3	SNRPA	SNRPA	2	2	68 / 411	0.16545	2.6	42	0.43017
SEC22B_IPI:IPI00006865.3	SEC22B	Invalid identifier / gene not available	2	2		0			0
EIF2S3_IPI:IPI00297982.7	EIF2S3	EIF2S3	2	2	91 / 411	0.221411	3.6	13	0.79708
PSMD1_IPI:IPI00299608.3	PSMD1	PSMD1	2	2	102 / 411	0.248175	6.8	31	1.68759
RBM25_IPI:IPI00004273.6	RBM25	RBM25	2	2	77 / 411	0.187348	7.7	44	1.44258
GARS_IPI:IPI00783097.3	GARS	GARS	2	2	50 / 411	0.121655	3.1	21	0.377129
TIMM17B_IPI:IPI00219833.2	TIMM17B	TIMM17B	2	2	1 / 411	0.00243309	1	1	0.00243309
CCT5_IPI:IPI00010720.1	CCT5	CCT5	2	2	182 / 411	0.442822	17.9	119	7.92652
NDUFA5_IPI:IPI00412545.4	NDUFA5	NDUFA5	2	2	13 / 411	0.0316302	1.2	2	0.0379562
SMN2_IPI:IPI00003394.1	SMN2	SMN2	2	2	49 / 411	0.119221	1.6	4	0.190754
COPB1_IPI:IPI00295851.4	COPB1	COPB1	2	2	92 / 411	0.223844	3.1	18	0.693917
PABPN1_IPI:IPI00005792.2	PABPN1	PABPN1	2	2	50 / 411	0.121655	2.4	8	0.291971
ACTA2_IPI:IPI00008603.1	ACTA2	ACTA2	2	2	351 / 411	0.854015	18.6	294	15.8847
DDX46_IPI:IPI00329791.9	DDX46	DDX46	2	2	125 / 411	0.304136	22.9	85	6.96472
MYH10_IPI:IPI00397526.3	MYH10	MYH10	2	2	166 / 411	0.403893	15.7	205	6.34112
C3_IPI:IPI00783987.2	C3	C3	2	2	27 / 411	0.0656934	5.2	17	0.341606
RPL13A_IPI:IPI00304612.9	RPL13A	RPL13A	2	3	144 / 411	0.350365	5.1	65	1.78686
GCN1L1_IPI:IPI00001159.1	GCN1L1	GCN1L1	2	2	104 / 411	0.253041	11.4	105	2.88467
PCCA_IPI:IPI00552419.2	PCCA	PCCA	2	2	94 / 411	0.22871	67.1	342	15.3465
SF3B3_IPI:IPI00179138.3	SF3B3	SF3B3	2	2	173 / 411	0.420925	12.9	224	5.42993
RAD50_IPI:IPI00107531.1	RAD50	RAD50	2	2	43 / 411	0.104623	8.4	40	0.878832
RPL10A_IPI:IPI00412579.6	RPL10A	RPL10A	2	2	117 / 411	0.284672	6.8	39	1.93577
GBF1_IPI:IPI00021954.1	GBF1	GBF1	2	2	6 / 411	0.0145985	1.5	4	0.0218978
EXOC7_IPI:IPI00172532.1	EXOC7	EXOC7	2	2	6 / 411	0.0145985	1.2	2	0.0175182
ALDH18A1_IPI:IPI00008982.1	ALDH18A1	ALDH18A1	2	2	93 / 411	0.226277	7.6	57	1.71971
KIAA0368_IPI:IPI00157790.7	KIAA0368	KIAA0368	2	2	26 / 411	0.0632603	2.3	12	0.145499
RPS7P4_IPI:IPI00008293.4	RPS7P4	Invalid identifier / gene not available	2	4		0			0
HSPD1_IPI:IPI00076042.2	HSPD1	HSPD1	2	2	231 / 411	0.562044	17.9	165	10.0606
HADHA_IPI:IPI00031522.2	HADHA	HADHA	2	2	72 / 411	0.175182	6.8	39	1.19124
AASS_IPI:IPI00033217.3	AASS	AASS	2	2	9 / 411	0.0218978	1.7	6	0.0372263
GNB2_IPI:IPI00003348.3	GNB2	GNB2	2	2	63 / 411	0.153285	3.6	21	0.551825
EIF3I_IPI:IPI00012795.3	EIF3I	EIF3I	2	2	128 / 411	0.311436	5.8	39	1.80633
KIAA0564_IPI:IPI00158296.5	KIAA0564	Invalid identifier / gene not available	2	2		0			0
GPSN2_IPI:IPI00100656.3	GPSN2	Invalid identifier / gene not available	2	2		0			0
STRBP_IPI:IPI00169430.2	STRBP	STRBP	2	2	69 / 411	0.167883	3.1	15	0.520438
RPL13P12_IPI:IPI00397611.2	RPL13P12	Invalid identifier / gene not available	2	3		0			0
LEMD2_IPI:IPI00168336.1	LEMD2	LEMD2	2	2	5 / 411	0.0121655	2.4	7	0.0291971
RAB1A_IPI:IPI00005719.1	RAB1A	RAB1A	2	2	69 / 411	0.167883	3.9	16	0.654745
DENND4C_IPI:IPI00478744.3	DENND4C	DENND4C	1	1	13 / 411	0.0316302	1.5	3	0.0474453
TUBA1A_IPI:IPI00180675.4	TUBA1A	TUBA1A	1	1	389 / 411	0.946472	34.9	299	33.0319
CFL1_IPI:IPI00012011.6	CFL1	CFL1	1	1	196 / 411	0.476886	4.2	30	2.00292
TOMM22_IPI:IPI00024976.5	TOMM22	TOMM22	1	1	24 / 411	0.0583942	2.7	6	0.157664
RBP4_IPI:IPI00022420.3	RBP4	RBP4	1	1	0 / 411	0	0	0	0
CLPTM1_IPI:IPI00396411.4	CLPTM1	CLPTM1	1	1	2 / 411	0.00486618	1	1	0.00486618
APOC2_IPI:IPI00021856.3	APOC2	APOC2	1	1	0 / 411	0	0	0	0
TUBA1C_IPI:IPI00218343.4	TUBA1C	TUBA1C	1	1	389 / 411	0.946472	37	281	35.0195
SERBP1_IPI:IPI00412714.3	SERBP1	SERBP1	1	1	175 / 411	0.425791	12	107	5.10949
IARS_IPI:IPI00644127.2	IARS	IARS	1	1	106 / 411	0.257908	7.4	65	1.90852
SLC25A10_IPI:IPI00015920.2	SLC25A10	SLC25A10	1	1	32 / 411	0.0778589	3.1	16	0.241363
DENND4C_IPI:IPI00514187.2	DENND4C	DENND4C	1	1	13 / 411	0.0316302	1.5	3	0.0474453
PKM2_IPI:IPI00479186.7	PKM2	PKM	1	1	249 / 411	0.605839	17.7	181	10.7234
TIMM23_IPI:IPI00007309.1	TIMM23	TIMM23	1	1	14 / 411	0.0340633	1.6	6	0.0545012
PSMC4_IPI:IPI00020042.2	PSMC4	PSMC4	1	1	97 / 411	0.23601	4.3	32	1.01484
CIRBP_IPI:IPI00180954.4	CIRBP	CIRBP	1	1	107 / 411	0.260341	8.2	35	2.13479
NECAP1_IPI:IPI00170916.1	NECAP1	NECAP1	1	1	0 / 411	0	0	0	0
SV2A_IPI:IPI00644025.1	SV2A	SV2A	1	1	0 / 411	0	0	0	0
MCM7_IPI:IPI00299904.3	MCM7	MCM7	1	1	123 / 411	0.29927	7.2	59	2.15474
DLST_IPI:IPI00384122.5	DLST	DLST	1	1	57 / 411	0.138686	3.7	20	0.513139
ANGEL1_IPI:IPI00298147.5	ANGEL1	ANGEL1	1	1	0 / 411	0	0	0	0
HAT1_IPI:IPI00024719.1	HAT1	HAT1	1	1	41 / 411	0.0997567	1.9	10	0.189538
LSM14A_IPI:IPI00410590.5	LSM14A	LSM14A	1	1	113 / 411	0.274939	6.6	30	1.8146
FAM98A_IPI:IPI00174442.2	FAM98A	FAM98A	1	1	43 / 411	0.104623	2.3	17	0.240633
MRPS27_IPI:IPI00022002.6	MRPS27	MRPS27	1	1	31 / 411	0.0754258	2.6	9	0.196107
RER1_IPI:IPI00005728.2	RER1	RER1	1	1	2 / 411	0.00486618	1	1	0.00486618
EIF3H_IPI:IPI00647650.3	EIF3H	EIF3H	1	1	83 / 411	0.201946	2.7	14	0.545255
EIF3K_IPI:IPI00033143.1	EIF3K	EIF3K	1	1	58 / 411	0.141119	1.5	5	0.211679
FASTKD2_IPI:IPI00013735.1	FASTKD2	FASTKD2	1	1	10 / 411	0.0243309	3.7	6	0.0900243
RPL9_IPI:IPI00031691.1	RPL9	RPL9	1	1	167 / 411	0.406326	5.7	68	2.31606
NDUFB11_IPI:IPI00472058.1	NDUFB11	NDUFB11	1	1	6 / 411	0.0145985	1.2	2	0.0175182
HPX_IPI:IPI00022488.1	HPX	HPX	1	1	3 / 411	0.00729927	1.3	2	0.00948905
LOC100131813_IPI:IPI00886929.1	LOC100131813	Invalid identifier / gene not available	1	1		0			0
RPL14_IPI:IPI00555744.6	RPL14	RPL14	1	1	156 / 411	0.379562	4.4	33	1.67007
FAM62A_IPI:IPI00022143.3	FAM62A	Invalid identifier / gene not available	1	1		0			0
Magmas_IPI:IPI00218463.3	MAGMAS	Invalid identifier / gene not available	1	1		0			0
NUDT21_IPI:IPI00646917.1	NUDT21	NUDT21	1	1	119 / 411	0.289538	4.5	20	1.30292
PFKL_IPI:IPI00332371.9	PFKL	PFKL	1	1	67 / 411	0.163017	3.4	30	0.554258
LEMD3_IPI:IPI00032491.1	LEMD3	LEMD3	1	1	12 / 411	0.0291971	1.5	2	0.0437956
SRPRB_IPI:IPI00295098.3	SRPRB	SRPRB	1	1	35 / 411	0.0851582	1.7	5	0.144769
RPS24_IPI:IPI00029750.1	RPS24	RPS24	1	1	179 / 411	0.435523	4.7	36	2.04696
LSM2_IPI:IPI00032460.3	LSM2	LSM2	1	1	36 / 411	0.0875912	1.8	4	0.157664
CDC42_IPI:IPI00016786.1	CDC42	CDC42	1	1	80 / 411	0.194647	2.7	9	0.525547
NCAPH_IPI:IPI00299507.6	NCAPH	NCAPH	1	1	64 / 411	0.155718	4.4	15	0.685158
ASPH_IPI:IPI00024572.3	ASPH	ASPH	1	1	14 / 411	0.0340633	1.9	4	0.0647202
HNRNPD_IPI:IPI00028888.1	HNRNPD	HNRNPD	1	1	216 / 411	0.525547	4.2	28	2.2073
CBARA1_IPI:IPI00295598.4	CBARA1	Invalid identifier / gene not available	1	1		0			0
STRAP_IPI:IPI00294536.2	STRAP	STRAP	1	1	93 / 411	0.226277	4.5	27	1.01825
SAPS3_IPI:IPI00019540.1	SAPS3	PPP6R3	1	1	37 / 411	0.0900243	2	9	0.180049
RPL29P30_IPI:IPI00052885.7	RPL29P30	Invalid identifier / gene not available	1	1		0			0
MTPAP_IPI:IPI00153051.5	MTPAP	MTPAP	1	1	12 / 411	0.0291971	1.4	3	0.0408759
COPE_IPI:IPI00399318.1	COPE	COPE	1	1	34 / 411	0.0827251	2	5	0.16545
MAT2A_IPI:IPI00010157.1	MAT2A	MAT2A	1	1	64 / 411	0.155718	1.9	9	0.295864
PFKM_IPI:IPI00219585.4	PFKM	PFKM	1	1	30 / 411	0.0729927	2.3	10	0.167883
TF_IPI:IPI00022463.1	TF	TF	1	1	7 / 411	0.0170316	4.3	13	0.073236
IPI:IPI00384397.1_IPI:IPI00384397.1	IPI:IPI00384397	Invalid identifier / gene not available	1	1		0			0
ACTBL2_IPI:IPI00003269.1	ACTBL2	ACTBL2	1	1	329 / 411	0.800487	9.1	129	7.28443
HNRNPAB_IPI:IPI00334587.1	HNRNPAB	HNRNPAB	1	1	206 / 411	0.501217	3.6	20	1.80438
HNRNPUL1_IPI:IPI00013070.2	HNRNPUL1	HNRNPUL1	1	1	106 / 411	0.257908	7.9	63	2.03747
WDR77_IPI:IPI00012202.1	WDR77	WDR77	1	1	162 / 411	0.394161	60.4	1143	23.8073
HNRPDL_IPI:IPI00011274.3	HNRPDL	Invalid identifier / gene not available	1	1		0			0
GNAI3_IPI:IPI00220578.3	GNAI3	GNAI3	1	1	53 / 411	0.128954	4.1	40	0.52871
HSPC152_IPI:IPI00009010.3	HSPC152	Invalid identifier / gene not available	1	1		0			0
ATP1A2_IPI:IPI00647102.4	ATP1A2	ATP1A2	1	1	94 / 411	0.22871	3.4	42	0.777616
ALKBH5_IPI:IPI00413659.4	ALKBH5	ALKBH5	1	1	12 / 411	0.0291971	1.1	2	0.0321168
GSN_IPI:IPI00026314.1	GSN	GSN	1	1	26 / 411	0.0632603	4	33	0.253041
BRI3BP_IPI:IPI00103599.1	BRI3BP	BRI3BP	1	1	5 / 411	0.0121655	1.2	2	0.0145985
CCT3_IPI:IPI00290770.3	CCT3	CCT3	1	1	165 / 411	0.40146	15.1	114	6.06204
C3orf1_IPI:IPI00299387.3	C3ORF1	Invalid identifier / gene not available	1	1		0			0
SCAMP3_IPI:IPI00306382.2	SCAMP3	SCAMP3	1	1	23 / 411	0.0559611	1.4	4	0.0783455
RPLP1_IPI:IPI00008527.3	RPLP1	RPLP1	1	1	180 / 411	0.437956	3.5	35	1.53285
RBM42_IPI:IPI00021626.2	RBM42	RBM42	1	1	24 / 411	0.0583942	1.6	3	0.0934307
XRCC5_IPI:IPI00220834.8	XRCC5	XRCC5	1	1	189 / 411	0.459854	7.3	71	3.35693
RPS23_IPI:IPI00218606.7	RPS23	RPS23	1	1	160 / 411	0.389294	4.7	28	1.82968
DNAJC11_IPI:IPI00027984.4	DNAJC11	DNAJC11	1	1	10 / 411	0.0243309	1.2	2	0.0291971
IPO4_IPI:IPI00156374.6	IPO4	IPO4	1	1	28 / 411	0.0681265	2.5	18	0.170316
SNRPF_IPI:IPI00220528.6	SNRPF	SNRPF	1	1	92 / 411	0.223844	1.9	9	0.425304
RCC2_IPI:IPI00465044.2	RCC2	RCC2	1	1	111 / 411	0.270073	5.2	33	1.40438
IPI:IPI00556589.3_IPI:IPI00556589.3	IPI:IPI00556589	Invalid identifier / gene not available	1	1		0			0
SKP1_IPI:IPI00301364.3	SKP1	SKP1	1	1	145 / 411	0.352798	3.2	63	1.12895
ECSIT_IPI:IPI00063188.1	ECSIT	ECSIT	1	1	0 / 411	0	0	0	0
HNRNPA1_IPI:IPI00215965.2	HNRNPA1	HNRNPA1	1	1	268 / 411	0.652068	9.2	68	5.99903
CLASP2_IPI:IPI00024382.6	CLASP2	CLASP2	1	1	48 / 411	0.116788	3.9	33	0.455474
MYL6_IPI:IPI00335168.9	MYL6	MYL6	1	1	190 / 411	0.462287	4.5	42	2.08029
IGKV3-20_IPI:IPI00030205.3	IGKV3-20	Invalid identifier / gene not available	1	1		0			0
FIP1L1_IPI:IPI00008449.1	FIP1L1	FIP1L1	1	1	84 / 411	0.20438	5.4	33	1.10365
ATXN2L_IPI:IPI00639962.1	ATXN2L	ATXN2L	1	1	127 / 411	0.309002	17.4	113	5.37664
IPI:IPI00164838.4_IPI:IPI00164838.4	IPI:IPI00164838	Invalid identifier / gene not available	1	1		0			0
C9orf78_IPI:IPI00550191.2	C9ORF78	C9orf78	1	1	10 / 411	0.0243309	1.2	2	0.0291971
EPB41L2_IPI:IPI00015973.1	EPB41L2	EPB41L2	1	1	51 / 411	0.124088	15.3	58	1.89854
CCDC47_IPI:IPI00024642.2	CCDC47	CCDC47	1	1	24 / 411	0.0583942	1.9	5	0.110949
KHDRBS1_IPI:IPI00008575.3	KHDRBS1	KHDRBS1	1	1	138 / 411	0.335766	3.5	53	1.17518
PPP2R1A_IPI:IPI00554737.3	PPP2R1A	PPP2R1A	1	1	132 / 411	0.321168	5.4	43	1.73431
LARP4B_IPI:IPI00514141.2	LARP4B	LARP4B	1	1	20 / 411	0.0486618	1.5	3	0.0729927
MRPL23_IPI:IPI00293476.3	MRPL23	MRPL23	1	1	14 / 411	0.0340633	1.1	2	0.0374696
WDR61_IPI:IPI00019269.3	WDR61	WDR61	1	1	48 / 411	0.116788	2.6	16	0.30365
GIGYF2_IPI:IPI00647635.3	GIGYF2	GIGYF2	1	1	45 / 411	0.109489	20.5	87	2.24453
FDFT1_IPI:IPI00020944.1	FDFT1	FDFT1	1	1	9 / 411	0.0218978	1	1	0.0218978
XRN2_IPI:IPI00100151.4	XRN2	XRN2	1	1	97 / 411	0.23601	3.5	20	0.826034
APOM_IPI:IPI00030739.1	APOM	APOM	1	1	0 / 411	0	0	0	0
PTCD3_IPI:IPI00783302.1	PTCD3	PTCD3	1	1	30 / 411	0.0729927	2.1	6	0.153285
EEF2_IPI:IPI00186290.6	EEF2	EEF2	1	1	207 / 411	0.50365	14.5	219	7.30292
SFRS7_IPI:IPI00003377.1	SFRS7	Invalid identifier / gene not available	1	1		0			0
SNRPD3_IPI:IPI00017964.1	SNRPD3	SNRPD3	1	1	176 / 411	0.428224	6.9	152	2.95474
AGAP3_IPI:IPI00163185.8	AGAP3	AGAP3	1	1	1 / 411	0.00243309	1	1	0.00243309
TOMM20_IPI:IPI00016676.1	TOMM20	TOMM20	1	1	5 / 411	0.0121655	1.2	2	0.0145985
AZGP1_IPI:IPI00166729.4	AZGP1	AZGP1	1	1	47 / 411	0.114355	2.9	15	0.33163
MRPS35_IPI:IPI00073779.1	MRPS35	MRPS35	1	1	25 / 411	0.0608273	1.4	3	0.0851582
AGPAT1_IPI:IPI00019141.1	AGPAT1	AGPAT1	1	1	4 / 411	0.00973236	1.8	2	0.0175182
U2AF1_IPI:IPI00005613.3	U2AF1	U2AF1	1	1	127 / 411	0.309002	3.4	14	1.05061
LRRC41_IPI:IPI00025516.1	LRRC41	LRRC41	1	1	4 / 411	0.00973236	1	1	0.00973236
PSMD4_IPI:IPI00022694.3	PSMD4	PSMD4	1	1	73 / 411	0.177616	3.3	11	0.586131
SSR4_IPI:IPI00019385.3	SSR4	SSR4	1	1	80 / 411	0.194647	2.9	9	0.564477
SSBP1_IPI:IPI00029744.1	SSBP1	SSBP1	1	1	78 / 411	0.189781	2.6	14	0.493431
GALK1_IPI:IPI00019383.2	GALK1	GALK1	1	1	12 / 411	0.0291971	3	8	0.0875912
PFDN2_IPI:IPI00006052.3	PFDN2	PFDN2	1	1	57 / 411	0.138686	2.3	8	0.318978
PLTP_IPI:IPI00022733.3	PLTP	PLTP	1	1	0 / 411	0	0	0	0
RPL36AP37_IPI:IPI00026230.1	RPL36AP37	Invalid identifier / gene not available	1	1		0			0
XRN1_IPI:IPI00328115.3	XRN1	XRN1	1	1	26 / 411	0.0632603	8.7	24	0.550365
LRRC47_IPI:IPI00170935.1	LRRC47	LRRC47	1	1	30 / 411	0.0729927	2.5	8	0.182482
IPI:IPI00742127.2_IPI:IPI00742127.2	IPI:IPI00742127	Invalid identifier / gene not available	1	1		0			0
PRPF19_IPI:IPI00004968.1	PRPF19	PRPF19	1	1	121 / 411	0.294404	7	33	2.06083
NONO_IPI:IPI00304596.3	NONO	NONO	1	1	220 / 411	0.53528	18.8	386	10.0633
LPCAT1_IPI:IPI00171626.3	LPCAT1	LPCAT1	1	1	7 / 411	0.0170316	1.4	4	0.0238443
CAPRIN1_IPI:IPI00783872.2	CAPRIN1	CAPRIN1	1	1	120 / 411	0.291971	4.6	44	1.34307
UTRN_IPI:IPI00009329.2	UTRN	UTRN	1	1	27 / 411	0.0656934	6.4	28	0.420438
MRPL12_IPI:IPI00005537.2	MRPL12	MRPL12	1	1	74 / 411	0.180049	1.9	9	0.342092
SAMHD1_IPI:IPI00294739.1	SAMHD1	SAMHD1	1	1	18 / 411	0.0437956	2.3	13	0.10073
ANKRD28_IPI:IPI00477505.3	ANKRD28	ANKRD28	1	1	14 / 411	0.0340633	1.6	4	0.0545012
CAND1_IPI:IPI00100160.3	CAND1	CAND1	1	1	88 / 411	0.214112	6.5	61	1.39173
TUBB2B_IPI:IPI00031370.3	TUBB2B	TUBB2B	1	1	372 / 411	0.905109	26.6	301	24.0759
IPI:IPI00911039.1_IPI:IPI00911039.1	IPI:IPI00911039	Invalid identifier / gene not available	1	1		0			0
FLNA_IPI:IPI00302592.2	FLNA	FLNA	1	1	226 / 411	0.549878	103.2	1970	56.7474
MYL6B_IPI:IPI00027255.1	MYL6B	MYL6B	1	1	143 / 411	0.347932	1.7	6	0.591484
QARS_IPI:IPI00026665.2	QARS	QARS	1	1	94 / 411	0.22871	5.7	31	1.30365
VARS_IPI:IPI00000873.3	VARS	VARS	1	1	100 / 411	0.243309	7.2	47	1.75182
MRPS14_IPI:IPI00005050.1	MRPS14	MRPS14	1	1	16 / 411	0.0389294	1.2	2	0.0467153
POLR2B_IPI:IPI00027808.1	POLR2B	POLR2B	1	1	58 / 411	0.141119	6.5	65	0.917275
PPP2R2C_IPI:IPI00032462.3	PPP2R2C	PPP2R2C	1	1	36 / 411	0.0875912	1.1	2	0.0963504
HSP90B1_IPI:IPI00027230.3	HSP90B1	HSP90B1	1	1	186 / 411	0.452555	13.1	96	5.92847
SLC25A6_IPI:IPI00291467.7	SLC25A6	SLC25A6	1	1	201 / 411	0.489051	7	119	3.42336
ATP2B4_IPI:IPI00012490.1	ATP2B4	ATP2B4	1	1	13 / 411	0.0316302	1.7	5	0.0537713
RCN2_IPI:IPI00029628.1	RCN2	RCN2	1	1	126 / 411	0.306569	4	26	1.22628
ACSL4_IPI:IPI00029737.1	ACSL4	ACSL4	1	1	39 / 411	0.0948905	1.2	4	0.113869
NOMO1_IPI:IPI00329352.3	NOMO1	NOMO1	1	1	19 / 411	0.0462287	1.6	12	0.0739659
PSMD14_IPI:IPI00024821.1	PSMD14	PSMD14	1	1	83 / 411	0.201946	2.4	10	0.484672
RPS27_IPI:IPI00513971.5	RPS27	RPS27	1	1	185 / 411	0.450122	3	28	1.35036
GNPAT_IPI:IPI00005677.1	GNPAT	GNPAT	1	1	5 / 411	0.0121655	1	1	0.0121655
NDUFS1_IPI:IPI00604664.5	NDUFS1	NDUFS1	1	1	19 / 411	0.0462287	4.4	33	0.203406
CLTC_IPI:IPI00024067.4	CLTC	CLTC	1	1	180 / 411	0.437956	17.2	234	7.53285
NCLN_IPI:IPI00470649.3	NCLN	NCLN	1	1	6 / 411	0.0145985	1	1	0.0145985
SMC4_IPI:IPI00411559.2	SMC4	SMC4	1	1	90 / 411	0.218978	5.2	26	1.13869
SCO2_IPI:IPI00014458.1	SCO2	SCO2	1	1	19 / 411	0.0462287	1.8	9	0.0832117
RPS26P54_IPI:IPI00376121.3	RPS26P54	Invalid identifier / gene not available	1	1		0			0
EWSR1_IPI:IPI00009841.5	EWSR1	EWSR1	1	1	143 / 411	0.347932	20.6	339	7.1674
ANAPC5_IPI:IPI00008247.2	ANAPC5	ANAPC5	1	1	9 / 411	0.0218978	2.1	7	0.0459854
SMC3_IPI:IPI00219420.3	SMC3	SMC3	1	1	73 / 411	0.177616	6.6	51	1.17226
NFKB1_IPI:IPI00292537.3	NFKB1	NFKB1	1	1	9 / 411	0.0218978	1.4	4	0.0306569
PKLR_IPI:IPI00027165.3	PKLR	PKLR	1	1	147 / 411	0.357664	1.8	13	0.643796
SERPINH1_IPI:IPI00032140.4	SERPINH1	SERPINH1	1	1	78 / 411	0.189781	5.7	32	1.08175
RPL27A_IPI:IPI00456758.4	RPL27A	RPL27A	1	1	198 / 411	0.481752	3.2	19	1.54161
CDK3_IPI:IPI00023503.4	CDK3	CDK3	1	1	44 / 411	0.107056	1.8	5	0.192701
PGAM5_IPI:IPI00788907.2	PGAM5	PGAM5	1	1	73 / 411	0.177616	5.2	29	0.923601
HUWE1_IPI:IPI00014402.1	HUWE1	HUWE1	1	1	74 / 411	0.180049	11.1	85	1.99854
CAMK2G_IPI:IPI00172450.2	CAMK2G	CAMK2G	1	1	8 / 411	0.0194647	2.5	5	0.0486618
SPANXN1_IPI:IPI00480094.1	SPANXN1	SPANXN1	1	1	0 / 411	0	0	0	0
HNRNPAB_IPI:IPI00106509.3	HNRNPAB	HNRNPAB	1	1	206 / 411	0.501217	3.6	20	1.80438
EFHA1_IPI:IPI00640276.1	EFHA1	Invalid identifier / gene not available	1	1		0			0
CLGN_IPI:IPI00024776.1	CLGN	CLGN	1	1	0 / 411	0	0	0	0
RPL23A_IPI:IPI00021266.1	RPL23A	RPL23A	1	1	224 / 411	0.545012	4.7	30	2.56156
SFXN1_IPI:IPI00009368.4	SFXN1	SFXN1	1	1	27 / 411	0.0656934	4.3	18	0.282482
ERCC2_IPI:IPI00029728.3	ERCC2	ERCC2	1	1	1 / 411	0.00243309	1	1	0.00243309
APBB1_IPI:IPI00010843.3	APBB1	APBB1	1	1	7 / 411	0.0170316	2	3	0.0340633
STT3B_IPI:IPI00152377.1	STT3B	STT3B	1	1	9 / 411	0.0218978	1.6	3	0.0350365
SFRS4_IPI:IPI00000015.2	SFRS4	Invalid identifier / gene not available	1	1		0			0
SLC25A4_IPI:IPI00022891.3	SLC25A4	SLC25A4	1	1	195 / 411	0.474453	5.1	40	2.41971
MARK4_IPI:IPI00020326.1	MARK4	MARK4	1	1	1 / 411	0.00243309	1	1	0.00243309
IGF2BP3_IPI:IPI00658000.2	IGF2BP3	IGF2BP3	1	1	87 / 411	0.211679	4.6	35	0.973723
UBXN4_IPI:IPI00293946.5	UBXN4	UBXN4	1	1	8 / 411	0.0194647	1.4	3	0.0272506
TCEB1_IPI:IPI00300341.5	TCEB1	TCEB1	1	1	46 / 411	0.111922	1.5	4	0.167883
DNA2_IPI:IPI00216142.5	DNA2	DNA2	1	1	1 / 411	0.00243309	1	1	0.00243309
MTHFD2_IPI:IPI00011307.4	MTHFD2	MTHFD2	1	1	29 / 411	0.0705596	1.6	3	0.112895
C7orf20_IPI:IPI00419575.6	C7ORF20	Invalid identifier / gene not available	1	1		0			0
IPI:IPI00176696.2_IPI:IPI00176696.2	IPI:IPI00176696	Invalid identifier / gene not available	1	1		0			0
VDAC1_IPI:IPI00216308.5	VDAC1	VDAC1	1	1	58 / 411	0.141119	4.6	31	0.649148
SRRM2_IPI:IPI00782992.3	SRRM2	SRRM2	1	1	141 / 411	0.343066	24.3	284	8.3365
C5orf30_IPI:IPI00062814.2	C5ORF30	Invalid identifier / gene not available	1	1		0			0
RRM1_IPI:IPI00013871.1	RRM1	RRM1	1	1	22 / 411	0.053528	2.5	16	0.13382
PRPH_IPI:IPI00013164.4	PRPH	PRPH	1	1	171 / 411	0.416058	4.8	98	1.99708
ATP5O_IPI:IPI00007611.1	ATP5O	ATP5O	1	1	51 / 411	0.124088	2.8	9	0.347445
UNC84B_IPI:IPI00295940.4	UNC84B	SUN2	1	1	31 / 411	0.0754258	30.3	206	2.2854
TRAM1_IPI:IPI00219111.7	TRAM1	TRAM1	1	1	4 / 411	0.00973236	1.8	3	0.0175182
PDK3_IPI:IPI00014849.3	PDK3	PDK3	1	1	6 / 411	0.0145985	1.2	2	0.0175182
SART3_IPI:IPI00006025.1	SART3	SART3	1	1	59 / 411	0.143552	7.7	34	1.10535
ATG9A_IPI:IPI00383396.9	ATG9A	ATG9A	1	1	0 / 411	0	0	0	0
CABC1_IPI:IPI00176469.2	CABC1	ADCK3	1	1	11 / 411	0.026764	1.2	2	0.0321168
TTC37_IPI:IPI00005634.3	TTC37	TTC37	1	1	15 / 411	0.0364964	2.7	12	0.0985401
NDUFA10_IPI:IPI00029561.1	NDUFA10	NDUFA10	1	1	16 / 411	0.0389294	1.4	2	0.0545012
NDUFA4_IPI:IPI00011770.1	NDUFA4	NDUFA4	1	1	7 / 411	0.0170316	1.4	3	0.0238443
WHSC2_IPI:IPI00394679.3	WHSC2	NELFA	1	1	10 / 411	0.0243309	1.2	2	0.0291971
TUBB4_IPI:IPI00023598.2	TUBB4	Invalid identifier / gene not available	1	1		0			0
ACTA2_IPI:IPI00927545.1	ACTA2	ACTA2	1	1	351 / 411	0.854015	18.6	294	15.8847
WDR6_IPI:IPI00013953.1	WDR6	WDR6	1	1	11 / 411	0.026764	4.2	16	0.112409
QPCTL_IPI:IPI00014877.4	QPCTL	QPCTL	1	1	16 / 411	0.0389294	3.1	12	0.120681
RPS10_IPI:IPI00008438.1	RPS10	RPS10	1	1	177 / 411	0.430657	5.4	32	2.32555
PTPRS_IPI:IPI00289831.4	PTPRS	PTPRS	1	1	0 / 411	0	0	0	0
PDHB_IPI:IPI00003925.6	PDHB	PDHB	1	1	52 / 411	0.126521	5.9	26	0.746472
ALB_IPI:IPI00216773.4	ALB	ALB	1	1	167 / 411	0.406326	9.9	93	4.02263
ACTA1_IPI:IPI00021428.1	ACTA1	ACTA1	1	1	354 / 411	0.861314	20.1	357	17.3124
MARK2_IPI:IPI00290158.6	MARK2	MARK2	1	1	6 / 411	0.0145985	1.2	2	0.0175182
TRABD_IPI:IPI00008732.1	TRABD	TRABD	1	1	4 / 411	0.00973236	1.5	3	0.0145985
PRPF4_IPI:IPI00150269.1	PRPF4	PRPF4	1	1	50 / 411	0.121655	5.2	16	0.632603
RPS27L_IPI:IPI00420117.6	RPS27L	RPS27L	1	1	166 / 411	0.403893	2.4	18	0.969343
CYC1_IPI:IPI00029264.3	CYC1	CYC1	1	1	9 / 411	0.0218978	2.4	7	0.0525547
TFIP11_IPI:IPI00015924.1	TFIP11	TFIP11	1	1	43 / 411	0.104623	9.7	38	1.01484
HDAC1_IPI:IPI00013774.1	HDAC1	HDAC1	1	1	108 / 411	0.262774	3.6	26	0.945985
TARS2_IPI:IPI00018632.1	TARS2	TARS2	1	1	23 / 411	0.0559611	1.6	4	0.0895377
DDOST_IPI:IPI00297084.7	DDOST	DDOST	1	1	59 / 411	0.143552	3.6	17	0.516788
PYCRL_IPI:IPI00604402.2	PYCRL	PYCRL	1	1	7 / 411	0.0170316	1	1	0.0170316
C16orf80_IPI:IPI00001655.1	C16ORF80	C16orf80	1	1	20 / 411	0.0486618	2.4	6	0.116788
RBM4_IPI:IPI00003704.4	RBM4	RBM4	1	1	33 / 411	0.080292	1.8	7	0.144526
LTV1_IPI:IPI00153032.1	LTV1	LTV1	1	1	50 / 411	0.121655	2.2	8	0.26764
MYO1B_IPI:IPI00376344.3	MYO1B	MYO1B	1	1	69 / 411	0.167883	10.4	67	1.74599
RPL35_IPI:IPI00412607.6	RPL35	RPL35	1	1	156 / 411	0.379562	3.2	56	1.2146
RBMXL2_IPI:IPI00004450.2	RBMXL2	RBMXL2	1	1	94 / 411	0.22871	2.7	12	0.617518
CEP170_IPI:IPI00186194.5	CEP170	CEP170	1	1	46 / 411	0.111922	9.6	34	1.07445
WDR68_IPI:IPI00006754.1	WDR68	Invalid identifier / gene not available	1	1		0			0
ACTR1A_IPI:IPI00029468.1	ACTR1A	ACTR1A	1	1	95 / 411	0.231144	4.2	19	0.970803
MRPL40_IPI:IPI00099871.1	MRPL40	MRPL40	1	1	5 / 411	0.0121655	1	1	0.0121655
CLU_IPI:IPI00291262.3	CLU	CLU	1	1	7 / 411	0.0170316	2	3	0.0340633
FAR1_IPI:IPI00478838.3	FAR1	FAR1	1	1	14 / 411	0.0340633	1.4	4	0.0476886
TUBA4B_IPI:IPI00017454.4	TUBA4B	Invalid identifier / gene not available	1	1		0			0
DHRS7B_IPI:IPI00550165.4	DHRS7B	DHRS7B	1	1	6 / 411	0.0145985	1.3	2	0.0189781
RBM22_IPI:IPI00019046.4	RBM22	RBM22	1	1	25 / 411	0.0608273	4.8	16	0.291971
YIPF5_IPI:IPI00334657.7	YIPF5	YIPF5	1	1	7 / 411	0.0170316	1.1	2	0.0187348
FAM98B_IPI:IPI00167572.4	FAM98B	FAM98B	1	1	54 / 411	0.131387	2.1	9	0.275912
LGALS3BP_IPI:IPI00023673.1	LGALS3BP	LGALS3BP	1	1	25 / 411	0.0608273	13.7	74	0.833333
SERPINB3_IPI:IPI00022204.2	SERPINB3	SERPINB3	1	1	36 / 411	0.0875912	5.1	43	0.446715
FAM62B_IPI:IPI00409635.2	FAM62B	Invalid identifier / gene not available	1	1		0			0
NCAPH2_IPI:IPI00644022.4	NCAPH2	NCAPH2	1	1	1 / 411	0.00243309	1	1	0.00243309
STAT1_IPI:IPI00030781.1	STAT1	STAT1	1	1	23 / 411	0.0559611	4.7	19	0.263017
PUF60_IPI:IPI00069750.2	PUF60	PUF60	1	1	145 / 411	0.352798	12.7	88	4.48054
TOE1_IPI:IPI00549516.3	TOE1	TOE1	1	1	21 / 411	0.0510949	7.8	18	0.39854
SNRPB2_IPI:IPI00029267.1	SNRPB2	SNRPB2	1	1	94 / 411	0.22871	2.7	13	0.617518
HLA-A_IPI:IPI00026569.3	HLA-A	HLA-A	1	1	30 / 411	0.0729927	1.4	5	0.10219
MAPK9_IPI:IPI00024673.2	MAPK9	MAPK9	1	1	1 / 411	0.00243309	1	1	0.00243309
HIST1H2AB_IPI:IPI00026272.2	HIST1H2AB	HIST1H2AE	1	1	271 / 411	0.659367	10	217	6.59367
MAP1B_IPI:IPI00008868.3	MAP1B	MAP1B	1	1	94 / 411	0.22871	19	184	4.3455
BCKDHA_IPI:IPI00025100.1	BCKDHA	BCKDHA	1	1	52 / 411	0.126521	14	69	1.77129
PKN2_IPI:IPI00002804.1	PKN2	PKN2	1	1	12 / 411	0.0291971	1.8	4	0.0525547
AGPS_IPI:IPI00010349.1	AGPS	AGPS	1	1	11 / 411	0.026764	2.3	9	0.0615572
M6PR_IPI:IPI00025049.1	M6PR	M6PR	1	1	3 / 411	0.00729927	1	1	0.00729927
CKMT2_IPI:IPI00015141.4	CKMT2	CKMT2	1	1	6 / 411	0.0145985	1	1	0.0145985
ERH_IPI:IPI00029631.1	ERH	ERH	1	1	150 / 411	0.364964	5.4	92	1.9708
CUL3_IPI:IPI00014312.1	CUL3	CUL3	1	1	11 / 411	0.026764	1.7	6	0.0454988
BYSL_IPI:IPI00328987.3	BYSL	BYSL	1	1	56 / 411	0.136253	1.6	5	0.218005
RPL28_IPI:IPI00182533.5	RPL28	RPL28	1	1	109 / 411	0.265207	5.7	24	1.51168
CCDC8_IPI:IPI00290526.9	CCDC8	CCDC8	1	1	5 / 411	0.0121655	1.6	4	0.0194647
SF3B2_IPI:IPI00221106.5	SF3B2	SF3B2	1	1	134 / 411	0.326034	12.7	83	4.14063
UBAC2_IPI:IPI00007034.3	UBAC2	UBAC2	1	1	6 / 411	0.0145985	1	1	0.0145985
IPO7_IPI:IPI00007402.3	IPO7	IPO7	1	1	64 / 411	0.155718	3.5	14	0.545012
IPI:IPI00383732.1_IPI:IPI00383732.1	IPI:IPI00383732	Invalid identifier / gene not available	1	1		0			0
SMARCA4_IPI:IPI00029822.4	SMARCA4	SMARCA4	1	1	59 / 411	0.143552	6.3	20	0.90438
ARHGAP30_IPI:IPI00619938.2	ARHGAP30	ARHGAP30	1	1	0 / 411	0	0	0	0
